# Supplementary material for: Enantioselective construction of dihydropyranone-fused indoles by [3 + 3] annulation of in situ-derived indolin-3-ones and unsaturated carboxylic esters
Source: Royal Society of Chemistry journal article supplement (doi:10.1039/d3qo00377a), 2023-01-01
Supplement: d3qo00377a1.pdf [file d3qo00377a1.pdf]

*Electronic Supplementary Information*

**Enantioselective Construction of Dihydropyranone-Fused  
Indoles by [3+3] Annulation of in Situ-Derived Indolin-3-  
ones and Unsaturated Carboxylic Ester**

Hongling Wang,<sup>1</sup> Qiangqiang Zhang,<sup>1</sup> Shuai Xiao,<sup>1</sup> Guanjie Wang,<sup>1</sup> Xuan Huang,<sup>1</sup>  
Xingkuan Chen,<sup>\*,2</sup> and Junmin Zhang<sup>\*,1</sup>

<sup>1</sup>International Joint Research Center for Molecular Science, College of Chemistry and Environmental Engineering & College of Physics and Optoelectronic Engineering, Shenzhen University, Shenzhen, 518060, P. R. China.

<sup>2</sup>Guangdong Provincial Key Laboratory of Functional Supramolecular Coordination Materials and Applications, Department of Chemistry, Jinan University, Guangzhou, Guangdong 510632, P. R. China.

**Table of Contents**

|     |                                                      |     |
|-----|------------------------------------------------------|-----|
| I   | General information                                  | S2  |
| II  | Preparing Materials                                  | S3  |
| III | Reaction Conditions Optimization                     | S4  |
| IV  | Characterizations of Products                        | S8  |
| V   | <sup>1</sup> H, <sup>13</sup> C NMR and HPLC spectra | S24 |

## General Information

Commercially available materials purchased from Alfa Aesar or Sigma-Aldrich were used as received. Solvents were dried over Na metal, K metal, or CaH<sub>2</sub> and were distilled under nitrogen prior to use. Proton nuclear magnetic resonance (<sup>1</sup>H NMR) spectra were recorded on a Bruker BBFO (400 MHz) spectrometer. Chemical shifts were recorded in parts per million (ppm, δ) relative to tetramethylsilane (δ 0.00) or chloroform (δ = 7.26, singlet). <sup>1</sup>H NMR splitting patterns are designated as singlet (s), doublet (d), triplet (t), quartet (q), dd (doublet of doublets); m (multiplets), etc. All first-order splitting patterns were assigned based on the appearance of the multiplet. Splitting patterns that could not be easily interpreted are designated as multiplet (m) or broad (br). Carbon nuclear magnetic resonance (<sup>13</sup>C NMR) spectra were recorded on a Bruker BBFO (100 MHz) spectrometer. Fluorine (<sup>19</sup>F) nuclear magnetic resonance (<sup>19</sup>F NMR) spectra were recorded on a Bruker BBFO (376 MHz) spectrometer. High-resolution mass spectral analysis (HRMS) was performed on Agilent 6546 LC/Q-TOF mass spectrometer. The determination of enantiomeric excess was performed *via* chiral HPLC analysis using Shimadzu LC-20AD HPLC workstation. X-ray crystallography analysis was performed on Bruker X8 APEX X-ray diffractometer. Optical rotations were measured using a 1 mL cell with a 10 mm path length on a Jasco P-1030 polarimeter and are reported as follows: [α]<sub>D</sub><sup>T</sup> (c in g per 100 mL solvent). Analytical thin-layer chromatography (TLC) was carried out on Merck 60 F254 pre-coated silica gel plate (0.2 mm thickness). Visualization was accomplished with UV light.

## Preparing Materials

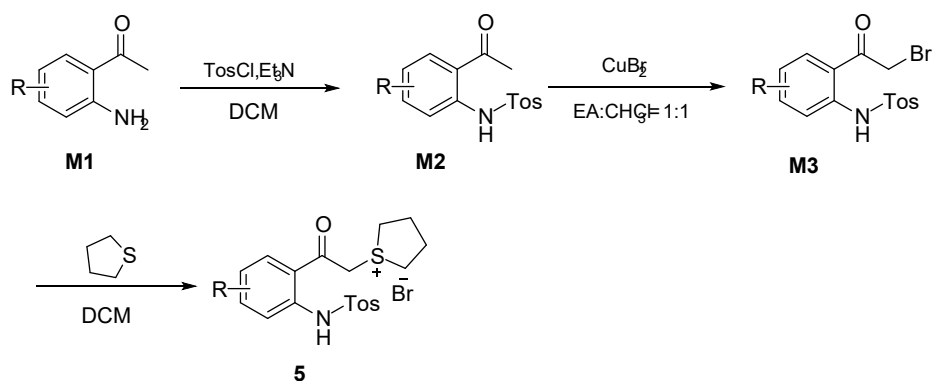

**M1** (1.0 mmol, 1.0 equiv) was dissolved in DCM (40 mL), and 4-toluenesulfonyl chloride (TosCl) (1.5 mmol, 1.5 equiv) and Et<sub>3</sub>N (3.0 mmol, 3.0 equiv) were sequentially added to the reaction mixture, which was then stirred overnight (monitored by TLC). The reaction mixture was washed twice with water (40 mL), then once with saturated brine (40 mL) and dry with anhydrous Na<sub>2</sub>SO<sub>4</sub>. After the removal of the solvent by evaporation, the crude residue was subjected to silica column purification using ethyl acetate/petroleum as an eluent to give the desired product **M2**.

**M2** (1.0 mmol, 1.0 equiv) and bromide copper (2.0 mmol, 2.0 equiv) were dissolved in a mixed solvent of ethyl acetate (20 mL) and chloroform (20 mL) under nitrogen protection and reacted at 85°C for 12 hours (monitored by TLC). Filter the solid matter in the reactant with diatomic soil, after the removal of the solvent by evaporation. Dissolving crude product added to DCM (40 mL). The crude product was washed twice with water (40 mL), then once with saturated brine (40 mL) and dry with anhydrous Na<sub>2</sub>SO<sub>4</sub>. After the removal of the solvent by evaporation, the crude residue was subjected to silica column purification using ethyl acetate/petroleum as an eluent to give the desired product **M3**.

Tetrahydrothiophene (1.2 mmol, 1.2 equiv) was added to a solution of **M3** (1.0 mmol, 1.0 equiv) in DCM (5 mL). The mixture was stirred at room temperature until there was solid precipitation, then the solid was filtered and washed with a small amount of cold dichloromethane.

## Reaction Conditions Optimization

Table S1. Screening of NHC Catalysts<sup>a</sup>

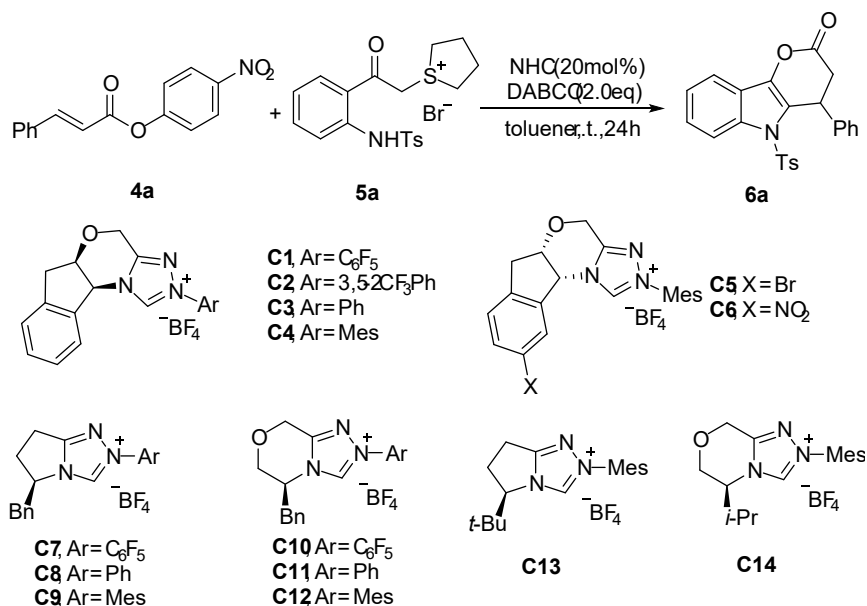

| entry | NHC        | yield (%) <sup>b</sup> | er <sup>c</sup> |
|-------|------------|------------------------|-----------------|
| 1     | <b>C1</b>  | n.r.                   | --              |
| 2     | <b>C2</b>  | n.r.                   | --              |
| 3     | <b>C3</b>  | n.r.                   | --              |
| 4     | <b>C4</b>  | 40                     | 75:25           |
| 5     | <b>C5</b>  | 53                     | 4:96            |
| 6     | <b>C6</b>  | 56                     | 2:98            |
| 7     | <b>C7</b>  | n.r.                   | --              |
| 8     | <b>C8</b>  | n.r.                   | --              |
| 9     | <b>C9</b>  | trace                  | --              |
| 10    | <b>C10</b> | n.r.                   | --              |
| 11    | <b>C11</b> | n.r.                   | --              |
| 12    | <b>C12</b> | 18                     | 71:29           |
| 13    | <b>C13</b> | 15                     | 58:42           |
| 14    | <b>C14</b> | 15                     | 75:25           |

[a]The reactions were carried under glove box using **1a** (0.12 mmol), **2a** (0.10 mmol), NHC (0.02 mmol), DABCO (2.0 mmol), toluene (2.0 mL), rt, 24 hours. All of the bases and solvents need dry. [b] Yields were isolated yields after column chromatography. [c] er was determined via HPLC on a chiral stationary phase

**Table S2. Screening of Bases<sup>a</sup>**

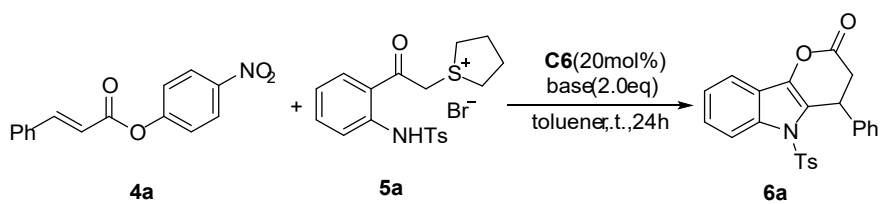

| entry | Base                            | yield (%) <sup>b</sup> | er <sup>c</sup> |
|-------|---------------------------------|------------------------|-----------------|
| 1     | K <sub>2</sub> CO <sub>3</sub>  | n.r.                   | --              |
| 2     | Cs <sub>2</sub> CO <sub>3</sub> | n.r.                   | --              |
| 3     | Na <sub>2</sub> CO <sub>3</sub> | n.r.                   | --              |
| 4     | DBU                             | n.r.                   | --              |
| 5     | DIEA                            | n.r.                   | --              |
| 6     | DABCO                           | 56                     | 2:98            |
| 7     | t-BuOK                          | n.r.                   | --              |
| 8     | NaOMe                           | n.r.                   | --              |
| 9     | NaHCO <sub>3</sub>              | n.r.                   | --              |
| 10    | DMAP                            | trace                  | --              |
| 11    | Et <sub>3</sub> N               | n.r.                   | --              |
| 12    | NaOAc                           | n.r.                   | --              |

[a]The reactions were carried under glove box using **1a** (0.12 mmol), **2a** (0.10 mmol), NHC (0.02 mmol), base (2.0 mmol), toluene (2.0 mL), rt, 24 hours. All of the bases and solvents need dry.

[b]Yields were isolated yields after column chromatography. [c] er was determined via HPLC on a chiral stationary phase.

**Table S3. Screening of Additives<sup>a</sup>**

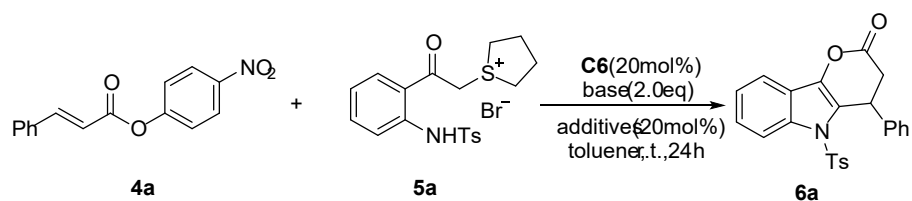

| entry | Additives                                 | yield (%) <sup>b</sup> | er <sup>c</sup> |
|-------|-------------------------------------------|------------------------|-----------------|
| 1     | Mg( <i>O</i> - <i>t</i> -Bu) <sub>2</sub> | 43                     | 5:95            |
| 2     | Sm(OTf) <sub>3</sub>                      | 40                     | 2:98            |
| 3     | AgOTf                                     | 38                     | 2:98            |
| 4     | Sc(OTf) <sub>2</sub>                      | 34                     | 10:90           |
| 5     | LiCl                                      | 36                     | 2:98            |
| 6     | Fe <sub>3</sub> Cl                        | 34                     | 2:98            |
| 7     | Urea                                      | 48                     | 2:98            |
| 8     | Thiourea                                  | 50                     | 2:98            |
| 9     | Ti( <i>O</i> - <i>i</i> -Pr) <sub>4</sub> | 47                     | 6:94            |
| 10    | LiBr                                      | 38                     | 2:98            |
| 11    | diphenylmethanol                          | 50                     | 2:98            |
| 12    | HOBt                                      | 73                     | 2:98            |

[a]The reactions were carried under glove box using **1a** (0.12 mmol), **2a** (0.10 mmol), NHC (0.02 mmol), DABCO (2.0 mmol), additives (0.02mmol), toluene (2.0 mL), rt, 24 hours. All of the bases and solvents need dry. [b]Yields were isolated yields after column chromatography. [c]Er was determined via HPLC on a chiral stationary phase.

**Table S4. Screening of Solvents<sup>a</sup>**

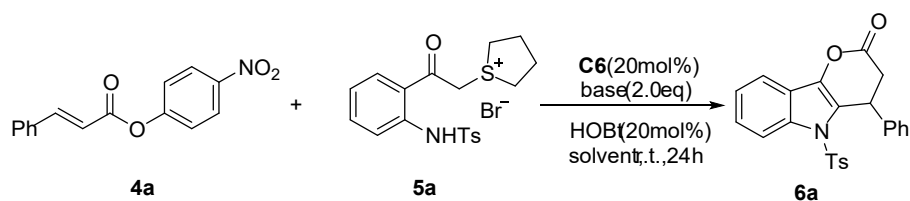

| entry | Solvent                              | yield (%) <sup>b</sup> | er <sup>c</sup> |
|-------|--------------------------------------|------------------------|-----------------|
| 1     | DCM                                  | n.r.                   | --              |
| 2     | CH <sub>3</sub> Cl                   | n.r.                   | --              |
| 3     | CCl <sub>4</sub>                     | 24                     | 3:97            |
| 4     | DCE                                  | 36                     | 3:97            |
| 5     | EA                                   | 83                     | 12:88           |
| 6     | THF                                  | 94                     | 4:96            |
| 7     | Et <sub>2</sub> O                    | 48                     | 5:95            |
| 8     | DME                                  | 80                     | 12:88           |
| 9     | 1,4-Dioxane                          | 70                     | 4:96            |
| 10    | CH <sub>3</sub> CN                   | 17                     | 10:90           |
| 11    | Toluene                              | 73                     | 2:98            |
| 12    | PhCF <sub>3</sub>                    | 55                     | 3:97            |
| 13    | Xylene                               | 61                     | 5:95            |
| 14    | 1,2-Dichlorbenzene                   | 24                     | 3:97            |
| 15    | DMF                                  | n.r.                   | --              |
| 16    | DMSO                                 | 32                     | 8:92            |
| 17    | H <sub>2</sub> O                     | n.r.                   | --              |
| 18    | Toluene:H <sub>2</sub> O (v:v = 4:1) | 68                     | 3:97            |

[a]The reactions were carried under glove box using **1a** (0.12 mmol), **2a** (0.10 mmol), NHC (0.02 mmol), DABCO (2.0 mmol), HOBT (0.02mmol), solvent (2.0 mL), rt, 24 hours. All of the bases and solvents need dry. [b]Yields were isolated yields after column chromatography. [c] Er was determined via HPLC on a chiral stationary phase.

## Characterizations of Products

### 1-(2-(2-((4-methylphenyl)sulfonamido)phenyl)-2-oxoethyl)tetrahydro-1H-thiophen-1-ium bromide

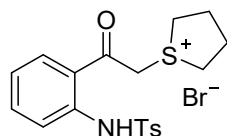

White solid, 42% total yield.

**<sup>1</sup>H NMR** (400 MHz, DMSO-*d*<sub>6</sub>) δ 10.70 (s, 1H), 7.93 (d, *J* = 7.1 Hz, 1H), 7.74 (d, *J* = 8.3 Hz, 2H), 7.62 (t, *J* = 7.3 Hz, 1H), 7.39 (d, *J* = 8.1 Hz, 2H), 7.35 (d, *J* = 8.2 Hz, 1H), 7.28 (t, *J* = 7.6 Hz, 1H), 5.35 (s, 2H), 3.59 (dq, *J* = 18.8, 6.3 Hz, 4H), 2.36 (s, 3H), 2.24 (dt, *J* = 14.6, 7.1 Hz, 4H).

**<sup>13</sup>C NMR** (100 MHz, DMSO-*d*<sub>6</sub>) δ 195.1, 144.3, 138.1, 135.8, 135.5, 132.1, 120.0, 127.0, 123.7, 123.0, 119.5, 52.9, 42.6, 28.2, 21.0.

**HRMS** (ESI, *m/z*): calcd. for C<sub>19</sub>H<sub>22</sub>NO<sub>3</sub>S<sub>2</sub><sup>+</sup> 376.1036, found 376.1039.

### 1-(2-(5-fluoro-2-((4-methylphenyl)sulfonamido)phenyl)-2-oxoethyl)tetrahydro-1H-thiophen-1-ium bromide

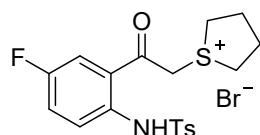

Grey solid, 45% total yield.

**<sup>1</sup>H NMR** (400 MHz, DMSO-*d*<sub>6</sub>) δ 10.41 (s, 1H), 7.77 (dd, *J* = 9.2, 3.0 Hz, 1H), 7.64 (d, *J* = 8.3 Hz, 2H), 7.50 (td, *J* = 8.7, 2.9 Hz, 1H), 7.39 (d, *J* = 8.1 Hz, 2H), 7.22 (dd, *J* = 9.1, 4.8 Hz, 1H), 5.31 (s, 2H), 3.64 (dd, *J* = 12.7, 6.5 Hz, 2H), 3.54 (dd, *J* = 12.2, 5.9 Hz, 2H), 2.36 (s, 3H), 2.26 (dq, *J* = 14.0, 7.5, 6.8 Hz, 4H).

**<sup>13</sup>C NMR** (100 MHz, DMSO-*d*<sub>6</sub>) δ 193.8, 158.2 (d, *J* = 243.6 Hz), 144.3, 135.4, 133.6 (d, *J* = 2.6 Hz), 130.0, 127.6 (d, *J* = 6.8 Hz), 127.1, 124.2 (d, *J* = 8.0 Hz), 122.1 (d, *J* = 22.7 Hz), 117.8 (d, *J* = 24.3 Hz), 52.8, 42.9, 28.3, 21.1.

**<sup>19</sup>F NMR** (376 MHz, DMSO-*d*<sub>6</sub>) δ -116.9.

**HRMS** (ESI, *m/z*): calcd. for C<sub>19</sub>H<sub>21</sub>FNO<sub>3</sub>S<sub>2</sub><sup>+</sup> 394.0941, found 394.0943.

### 1-(2-(5-chloro-2-((4-methylphenyl)sulfonamido)phenyl)-2-oxoethyl)tetrahydro-1H-thiophen-1-ium bromide

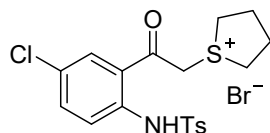

Grey solid, 50% total yield.

**<sup>1</sup>H NMR** (400 MHz, DMSO-*d*<sub>6</sub>) δ 10.58 (s, 1H), 7.99 (d, *J* = 2.4 Hz, 1H), 7.75 - 7.66 (m, 3H), 7.40 (d, *J* = 8.1 Hz, 2H), 7.32 (d, *J* = 8.9 Hz, 1H), 5.33 (s, 2H), 3.59 (dq, *J* = 20.2, 6.4 Hz, 4H), 2.37 (s, 3H), 2.25 (dt, *J* = 14.7, 7.0 Hz, 4H).

**<sup>13</sup>C NMR** (100 MHz, DMSO-*d*<sub>6</sub>) δ 194.1, 144.5, 136.6, 135.4, 135.1, 131.1, 130.1, 128.2, 127.1, 125.6, 122.3, 52.8, 42.8, 28.3, 21.1.



**HRMS** (ESI, m/z): calcd. for  $C_{19}H_{21}ClNO_3S_2^+$  410.0646, found 410.0649.

**1-(2-(5-bromo-2-((4-methylphenyl)sulfonamido)phenyl)-2-oxoethyl)tetrahydro-1H-thiophen-1-ium bromide**

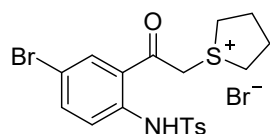

Brown solid, 50% total yield.

**<sup>1</sup>H NMR** (400 MHz, DMSO-*d*<sub>6</sub>) δ 10.59 (s, 1H), 8.09 (d, *J* = 2.3 Hz, 1H), 7.80 (dd, *J* = 8.8, 2.3 Hz, 1H), 7.72 (d, *J* = 8.3 Hz, 2H), 7.40 (d, *J* = 8.1 Hz, 2H), 7.27 (d, *J* = 8.9 Hz, 1H), 5.32 (s, 2H), 3.66 – 3.53 (m, 4H), 2.37 (s, 3H), 2.25 (ddd, *J* = 22.1, 11.3, 5.0 Hz, 4H).

**<sup>13</sup>C NMR** (100 MHz, DMSO-*d*<sub>6</sub>) δ 194.4, 144.9, 138.4, 137.5, 135.9, 134.4, 130.7, 130.5, 127.8, 127.5, 126.1, 122.7, 116.4, 53.2, 43.3, 28.7, 21.5.

**HRMS** (ESI, m/z): calcd. for  $C_{19}H_{21}BrNO_3S_2^+$  454.0141, found 454.0152.

**1-(2-(4-methoxy-2-((4-methylphenyl)sulfonamido)phenyl)-2-oxoethyl)tetrahydro-1H-thiophen-1-ium bromide**

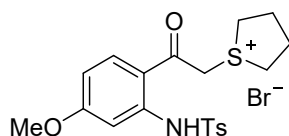

White solid, 46% total yield.

**<sup>1</sup>H NMR** (400 MHz, DMSO-*d*<sub>6</sub>) δ 11.13 (s, 1H), 7.96 (d, *J* = 9.0 Hz, 1H), 7.82 (d, *J* = 8.3 Hz, 2H), 7.43 (d, *J* = 8.2 Hz, 2H), 6.92 (d, *J* = 2.4 Hz, 1H), 6.83 (dd, *J* = 9.0, 2.4 Hz, 1H), 5.37 (s, 2H), 3.83 (s, 3H), 3.58 (dtd, *J* = 18.3, 12.1, 5.8 Hz, 4H), 2.37 (s, 3H), 2.24 (ddd, *J* = 20.8, 13.5, 6.6 Hz, 4H).

**<sup>13</sup>C NMR** (100 MHz, DMSO-*d*<sub>6</sub>) δ 194.1, 165.5, 145.1, 142.3, 135.8, 130.7, 127.7, 114.0, 109.4, 102.9, 56.6, 53.2, 43.1, 28.7, 21.5.

**HRMS** (ESI, m/z): calcd. for  $C_{19}H_{24}NO_4S_2^+$  406.1141, found 406.1141.

**1-(2-(6-((4-methylphenyl)sulfonamido)benzo[d][1,3]dioxol-5-yl)-2-oxoethyl)tetrahydro-1H-thiophen-1-ium bromide**

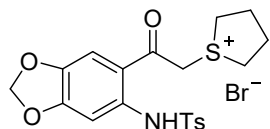

Grey solid, 62% total yield.

**<sup>1</sup>H NMR** (400 MHz, DMSO-*d*<sub>6</sub>) δ 11.12 (s, 1H), 7.76 (d, *J* = 8.3 Hz, 2H), 7.49 (s, 1H), 7.42 (d, *J* = 8.1 Hz, 2H), 6.95 (s, 1H), 6.18 (s, 2H), 5.29 (s, 2H), 3.60 (dt, *J* = 13.1, 6.4 Hz, 2H), 3.54 – 3.47 (m, 2H), 2.37 (s, 3H), 2.32 – 2.14 (m, 4H).

**<sup>13</sup>C NMR** (100 MHz, DMSO-*d*<sub>6</sub>) δ 193.6, 154.1, 145.0, 144.0, 137.5, 136.0, 130.6, 127.5, 115.3, 110.4, 103.7, 99.7, 53.5, 43.1, 28.65, 21.5.

**HRMS** (ESI, m/z): calcd. for  $C_{20}H_{22}NO_5S_2^+$  420.0934, found 420.0939.

**1-(2-oxo-2-(2-(phenylsulfonamido)phenyl)ethyl)tetrahydro-1H-thiophen-1-ium bromide**

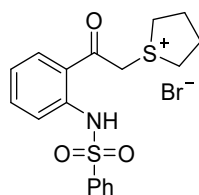

White solid, 54% total yield.

**<sup>1</sup>H NMR** (400 MHz, DMSO-*d*<sub>6</sub>) δ 10.73 (s, 1H), 7.94 (d, *J* = 7.8 Hz, 1H), 7.88 - 7.84 (m, 2H), 7.69 (ddd, *J* = 6.7, 3.9, 1.2 Hz, 1H), 7.64 - 7.57 (m, 3H), 7.36 - 7.27 (m, 2H), 5.37 (s, 2H), 3.60 (qt, *J* = 12.2, 5.9 Hz, 4H), 2.32 - 2.16 (m, 4H).

**<sup>13</sup>C NMR** (100 MHz, DMSO-*d*<sub>6</sub>) δ 195.5, 138.9, 138.4, 136.2, 134.2, 132.5, 130.1, 127.5, 124.5, 123.9, 120.4, 53.4, 43.2, 28.7.

**HRMS** (ESI, *m/z*): calcd. for C<sub>18</sub>H<sub>20</sub>NO<sub>3</sub>S<sub>2</sub><sup>+</sup> 362.0879, found 362.0880.

#### 4-phenyl-5-tosyl-4,5-dihydropyrano[3,2-b]indol-2(3H)-one (6a)

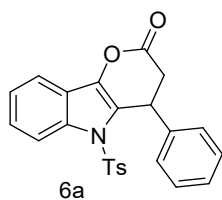

39.2 mg, 94% yield.

**<sup>1</sup>H NMR** (400 MHz, CDCl<sub>3</sub>) δ 8.15 (d, *J* = 8.4 Hz, 1H), 7.61 (d, *J* = 7.5 Hz, 1H), 7.45 - 7.37 (m, 1H), 7.36 - 7.30 (m, 1H), 7.29 - 7.24 (m, 5H), 7.18 - 7.08 (m, 4H), 6.92 (d, *J* = 8.1 Hz, 2H), 5.09 (dd, *J* = 7.7, 1.3 Hz, 1H), 3.29 (dd, *J* = 15.9, 7.8 Hz, 1H), 3.02 (dd, *J* = 15.9, 1.5 Hz, 1H), 2.26 (s, 3H).

**<sup>13</sup>C NMR** (100 MHz, CDCl<sub>3</sub>) δ 166.3, 145.1, 140.4, 138.4, 134.8, 134.7, 129.7, 129.4, 127.9, 127.4, 126.7, 126.2, 124.3, 120.9, 120.1, 117.7, 115.0, 38.5, 37.1, 21.6.

**HPLC analysis:** 4:96 *er* (S) - isomer as determined by HPLC (ID, 80:20 hexanes/iso-propanol, 0.6 ml/min) *tr*(S) = 24.2 min, *tr*(R) = 27.1 min.

**HRMS** (ESI, *m/z*): calcd. for C<sub>24</sub>H<sub>20</sub>NO<sub>4</sub>S<sup>+</sup> 418.1109, found 418.1108.

**[α]<sub>D</sub><sup>25</sup>** = 18.8 (*c* = 4.2 in CHCl<sub>3</sub>).

#### 4-(4-fluorophenyl)-5-tosyl-4,5-dihydropyrano[3,2-b]indol-2(3H)-one (6b)

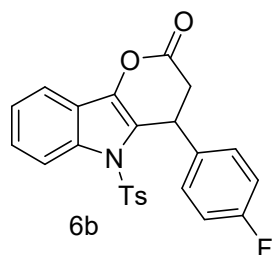

40.1 mg, 92% yield.

**<sup>1</sup>H NMR** (400 MHz, CDCl<sub>3</sub>) δ 8.16 (d, *J* = 8.4 Hz, 1H), 7.66 - 7.57 (m, 1H), 7.46 - 7.38 (m, 1H), 7.37 - 7.30 (m, 1H), 7.18 (d, *J* = 8.4 Hz, 2H), 7.07 (ddd, *J* = 8.2, 5.2, 2.5 Hz, 2H), 7.01 - 6.89 (m, 4H), 5.08 (dd, *J* = 7.7, 1.2 Hz, 1H), 3.28 (dd, *J* = 15.9, 7.8 Hz, 1H), 2.99 (dd, *J* = 15.9, 1.5 Hz, 1H), 2.28 (s, 3H).

**<sup>13</sup>C NMR** (100 MHz, CDCl<sub>3</sub>) δ 166.0, 162.4 (d, *J* = 245.0 Hz), 145.2, 138.4, 136.1 (d, *J* = 3.0 Hz), 134.8, 134.7, 129.7, 128.9 (d, *J* = 8.0 Hz), 126.5, 125.3 (d, *J* = 198.0 Hz), 120.8, 119.7, 117.7, 116.3, 116.0, 114.9, 38.4, 36.4, 21.6.

**<sup>19</sup>F NMR** (376 MHz, CDCl<sub>3</sub>) δ -114.4.

**HPLC analysis:** 5:95 *er* (S) - isomer as determined by HPLC (IA, 80:20 hexanes/iso-propanol, 0.6 ml/min) *tr*(S) = 14.9 min, *tr*(R) = 25.5 min.

**HRMS** (ESI, *m/z*): calcd. for C<sub>24</sub>H<sub>19</sub>FNO<sub>4</sub>S<sup>+</sup> 436.1013, found 436.1013.

**[α]<sub>D</sub><sup>25</sup>** = 45.6 (*c* = 4.7 in CHCl<sub>3</sub>).

#### 4-(4-chlorophenyl)-5-tosyl-4,5-dihydropyrano[3,2-b]indol-2(3H)-one (6c)

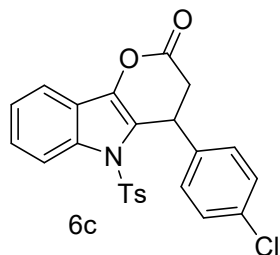

40.7 mg, 90% yield.

**<sup>1</sup>H NMR** (400 MHz, CDCl<sub>3</sub>) δ 8.18 (d, *J* = 8.4 Hz, 1H), 7.61 (d, *J* = 8.4 Hz, 1H), 7.43 (ddd, *J* = 8.5, 7.3, 1.3 Hz, 1H), 7.38 - 7.32 (m, 1H), 7.23 - 7.14 (m, 4H), 7.04 - 6.91 (m, 4H), 5.05 (d, *J* = 9.0 Hz, 1H), 3.29 (dd, *J* = 16.0, 7.8 Hz, 1H), 2.98 (d, *J* = 16.0 Hz, 1H), 2.29 (s, 3H).

**<sup>13</sup>C NMR** (100 MHz, CDCl<sub>3</sub>) δ 165.9, 145.3, 138.8, 138.6, 134.9, 133.8, 129.7, 129.5, 128.7, 126.4, 126.4, 124.4, 120.7, 119.3, 117.7, 115.0, 38.3, 36.5, 21.6.

**HPLC analysis:** 5:95 *er* (S) - isomer as determined by HPLC (IA, 80:20 hexanes/iso-propanol, 0.6 ml/min) *tr*(S) = 15.2 min, *tr*(R) = 24.6 min.

**HRMS** (ESI, *m/z*): calcd. for C<sub>24</sub>H<sub>19</sub>ClNO<sub>4</sub>S<sup>+</sup> 452.0718, found 452.0714.

**[α]<sub>D</sub><sup>25</sup>** = 44.9 (*c* = 2.6 in CHCl<sub>3</sub>).

#### 4-(4-bromophenyl)-5-tosyl-4,5-dihydropyrano[3,2-b]indol-2(3H)-one (6d)

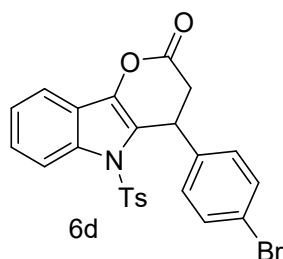

43.7 mg, 88% yield.

**<sup>1</sup>H NMR** (400 MHz, CDCl<sub>3</sub>) δ 8.19 (d, *J* = 8.4 Hz, 1H), 7.62 (d, *J* = 7.8 Hz, 1H), 7.46 - 7.40 (m, 1H), 7.39 - 7.31 (m, 3H), 7.16 (d, *J* = 8.4 Hz, 2H), 7.00 - 6.89 (m, 4H), 5.04 (d, *J* = 8.8 Hz, 1H), 3.29 (dd, *J* = 16.0, 7.9 Hz, 1H), 2.97 (dd, *J* = 16.0, 1.5 Hz, 1H), 2.30 (s, 3H).

**<sup>13</sup>C NMR** (100 MHz, CDCl<sub>3</sub>) δ 166.0, 145.2, 143.5, 138.0, 134.9, 134.7, 129.8, 127.4, 126.7, 126.4, 125.3, 125.3, 124.4, 120.9, 120.0, 117.9, 115.0, 39.1, 32.5, 21.7.

**HPLC analysis:** 6:94 *er* (S) - isomer as determined by HPLC (IA, 80:20 hexanes/iso-propanol, 0.6 ml/min) *tr*(S) = 15.9 min, *tr*(R) = 25.5 min.

**HRMS** (ESI, *m/z*): calcd. for C<sub>24</sub>H<sub>19</sub>BrNO<sub>4</sub>S<sup>+</sup> 496.0213, found 496.0209.

**[α]<sub>D</sub><sup>25</sup>** = 56.0 (*c* = 2.0 in CHCl<sub>3</sub>).

#### 5-tosyl-4-(4-(trifluoromethyl)phenyl)-4,5-dihydropyrano[3,2-b]indol-2(3H)-one (6e)

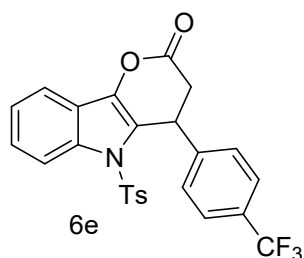

44.2 mg, 91% yield.

**<sup>1</sup>H NMR** (400 MHz, CDCl<sub>3</sub>) δ 8.21 (d, *J* = 8.4 Hz, 1H), 7.64 (d, *J* = 7.4 Hz, 1H), 7.52 - 7.41 (m, 3H), 7.40 - 7.34 (m, 1H), 7.19 (d, *J* = 8.1 Hz, 2H), 7.12 (d, *J* = 8.4 Hz, 2H), 6.91 (d, *J* = 8.1 Hz, 2H), 5.15 (d, *J* = 6.8 Hz, 1H), 3.33 (dd, *J* = 16.0, 7.9 Hz, 1H), 2.99 (dd, *J* = 16.0, 1.5 Hz, 1H), 2.26 (s, 3H).

**<sup>13</sup>C NMR** (100 MHz, CDCl<sub>3</sub>) δ 165.6, 145.3, 144.3, 144.2 138.7, 135.0, 134.9, 130.2 (q, *J* = 32.6 Hz), 129.7, 127.7, 126.6, 126.3 (q, *J* = 3.7 Hz), 124.4, 124.0 (q, *J* = 270 Hz), 120.6, 118.6, 117.8, 115.0, 38.0, 36.8, 21.5.

**<sup>19</sup>F NMR** (376 MHz, CDCl<sub>3</sub>) δ -62.6.

**HPLC analysis:** 6:94 *er* (S) - isomer as determined by HPLC (IA, 80:20 hexanes/iso-propanol, 0.6 ml/min) *tr*(S) = 12.5 min, *tr*(R) = 20.1 min.

**HRMS** (ESI, *m/z*): calcd. for C<sub>25</sub>H<sub>19</sub>F<sub>3</sub>NO<sub>4</sub>S<sup>+</sup> 486.0981, found 486.0979.

**[α]<sub>D</sub><sup>25</sup>** = 87.0 (*c* = 1.1 in CHCl<sub>3</sub>).

#### 4-(*p*-tolyl)-5-tosyl-4,5-dihydropyrano[3,2-*b*]indol-2(3H)-one (6f)

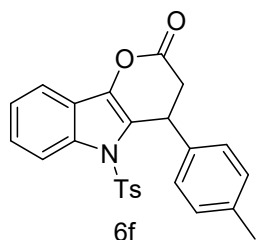

34.5 mg, 80% yield.

**<sup>1</sup>H NMR** (400 MHz, CDCl<sub>3</sub>) δ 8.15 (d, *J* = 8.4 Hz, 1H), 7.60 (d, *J* = 7.7 Hz, 1H), 7.43 - 7.37 (m, 1H), 7.32 (t, *J* = 7.5 Hz, 1H), 7.19 - 7.14 (m, 2H), 7.05 (d, *J* = 8.0 Hz, 2H), 6.99 (d, *J* = 8.1 Hz, 2H), 6.92 (d, *J* = 8.2 Hz, 2H), 5.04 (d, *J* = 7.0 Hz, 1H), 3.27 (dd, *J* = 15.9, 7.8 Hz, 1H), 2.99 (dd, *J* = 15.9, 1.2 Hz, 1H), 2.33 (s, 3H), 2.26 (s, 3H).

**<sup>13</sup>C NMR** (100 MHz, CDCl<sub>3</sub>) δ 166.4, 145.0, 138.3, 137.6, 137.4, 134.9, 134.7, 130.0, 129.6, 127.2, 126.7, 126.1, 124.2, 120.9, 120.3, 117.6, 115.0, 38.6, 36.8, 21.6, 21.2.

**HPLC analysis:** 5:95 *er* (S) - isomer as determined by HPLC (IA, 80:20 hexanes/iso-propanol, 0.6 ml/min) *tr*(S) = 13.4 min, *tr*(R) = 17.9 min.

**HRMS** (ESI, *m/z*): calcd. for C<sub>25</sub>H<sub>22</sub>NO<sub>4</sub>S<sup>+</sup> 432.1264, found 432.1269.

**[α]<sub>D</sub><sup>25</sup>** = 32.2 (*c* = 4.0 in CHCl<sub>3</sub>).

#### 4-(4-methoxyphenyl)-5-tosyl-4,5-dihydropyrano[3,2-*b*]indol-2(3H)-one (6g)

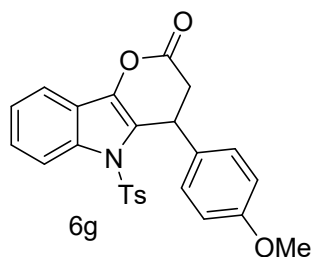

39.4 mg, 88% yield.

**<sup>1</sup>H NMR** (400 MHz, CDCl<sub>3</sub>) δ 8.15 (d, *J* = 8.4 Hz, 1H), 7.60 (d, *J* = 8.3 Hz, 1H), 7.43 - 7.37 (m, 1H), 7.35 - 7.29 (m, 1H), 7.21 - 7.15 (m, 2H), 7.05 - 7.00 (m, 2H), 6.94 (d, *J* = 8.1 Hz, 2H), 6.80 - 6.75 (m, 2H), 5.04 (d, *J* = 8.9 Hz, 1H), 3.78 (s, 3H), 3.26 (dd, *J* = 15.9, 7.7 Hz, 1H), 2.99 (dd, *J* = 15.9, 1.5 Hz, 1H), 2.26 (s, 3H).

**<sup>13</sup>C NMR** (100 MHz, CDCl<sub>3</sub>) δ 166.5, 159.4, 145.0, 138.2, 134.9, 134.7, 132.5, 129.7, 128.4, 126.7, 126.1, 124.3, 120.9, 120.4, 117.6, 115.0, 114.7, 55.5, 38.7, 36.4, 21.6.

**HPLC analysis:** 5:95 *er* (S) - isomer as determined by HPLC (ID, 80:20 hexanes/iso-propanol, 0.6 ml/min) *tr*(S) = 30.8 min, *tr*(R) = 33.4 min.

**HRMS** (ESI, *m/z*): calcd. for C<sub>25</sub>H<sub>22</sub>NO<sub>5</sub>S<sup>+</sup> 448.1213, found 448.1211.

**[α]<sub>D</sub><sup>25</sup>** = 38 (*c* = 3.0 in CHCl<sub>3</sub>).

#### 4-(3-chlorophenyl)-5-tosyl-4,5-dihydropyrano[3,2-b]indol-2(3H)-one (6h)

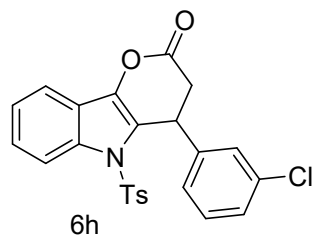

41.6 mg, 92% yield.

**<sup>1</sup>H NMR** (400 MHz, CDCl<sub>3</sub>) δ 8.20 (d, *J* = 8.4 Hz, 1H), 7.63 (d, *J* = 7.7 Hz, 1H), 7.48 - 7.41 (m, 1H), 7.39 - 7.33 (m, 1H), 7.23 (dd, *J* = 3.3, 1.5 Hz, 1H), 7.19 (dd, *J* = 8.1, 6.5 Hz, 3H), 7.02 (dt, *J* = 7.1, 1.5 Hz, 1H), 6.96 (d, *J* = 8.4 Hz, 3H), 5.11 - 5.00 (m, 1H), 3.29 (dd, *J* = 16.0, 7.9 Hz, 1H), 2.99 (dd, *J* = 16.0, 1.5 Hz, 1H), 2.28 (s, 3H).

**<sup>13</sup>C NMR** (100 MHz, CDCl<sub>3</sub>) δ 165.8, 145.3, 142.2, 138.7, 135.2, 134.9, 134.8, 130.6, 129.7, 128.1, 127.3, 126.4, 126.4, 125.5, 124.4, 120.7, 118.7, 117.8, 115.0, 38.2, 36.7, 21.6.

**HPLC analysis:** 6:94 *er* (S) - isomer as determined by HPLC (ID, 80:20 hexanes/iso-propanol, 0.6 ml/min) *tr*(S) = 20.2 min, *tr*(R) = 22.7 min.

**HRMS** (ESI, *m/z*): calcd. for C<sub>24</sub>H<sub>19</sub>ClNO<sub>4</sub>S<sup>+</sup> 452.0718, found 452.0720.

**[α]<sub>D</sub><sup>25</sup>** = 8.4 (*c* = 1.0 in CHCl<sub>3</sub>).

#### 4-(3-bromophenyl)-5-tosyl-4,5-dihydropyrano[3,2-b]indol-2(3H)-one (6i)

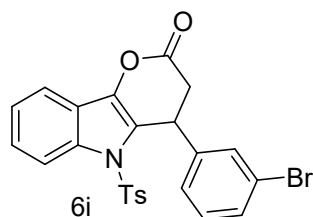

44.2 mg, 89% yield.

**<sup>1</sup>H NMR** (400 MHz, CDCl<sub>3</sub>) δ 8.21 (d, *J* = 8.4 Hz, 1H), 7.63 (d, *J* = 7.6 Hz, 1H), 7.48 - 7.42 (m, 1H), 7.37 (q, *J* = 8.2, 7.3 Hz, 2H), 7.20 - 7.09 (m, 4H), 7.06 (d, *J* = 7.8 Hz, 1H), 6.96 (d, *J* = 8.2 Hz, 2H), 5.05 (d, *J* = 6.9 Hz, 1H), 3.29 (dd, *J* = 16.0, 7.9 Hz, 1H), 2.98 (dd, *J* = 16.0, 1.4 Hz, 1H), 2.28 (s, 3H).

**<sup>13</sup>C NMR** (100 MHz, CDCl<sub>3</sub>) δ 165.8, 145.3, 142.6, 138.8, 135.0, 134.8, 131.1, 131.0, 130.2, 130.8, 126.5, 126.4, 126.1, 124.4, 123.5, 120.7, 118.7, 117.8, 115.0, 38.3, 36.7, 21.7.

**HPLC analysis:** 6:94 *er* (S) - isomer as determined by HPLC (ID, 80:20 hexanes/iso-propanol, 0.6 ml/min) *tr*(S) = 22.1 min, *tr*(R) = 24.4 min.

**HRMS** (ESI, *m/z*): calcd. for C<sub>24</sub>H<sub>19</sub>BrNO<sub>4</sub>S<sup>+</sup> 496.0213, found 496.0215.

$[\alpha]_{\text{D}}^{25} = 28.2$  (*c* = 2.9 in CHCl<sub>3</sub>).

#### 4-(*m*-tolyl)-5-tosyl-4,5-dihydropyrano[3,2-*b*]indol-2(3H)-one (6j)

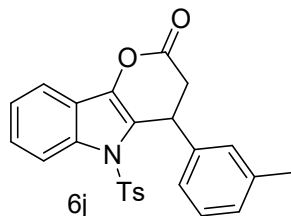

39.3 mg, 91% yield.

**<sup>1</sup>H NMR** (400 MHz, CDCl<sub>3</sub>) δ 8.17 (d, *J* = 8.4 Hz, 1H), 7.62 (d, *J* = 7.7 Hz, 1H), 7.44 - 7.38 (m, 1H), 7.34 (t, *J* = 7.5 Hz, 1H), 7.19 - 7.11 (m, 3H), 7.08 (d, *J* = 7.6 Hz, 1H), 6.93 (t, *J* = 9.2 Hz, 3H), 6.82 (s, 1H), 5.05 (d, *J* = 6.9 Hz, 1H), 3.28 (dd, *J* = 15.9, 7.8 Hz, 1H), 3.00 (dd, *J* = 15.9, 1.3 Hz, 1H), 2.26 (s, 3H), 2.22 (s, 3H).

**<sup>13</sup>C NMR** (100 MHz, CDCl<sub>3</sub>) δ 166.4, 145.0, 140.3, 139.1, 138.4, 134.9, 134.7, 129.6, 129.3, 128.6, 127.8, 126.8, 126.1, 124.5, 124.2, 120.9, 120.1, 117.7, 115.0, 38.5, 37.0, 21.6, 21.5.

**HPLC analysis:** 6:94 *er* (S) - isomer as determined by HPLC (ID, 80:20 hexanes/iso-propanol, 0.6 ml/min) *tr*(S) = 19.7 min, *tr*(R) = 22.4 min.

**HRMS** (ESI, *m/z*): calcd. for C<sub>25</sub>H<sub>22</sub>NO<sub>4</sub>S<sup>+</sup> 432.1264, found 432.1264.

$[\alpha]_{\text{D}}^{25} = 18.8$  (*c* = 4.2 in CHCl<sub>3</sub>).

#### 4-(3-methoxyphenyl)-5-tosyl-4,5-dihydropyrano[3,2-*b*]indol-2(3H)-one (6k)

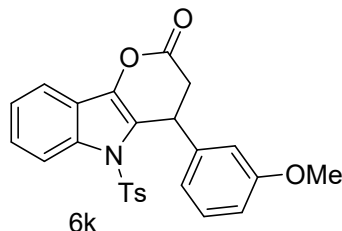

40.3 mg, 90% yield.

**<sup>1</sup>H NMR** (400 MHz, CDCl<sub>3</sub>) δ 8.17 (d, *J* = 8.4 Hz, 1H), 7.70 - 7.54 (m, 1H), 7.41 (ddd, *J* = 8.5, 7.3, 1.3 Hz, 1H), 7.37 - 7.30 (m, 1H), 7.22 - 7.14 (m, 3H), 6.93 (d, *J* = 8.1 Hz, 2H), 6.80 (dd, *J* = 8.8, 2.5 Hz, 1H), 6.71 (d, *J* = 7.7 Hz, 1H), 6.61 - 6.55 (m, 1H), 5.05 (dd, *J* = 7.7, 1.2 Hz, 1H), 3.69 (s, 3H), 3.27 (dd, *J* = 15.9, 7.8 Hz, 1H), 3.01 (dd, *J* = 15.9, 1.5 Hz, 1H), 2.26 (s, 3H).

**<sup>13</sup>C NMR** (100 MHz, CDCl<sub>3</sub>) δ 166.2, 160.3, 145.0, 141.8, 138.4, 134.8, 134.7, 130.4, 129.6, 126.6, 126.1, 124.2, 120.8, 119.7, 119.5, 117.6, 114.9, 113.1, 112.9, 55.2, 38.4, 37.0, 21.5.

**HPLC analysis:** 5:95 *er* (S) - isomer as determined by HPLC (IA, 80:20 hexanes/iso-propanol, 0.6 ml/min) *tr*(S) = 17.3 min, *tr*(R) = 20.7 min.

**HRMS** (ESI, *m/z*): calcd. for C<sub>25</sub>H<sub>22</sub>NO<sub>5</sub>S<sup>+</sup> 448.1213, found 448.1216.

$[\alpha]_{\text{D}}^{25} = 14$  (*c* = 0.5 in CHCl<sub>3</sub>).

#### 4-(2-fluorophenyl)-5-tosyl-4,5-dihydropyrano[3,2-*b*]indol-2(3H)-one (6l)

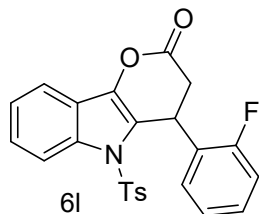

28.7 mg, 66% yield.

**<sup>1</sup>H NMR** (400 MHz, CDCl<sub>3</sub>) δ 8.19 (d, *J* = 8.4 Hz, 1H), 7.62 (d, *J* = 7.7 Hz, 1H), 7.48 - 7.40 (m, 1H), 7.35 (t, *J* = 7.5 Hz, 1H), 7.31 (d, *J* = 8.4 Hz, 2H), 7.28 - 7.23 (m, 2H), 7.16 - 7.08 (m, 1H), 7.01 (d, *J* = 8.2 Hz, 2H), 6.90 (t, *J* = 7.5 Hz, 1H), 6.74 (td, *J* = 7.7, 1.5 Hz, 1H), 5.40 (d, *J* = 6.8 Hz, 1H), 3.26 (dd, *J* = 16.2, 7.9 Hz, 1H), 3.05 (dd, *J* = 16.1, 1.4 Hz, 1H), 2.29 (s, 3H).

**<sup>13</sup>C NMR** (100 MHz, CDCl<sub>3</sub>) δ 165.9, 160.1 (d, *J* = 245 Hz), 145.1, 139.2, 134.8, 134.8, 129.7, 129.5 (d, *J* = 8.0 Hz), 128.5 (d, *J* = 4.0 Hz), 127.0 (d, *J* = 14.0 Hz), 126.4, 126.3, 124.6 (d, *J* = 4.0 Hz), 124.2, 120.7, 117.7, 117.6, 116.1 (d, *J* = 21 Hz), 114.9, 36.9, 30.7 (d, *J* = 4.0 Hz), 21.5.

**<sup>19</sup>F NMR** (376 MHz, CDCl<sub>3</sub>) δ -118.2.

**HPLC analysis:** 4:96 *er* (S) - isomer as determined by HPLC (IA, 80:20 hexanes/iso-propanol, 0.6 ml/min) *tr*(S) = 14.2 min, *tr*(R) = 15.1 min.

**HRMS** (ESI, *m/z*): calcd. for C<sub>24</sub>H<sub>19</sub>FNO<sub>4</sub>S<sup>+</sup> 436.1013, found 436.1012.

**[α]<sub>D</sub><sup>25</sup>** = 90.1 (*c* = 3.6 in CHCl<sub>3</sub>).

#### 4-(2-chlorophenyl)-5-tosyl-4,5-dihydropyrano[3,2-b]indol-2(3H)-one (6m)

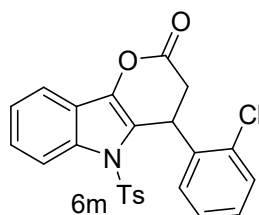

25.3 mg, 56% yield.

**<sup>1</sup>H NMR** (400 MHz, CDCl<sub>3</sub>) δ 8.23 (d, *J* = 8.5 Hz, 1H), 7.64 (d, *J* = 7.8 Hz, 1H), 7.50 - 7.42 (m, 2H), 7.40 - 7.31 (m, 3H), 7.20 (td, *J* = 7.8, 1.5 Hz, 1H), 6.99 (d, *J* = 8.1 Hz, 2H), 6.96 - 6.89 (m, 1H), 6.58 (dd, *J* = 7.8, 1.5 Hz, 1H), 5.60 - 5.54 (m, 1H), 3.24 (dd, *J* = 16.1, 7.8 Hz, 1H), 3.07 (dd, *J* = 16.1, 1.6 Hz, 1H), 2.28 (s, 3H).

**<sup>13</sup>C NMR** (100 MHz, CDCl<sub>3</sub>) δ 165.9, 145.2, 139.3, 136.9, 135.1, 134.9, 133.2, 130.5, 129.8, 129.0, 127.8, 127.5, 126.6, 126.4, 124.2, 120.5, 118.1, 117.7, 114.9, 36.5, 33.7, 21.6.

**HPLC analysis:** 95:5 *er* (S) - isomer as determined by HPLC (ID, 80:20 hexanes/iso-propanol, 0.6 ml/min) *tr*(S) = 23.8 min, *tr*(R) = 25.6 min.

**HRMS** (ESI, *m/z*): calcd. for C<sub>24</sub>H<sub>19</sub>ClNO<sub>4</sub>S<sup>+</sup> 452.0718, found 452.0720.

**[α]<sub>D</sub><sup>25</sup>** = 10.8 (*c* = 1.1 in CHCl<sub>3</sub>)

#### 4-(2-bromophenyl)-5-tosyl-4,5-dihydropyrano[3,2-b]indol-2(3H)-one (6n)



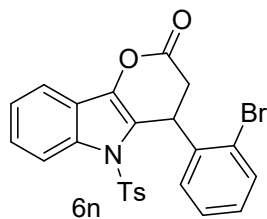

21.8 mg, 44% yield. CCDC number: 2204888.

**<sup>1</sup>H NMR** (400 MHz, CDCl<sub>3</sub>) δ 8.24 (d, *J* = 8.5 Hz, 1H), 7.70 - 7.62 (m, 2H), 7.50 - 7.42 (m, 1H), 7.34 (d, *J* = 8.3 Hz, 3H), 7.11 (td, *J* = 7.8, 1.5 Hz, 1H), 6.97 (dd, *J* = 13.8, 7.7 Hz, 3H), 6.57 (dd, *J* = 7.7, 1.4 Hz, 1H), 5.54 (d, *J* = 6.6 Hz, 1H), 3.23 (dd, *J* = 16.1, 7.8 Hz, 1H), 3.08 (dd, *J* = 16.1, 1.5 Hz, 1H), 2.28 (s, 3H).

**<sup>13</sup>C NMR** (100 MHz, CDCl<sub>3</sub>) δ 166.0, 145.2, 139.3, 138.5, 135.2, 135.0, 133.9, 129.8, 129.4, 128.2, 127.9, 126.6, 126.5, 124.3, 123.7, 120.5, 118.3, 117.7, 114.9, 36.6, 36.3, 21.7.

**HPLC analysis:** 95:5 *er* (S) - isomer as determined by HPLC (ID, 80:20 hexanes/iso-propanol, 0.6 ml/min) *tr*(S) = 26.5 min, *tr*(R) = 28.4 min.

**HRMS** (ESI, *m/z*): calcd. for C<sub>24</sub>H<sub>19</sub>BrNO<sub>4</sub>S<sup>+</sup> 496.0213, found 496.0213.

**[α]<sub>D</sub><sup>25</sup>** = 8.1 (*c* = 1.2 in CHCl<sub>3</sub>).

#### 4-(*o*-tolyl)-5-tosyl-4,5-dihydropyrano[3,2-*b*]indol-2(3H)-one (6o)

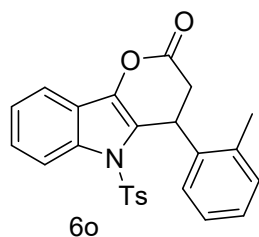

32.8 mg, 76% yield.

**<sup>1</sup>H NMR** (400 MHz, CDCl<sub>3</sub>) δ 8.16 (d, *J* = 8.4 Hz, 1H), 7.63 (d, *J* = 7.8 Hz, 1H), 7.45 - 7.39 (m, 1H), 7.37 - 7.32 (m, 1H), 7.28 (d, *J* = 7.5 Hz, 1H), 7.16 (td, *J* = 7.5, 1.0 Hz, 1H), 7.07 (d, *J* = 8.4 Hz, 2H), 6.87 (dd, *J* = 11.9, 7.9 Hz, 3H), 6.60 (d, *J* = 7.2 Hz, 1H), 5.40 - 5.33 (m, 1H), 3.27 (dd, *J* = 15.8, 8.0 Hz, 1H), 2.89 (dd, *J* = 15.8, 1.3 Hz, 1H), 2.57 (s, 3H), 2.25 (s, 3H).

**<sup>13</sup>C NMR** (100 MHz, CDCl<sub>3</sub>) δ 166.2, 144.9, 138.7, 138.0, 135.4, 134.9, 134.5, 131.4, 129.6, 127.7, 126.9, 126.7, 126.3, 126.0, 124.1, 120.6, 120.0, 117.5, 114.7, 37.1, 32.7, 21.6, 19.4.

**HPLC analysis:** 5:95 *er* (S) - isomer as determined by HPLC (ID, 80:20 hexanes/iso-propanol, 0.6 ml/min) *tr*(S) = 24.2 min, *tr*(R) = 31.9 min.

**HRMS** (ESI, *m/z*): calcd. for C<sub>25</sub>H<sub>22</sub>NO<sub>4</sub>S<sup>+</sup> 432.1264, found 432.1266.

**[α]<sub>D</sub><sup>25</sup>** = -6.1 (*c* = 0.2 in CHCl<sub>3</sub>).

#### 4-(2-methoxyphenyl)-5-tosyl-4,5-dihydropyrano[3,2-*b*]indol-2(3H)-one (6p)

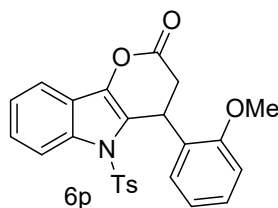

37.6 mg, 84% yield.

**<sup>1</sup>H NMR** (400 MHz, CDCl<sub>3</sub>) δ 8.14 (d, *J* = 8.4 Hz, 1H), 7.60 (d, *J* = 7.6 Hz, 1H), 7.43 - 7.36 (m, 1H), 7.32 (t, *J* = 7.5 Hz, 1H), 7.25 - 7.22 (m, 3H), 6.97 (d, *J* = 8.1 Hz, 2H), 6.91 - 6.83 (m, 2H), 6.75 (t, *J* = 7.5 Hz, 1H), 5.30 (d, *J* = 7.4 Hz, 1H), 3.81 (s, 3H), 3.19 (dd, *J* = 16.2, 8.3 Hz, 1H), 3.02 (dd, *J* = 16.2, 1.3 Hz, 1H), 2.27 (s, 3H).

**<sup>13</sup>C NMR** (100 MHz, CDCl<sub>3</sub>) δ 166.8, 157.1, 144.9, 139.1, 135.0, 134.9, 129.7, 129.3, 129.1, 128.2, 126.7, 126.0, 124.2, 121.2, 120.9, 118.8, 117.6, 115.1, 111.1, 55.2, 36.4, 32.9, 21.6.

**HPLC analysis:** 5:95 *er* (S) - isomer as determined by HPLC (IA, 80:20 hexanes/iso-propanol, 0.6 ml/min) *tr*(S) = 14.8 min, *tr*(R) = 18.1 min.

**HRMS** (ESI, *m/z*): calcd. for C<sub>25</sub>H<sub>22</sub>NO<sub>5</sub>S<sup>+</sup> 448.1213, found 444.81212.

**[α]<sub>D</sub><sup>25</sup>** = 107.6 (*c* = 3.8 in CHCl<sub>3</sub>).

#### 4-(naphthalen-2-yl)-5-tosyl-4,5-dihydropyrano[3,2-*b*]indol-2(3H)-one (6q)

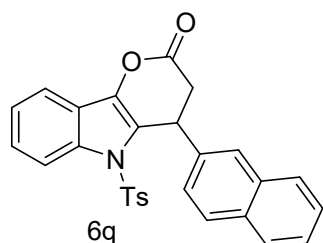

38.8 mg, 83% yield.

**<sup>1</sup>H NMR** (400 MHz, CDCl<sub>3</sub>) δ 8.23 (d, *J* = 8.4 Hz, 1H), 7.81 (d, *J* = 8.0 Hz, 1H), 7.77 (d, *J* = 8.8 Hz, 1H), 7.67 (d, *J* = 7.7 Hz, 1H), 7.53 (d, *J* = 8.0 Hz, 1H), 7.49 - 7.35 (m, 4H), 7.28 (d, *J* = 7.9 Hz, 2H), 7.05 - 6.98 (m, 2H), 6.53 (d, *J* = 8.2 Hz, 2H), 5.23 (d, *J* = 7.2 Hz, 1H), 3.36 (dd, *J* = 16.0, 7.9 Hz, 1H), 3.09 (dd, *J* = 16.0, 1.1 Hz, 1H), 2.00 (s, 3H).

**<sup>13</sup>C NMR** (100 MHz, CDCl<sub>3</sub>) δ 166.2, 144.9, 138.5, 137.5, 134.9, 134.8, 133.6, 132.9, 129.4, 129.4, 128.1, 127.7, 126.4, 126.3, 126.3, 126.3, 126.0, 125.4, 124.3, 120.8, 119.7, 117.7, 115.0, 38.4, 37.1, 21.4.

**HPLC analysis:** 94:6 *er* (S) - isomer as determined by HPLC (ID, 80:20 hexanes/iso-propanol, 0.6 ml/min) *tr*(S) = 28.6 min, *tr*(R) = 32.3 min.

**HRMS** (ESI, *m/z*): calcd. for C<sub>28</sub>H<sub>22</sub>NO<sub>4</sub>S<sup>+</sup> 468.1264, found 468.1269.

**[α]<sub>D</sub><sup>25</sup>** = 9.3 (*c* = 3.2 in CHCl<sub>3</sub>).

#### 4-(3,4-difluorophenyl)-5-tosyl-4,5-dihydropyrano[3,2-*b*]indol-2(3H)-one (6r)

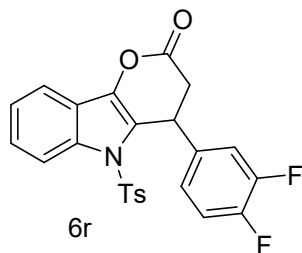

36.7 mg, 81% yield.

**<sup>1</sup>H NMR** (400 MHz, CDCl<sub>3</sub>) δ 8.20 (d, *J* = 8.5 Hz, 1H), 7.62 (d, *J* = 7.7 Hz, 1H), 7.48 - 7.41 (m, 1H), 7.36 (t, *J* = 7.5 Hz, 1H), 7.24 (d, *J* = 8.4 Hz, 2H), 7.10 - 7.04 (m, 1H), 7.01 (d, *J* = 8.1 Hz, 2H),

6.88 - 6.78 (m, 2H), 5.05 (d,  $J = 7.2$  Hz, 1H), 3.28 (dd,  $J = 16.0, 7.8$  Hz, 1H), 2.99 (dd,  $J = 16.0, 1.3$  Hz, 1H), 2.30 (s, 3H).

**$^{13}\text{C}$  NMR** (100 MHz,  $\text{CDCl}_3$ )  $\delta$  165.6, 150.6 (dd,  $J = 248.0, 12.0$  Hz), 150.0 (dd,  $J = 247.0, 12.0$  Hz), 145.4, 138.7, 137.2 (t,  $J = 4.3$  Hz), 135.0, 134.9, 129.7, 126.6, 126.3, 124.5, 123.2 (dd,  $J = 6.4, 3.6$  Hz), 120.6, 118.6, 118.1 (d,  $J = 17.4$  Hz), 117.8, 116.3 (d,  $J = 17.9$  Hz), 115.0, 38.2, 36.3, 21.5;

**$^{19}\text{F}$  NMR** (376 MHz,  $\text{CDCl}_3$ )  $\delta$  -135.9, -138.7.

**HPLC analysis:** 6:94 *er* (S) - isomer as determined by HPLC (ID, 80:20 hexanes/iso-propanol, 0.6 ml/min)  $tr(S) = 16.9$  min,  $tr(R) = 18.7$  min.

**HRMS** (ESI, m/z): calcd. for  $\text{C}_{24}\text{H}_{18}\text{F}_2\text{NO}_4\text{S}^+$  454.0919, found 454.0922.

$[\alpha]_D^{25} = 20.4$  ( $c = 3.1$  in  $\text{CHCl}_3$ ).

#### 5-tosyl-4-(3,4,5-trimethoxyphenyl)-4,5-dihydropyrano[3,2-b]indol-2(3H)-one (6s)

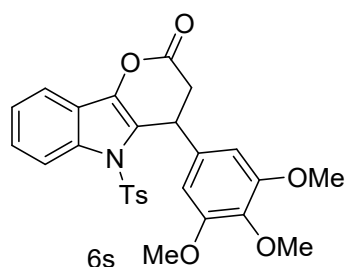

47.7 mg, 94% yield.

**$^1\text{H}$  NMR** (400 MHz,  $\text{CDCl}_3$ )  $\delta$  8.21 (d,  $J = 8.4$  Hz, 1H), 7.62 (d,  $J = 7.7$  Hz, 1H), 7.43 (t,  $J = 7.8$  Hz, 1H), 7.35 (t,  $J = 7.5$  Hz, 1H), 7.17 (d,  $J = 8.3$  Hz, 2H), 6.96 (d,  $J = 8.2$  Hz, 2H), 6.27 (s, 2H), 5.01 (d,  $J = 7.1$  Hz, 1H), 3.84 (s, 3H), 3.68 (s, 6H), 3.27 (dd,  $J = 15.9, 7.8$  Hz, 1H), 3.02 (d,  $J = 15.8$  Hz, 1H), 2.26 (s, 3H).

**$^{13}\text{C}$  NMR** (100 MHz,  $\text{CDCl}_3$ )  $\delta$  166.4, 153.8, 145.3, 138.4, 137.7, 135.8, 134.8, 134.8, 129.5, 126.6, 126.3, 124.3, 120.7, 119.7, 117.7, 115.0, 104.1, 61.0, 56.1, 38.5, 37.2, 21.6.

**HPLC analysis:** 7:93 *er* (S) - isomer as determined by HPLC (ID, 80:20 hexanes/iso-propanol, 0.6 ml/min)  $tr(S) = 21.0$  min,  $tr(R) = 23.9$  min.

**HRMS** (ESI, m/z): calcd. for  $\text{C}_{27}\text{H}_{26}\text{NO}_7\text{S}^+$  508.1424, found 508.1428.

$[\alpha]_D^{25} = -8.3$  ( $c = 6.5$  in  $\text{CHCl}_3$ ).

#### 4-(furan-2-yl)-5-tosyl-4,5-dihydropyrano[3,2-b]indol-2(3H)-one (6t)

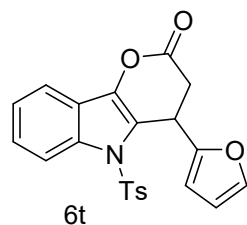

36.7 mg, 90% yield.

**$^1\text{H}$  NMR** (400 MHz,  $\text{CDCl}_3$ )  $\delta$  8.10 (d,  $J = 8.4$  Hz, 1H), 7.56 (d,  $J = 7.7$  Hz, 1H), 7.41 - 7.36 (m, 3H), 7.33 - 7.28 (m, 2H), 7.09 (d,  $J = 8.2$  Hz, 2H), 6.27 (dd,  $J = 3.1, 1.9$  Hz, 1H), 6.15 (d,  $J = 3.2$  Hz, 1H), 5.19 (dd,  $J = 5.5, 3.5$  Hz, 1H), 3.19 - 3.14 (m, 2H), 2.30 (s, 3H).

**<sup>13</sup>C NMR** (100 MHz, CDCl<sub>3</sub>) δ 166.2, 152.4, 145.3, 142.7, 138.8, 134.9, 134.8, 129.9, 126.6, 126.3, 124.4, 121.2, 117.8, 117.6, 115.0, 110.7, 107.4, 35.9, 31.2, 21.7.

**HPLC analysis:** 4:96 *er* (S) - isomer as determined by HPLC (ID, 80:20 hexanes/iso-propanol, 0.6 ml/min) *tr*(S) = 23.3 min, *tr*(R) = 27.5 min.

**HRMS** (ESI, *m/z*): calcd. for C<sub>22</sub>H<sub>18</sub>NO<sub>5</sub>S<sup>+</sup> 408.0900, found 408.0908.

**[α]<sub>D</sub><sup>25</sup>** = 50.0 (*c* = 3.3 in CHCl<sub>3</sub>).

#### 4-(thiophen-2-yl)-5-tosyl-4,5-dihydropyrano[3,2-*b*]indol-2(3H)-one (6u)

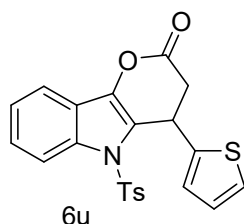

39.4 mg, 93% yield.

**<sup>1</sup>H NMR** (400 MHz, CDCl<sub>3</sub>) δ 8.15 (d, *J* = 8.4 Hz, 1H), 7.60 (s, 1H), 7.41 (ddd, *J* = 8.6, 7.3, 1.4 Hz, 1H), 7.32 (dd, *J* = 11.1, 7.9 Hz, 3H), 7.19 (dd, *J* = 5.1, 1.0 Hz, 1H), 7.03 (d, *J* = 8.2 Hz, 2H), 6.88 (dd, *J* = 5.1, 3.6 Hz, 1H), 6.79 (d, *J* = 3.3 Hz, 1H), 5.40 (d, *J* = 5.8 Hz, 1H), 3.26 (d, *J* = 7.2 Hz, 1H), 3.15 (dd, *J* = 15.9, 1.7 Hz, 1H), 2.29 (s, 3H).

**<sup>13</sup>C NMR** (100 MHz, CDCl<sub>3</sub>) δ 165.9, 145.2, 143.5, 137.9, 134.9, 134.6, 129.8, 127.3, 126.6, 126.3, 125.3, 124.3, 120.9, 120.0, 117.8, 115.0, 39.0, 32.4, 21.6.

**HPLC analysis:** 5.5:94.5 *er* (S) - isomer as determined by HPLC (ID, 80:20 hexanes/iso-propanol, 0.6 ml/min) *tr*(S) = 29.9 min, *tr*(R) = 33.3 min.

**HRMS** (ESI, *m/z*): calcd. for C<sub>22</sub>H<sub>18</sub>NO<sub>4</sub>S<sub>2</sub><sup>+</sup> 424.0672, found 424.0676.

**[α]<sub>D</sub><sup>25</sup>** = 30.1 (*c* = 0.6 in CHCl<sub>3</sub>).

#### 4-methyl-5-tosyl-4,5-dihydropyrano[3,2-*b*]indol-2(3H)-one (6v)

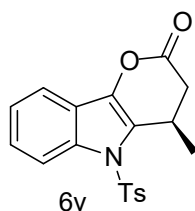

27.0 mg, 76% yield.

**<sup>1</sup>H NMR** (400 MHz, CDCl<sub>3</sub>) δ 8.16 (d, *J* = 8.4 Hz, 1H), 7.61 (d, *J* = 8.4 Hz, 2H), 7.50 (d, *J* = 7.8 Hz, 1H), 7.37 (ddd, *J* = 8.5, 7.3, 1.3 Hz, 1H), 7.33 - 7.26 (m, 1H), 7.20 (d, *J* = 8.1 Hz, 2H), 3.87 (td, *J* = 6.9, 1.7 Hz, 1H), 2.95 (dd, *J* = 16.0, 6.9 Hz, 1H), 2.83 (dd, *J* = 16.0, 1.8 Hz, 1H), 2.35 (s, 3H), 1.42 (d, *J* = 6.9 Hz, 3H).

**<sup>13</sup>C NMR** (100 MHz, CDCl<sub>3</sub>) δ 167.0, 145.4, 137.1, 135.1, 134.9, 130.1, 126.3, 125.9, 124.4, 122.6, 121.5, 117.4, 115.2, 37.2, 27.3, 21.7, 21.1.

**HPLC analysis:** 5:95 *er* (S) - isomer as determined by HPLC (IA, 80:20 hexanes/iso-propanol, 0.6 ml/min) *tr*(S) = 12.1 min, *tr*(R) = 13.4 min.

**HRMS** (ESI, *m/z*): calcd. for C<sub>19</sub>H<sub>18</sub>NO<sub>4</sub>S<sup>+</sup> 356.0951, found 356.0955.

**[α]<sub>D</sub><sup>25</sup>** = 26.7 (*c* = 0.5 in CHCl<sub>3</sub>).

**8-fluoro-4-phenyl-5-tosyl-4,5-dihydropyrano[3,2-b]indol-2(3H)-one (7a)**

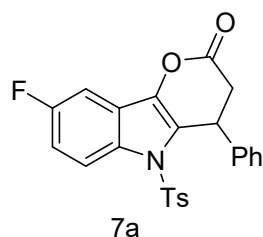

40.1 mg, 92% yield.

**<sup>1</sup>H NMR** (400 MHz, CDCl<sub>3</sub>) δ 8.10 (dd, *J* = 9.2, 4.2 Hz, 1H), 7.28 (td, *J* = 5.8, 5.3, 2.6 Hz, 3H), 7.24 (d, *J* = 2.4 Hz, 1H), 7.14 - 7.08 (m, 5H), 6.94 (d, *J* = 8.1 Hz, 2H), 5.14 - 4.99 (m, 1H), 3.28 (dd, *J* = 16.0, 7.8 Hz, 1H), 3.02 (dd, *J* = 16.0, 1.5 Hz, 1H), 2.27 (s, 3H).

**<sup>13</sup>C NMR** (100 MHz, CDCl<sub>3</sub>) δ 165.8, 159.9 (d, *J* = 241.0 Hz), 145.2, 140.1, 138.0 (d, *J* = 4.0 Hz), 134.5, 130.8, 129.7, 129.4, 127.9, 127.2, 126.6, 121.8 (d, *J* = 11.0 Hz), 116.3 (d, *J* = 9.0 Hz), 114.1 (d, *J* = 25.0 Hz), 103.5 (d, *J* = 25.0 Hz), 38.3, 37.1, 21.6.

**<sup>19</sup>F NMR** (376 MHz, CDCl<sub>3</sub>) δ -117.5.

**HPLC analysis:** 6:94 *er* (S) - isomer as determined by HPLC (IA, 80:20 hexanes/iso-propanol, 0.6 ml/min) *tr*(S) = 14.3 min, *tr*(R) = 21.2 min.

**HRMS** (ESI, *m/z*): calcd. for C<sub>24</sub>H<sub>19</sub>FNO<sub>4</sub>S<sup>+</sup> 436.1013, found 436.1016.

[α]<sub>D</sub><sup>25</sup> = 20.8 (*c* = 2.9 in CHCl<sub>3</sub>).

**8-chloro-4-phenyl-5-tosyl-4,5-dihydropyrano[3,2-b]indol-2(3H)-one (7b)**

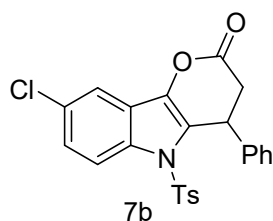

39.8 mg, 88% yield.

**<sup>1</sup>H NMR** (400 MHz, CDCl<sub>3</sub>) δ 8.07 (d, *J* = 8.9 Hz, 1H), 7.58 (d, *J* = 2.0 Hz, 1H), 7.35 (dd, *J* = 8.9, 2.1 Hz, 1H), 7.31 - 7.24 (m, 3H), 7.15 - 7.06 (m, 4H), 6.93 (d, *J* = 8.2 Hz, 2H), 5.07 (d, *J* = 6.8 Hz, 1H), 3.28 (dd, *J* = 16.0, 7.8 Hz, 1H), 3.02 (dd, *J* = 16.0, 1.4 Hz, 1H), 2.26 (s, 3H).

**<sup>13</sup>C NMR** (100 MHz, CDCl<sub>3</sub>) δ 165.8, 145.4, 140.1, 137.5, 134.5, 132.9, 130.3, 129.8, 129.5, 128.0, 127.3, 126.7, 126.4, 122.0, 121.6, 117.4, 116.1, 38.3, 37.1, 21.6.

**HPLC analysis:** 7:93 *er* (S) - isomer as determined by HPLC (IA, 80:20 hexanes/iso-propanol, 0.6 ml/min) *tr*(S) = 15.0 min, *tr*(R) = 19.9 min.

**HRMS** (ESI, *m/z*): calcd. for C<sub>24</sub>H<sub>19</sub>ClNO<sub>4</sub>S<sup>+</sup> 452.0718, found 452.0720.

[α]<sub>D</sub><sup>25</sup> = 85.1 (*c* = 3.1 in CHCl<sub>3</sub>)

**8-bromo-4-phenyl-5-tosyl-4,5-dihydropyrano[3,2-b]indol-2(3H)-one (7c)**

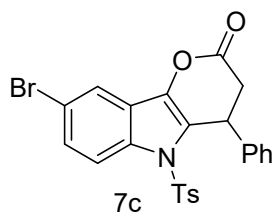

44.7 mg, 90% yield.

**<sup>1</sup>H NMR** (400 MHz, CDCl<sub>3</sub>) δ 8.02 (d, *J* = 8.9 Hz, 1H), 7.74 (d, *J* = 1.9 Hz, 1H), 7.49 (dd, *J* = 8.9, 2.0 Hz, 1H), 7.30 - 7.26 (m, 3H), 7.10 (d, *J* = 6.6 Hz, 4H), 6.93 (d, *J* = 8.2 Hz, 2H), 5.07 (d, *J* = 6.7 Hz, 1H), 3.28 (dd, *J* = 16.0, 7.8 Hz, 1H), 3.01 (dd, *J* = 16.0, 1.4 Hz, 1H), 2.27 (s, 3H).

**<sup>13</sup>C NMR** (100 MHz, CDCl<sub>3</sub>) δ 165.8, 145.4, 140.1, 137.3, 134.5, 133.3, 129.8, 129.5, 129.0, 128.0, 127.3, 126.7, 122.4, 121.4, 120.5, 117.8, 116.4, 38.3, 37.1, 21.6.

**HPLC analysis:** 7:93 *er* (S) - isomer as determined by HPLC (IA, 80:20 hexanes/iso-propanol, 0.6 ml/min) *tr*(S) = 16.4 min, *tr*(R) = 21.1 min.

**HRMS** (ESI, *m/z*): calcd. for C<sub>24</sub>H<sub>19</sub>BrNO<sub>4</sub>S<sup>+</sup> 496.0213, found 496.0216.

**[α]<sub>D</sub><sup>25</sup>** = 84.0 (*c* = 2.0 in CHCl<sub>3</sub>).

#### 8-methoxy-4-phenyl-5-tosyl-4,5-dihydro-3H-indolo[3,2-b]indol-2(3H)-one (7d)

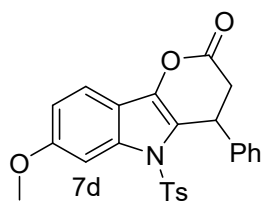

26.0 mg, 58% yield.

**<sup>1</sup>H NMR** (400 MHz, CDCl<sub>3</sub>) δ 7.69 (d, *J* = 2.1 Hz, 1H), 7.47 (d, *J* = 8.7 Hz, 1H), 7.26 (q, *J* = 4.1, 3.7 Hz, 4H), 7.15 (d, *J* = 8.4 Hz, 2H), 7.11 (dd, *J* = 6.4, 3.0 Hz, 2H), 6.95 (td, *J* = 6.1, 2.9 Hz, 3H), 5.03 (d, *J* = 6.7 Hz, 1H), 3.90 (s, 3H), 3.27 (dd, *J* = 15.9, 7.8 Hz, 1H), 2.99 (dd, *J* = 15.9, 1.4 Hz, 1H), 2.27 (s, 3H).

**<sup>13</sup>C NMR** (100 MHz, CDCl<sub>3</sub>) δ 166.4, 159.1, 145.0, 140.6, 138.5, 135.9, 134.8, 129.6, 129.3, 127.7, 127.2, 126.6, 118.3, 118.2, 114.8, 113.3, 99.6, 56.0, 38.4, 37.2, 21.6.

**HPLC analysis:** 1:99 *er* (S) - isomer as determined by HPLC (ID, 80:20 hexanes/iso-propanol, 0.6 ml/min) *tr*(S) = 29.9 min, *tr*(R) = 32.5 min.

**HRMS** (ESI, *m/z*): calcd. for C<sub>25</sub>H<sub>22</sub>NO<sub>5</sub>S<sup>+</sup> 448.1213, found 448.1215.

**[α]<sub>D</sub><sup>25</sup>** = -20.3 (*c* = 0.9 in CHCl<sub>3</sub>).

#### 8-phenyl-9-tosyl-8,9-dihydro-[1,3]dioxolo[4,5-f]pyrano[3,2-b]indol-6(7H)-one (7e)

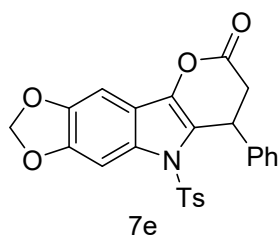

27.7 mg, 60% yield.

**<sup>1</sup>H NMR** (400 MHz, CDCl<sub>3</sub>) δ 7.67 - 7.63 (m, 1H), 7.29 - 7.26 (m, 3H), 7.16 - 7.08 (m, 4H), 7.01 - 6.90 (m, 3H), 6.03 (dd, *J* = 6.6, 1.2 Hz, 2H), 5.01 (dd, *J* = 7.7, 1.4 Hz, 1H), 3.25 (dd, *J* = 15.9, 7.8 Hz, 1H), 2.98 (dd, *J* = 15.9, 1.5 Hz, 1H), 2.28 (s, 3H).

**<sup>13</sup>C NMR** (100 MHz, CDCl<sub>3</sub>) δ 166.4, 147.8, 145.8, 145.1, 140.7, 138.7, 134.7, 129.8, 129.7, 129.4, 127.8, 127.3, 126.7, 118.6, 115.2, 101.8, 96.8, 96.5, 38.5, 37.3, 21.7.

**HPLC analysis:** 3:97 *er* (S) - isomer as determined by HPLC (IA, 80:20 hexanes/iso-propanol, 0.6 ml/min) *tr*(S) = 19.8 min, *tr*(R) = 30.8 min.

**HRMS** (ESI, *m/z*): calcd. for C<sub>25</sub>H<sub>20</sub>NO<sub>6</sub>S<sup>+</sup> 462.1006, found 462.1009.

**[α]<sub>D</sub><sup>25</sup>** = 44.4 (*c* = 0.9 in CHCl<sub>3</sub>)

#### 5-phenyl-5-(phenylsulfonyl)-4,5-dihydropyrano[3,2-*b*]indol-2(3H)-one (7f)

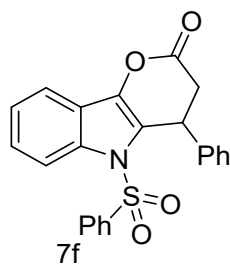

38.3 mg, 95% yield.

**<sup>1</sup>H NMR** (400 MHz, CDCl<sub>3</sub>) δ 8.17 (d, *J* = 8.4 Hz, 1H), 7.65 - 7.61 (m, 1H), 7.45 - 7.32 (m, 3H), 7.26 (tt, *J* = 4.0, 2.0 Hz, 6H), 7.18 - 7.09 (m, 4H), 5.09 (dd, *J* = 7.8, 1.4 Hz, 1H), 3.30 (dd, *J* = 15.9, 7.8 Hz, 1H), 3.02 (dd, *J* = 15.9, 1.5 Hz, 1H).

**<sup>13</sup>C NMR** (100 MHz, CDCl<sub>3</sub>) δ 166.2, 140.3, 138.4, 137.7, 134.6, 133.8, 129.4, 129.0, 127.9, 127.2, 126.6, 126.2, 124.3, 120.9, 119.9, 117.7, 114.9, 38.4, 37.1.

**HPLC analysis:** 5:95 *er* (S) - isomer as determined by HPLC (IA, 80:20 hexanes/iso-propanol, 0.6 ml/min) *tr*(S) = 14.2 min, *tr*(R) = 17.5 min.

**HRMS** (ESI, *m/z*): calcd. for C<sub>23</sub>H<sub>18</sub>NO<sub>4</sub>S<sup>+</sup> 404.0951, found 404.0955.

**[α]<sub>D</sub><sup>25</sup>** = 32.9 (*c* = 1.6 in CHCl<sub>3</sub>).

Spectra  
 $^1\text{H}$ ,  $^{13}\text{C}$ ,  $^{19}\text{F}$  NMR

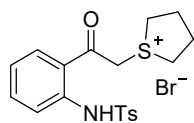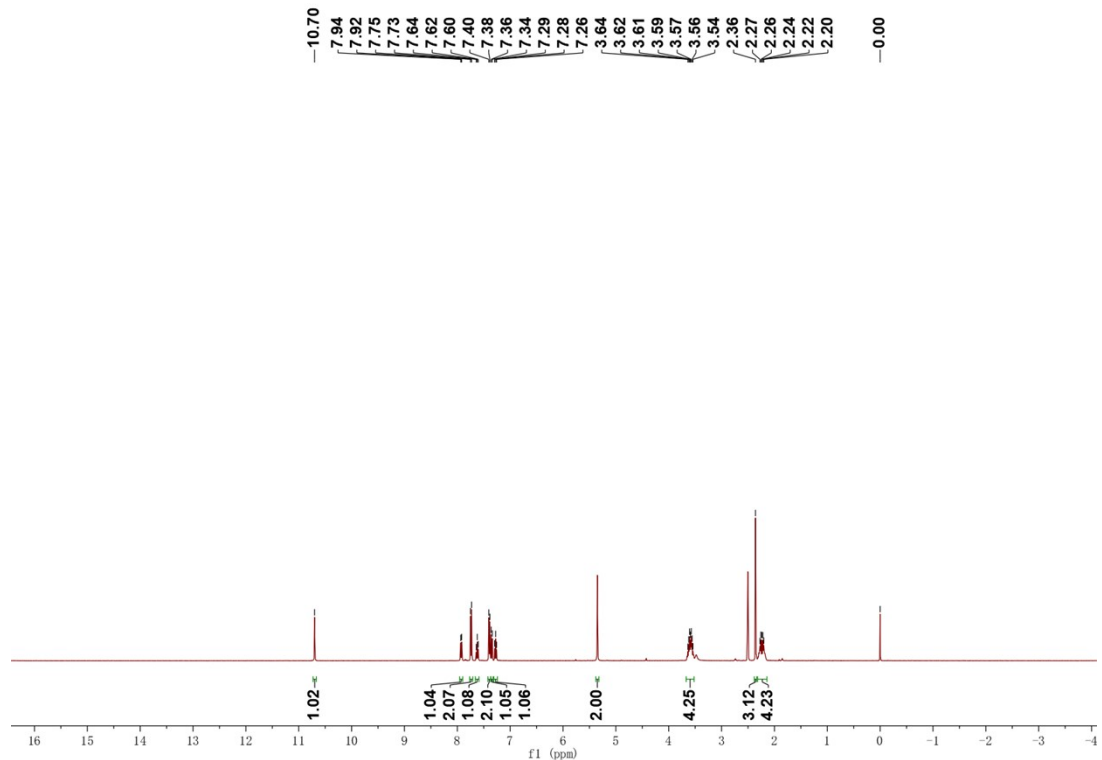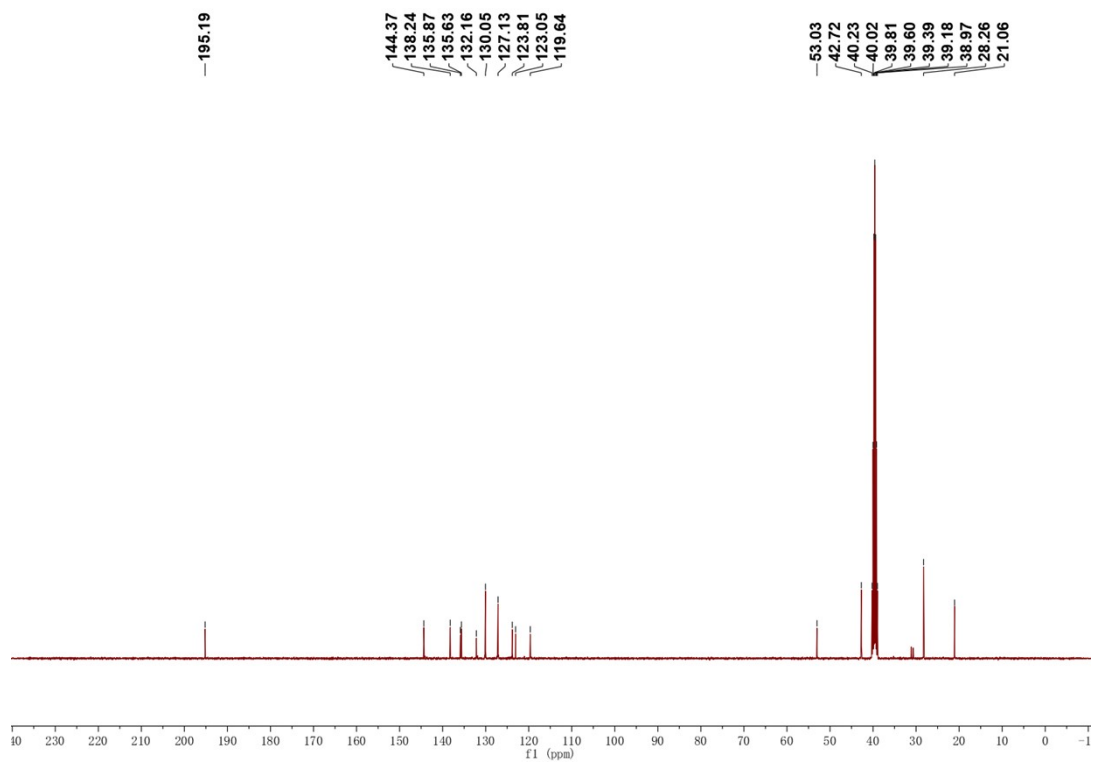



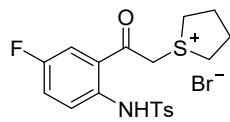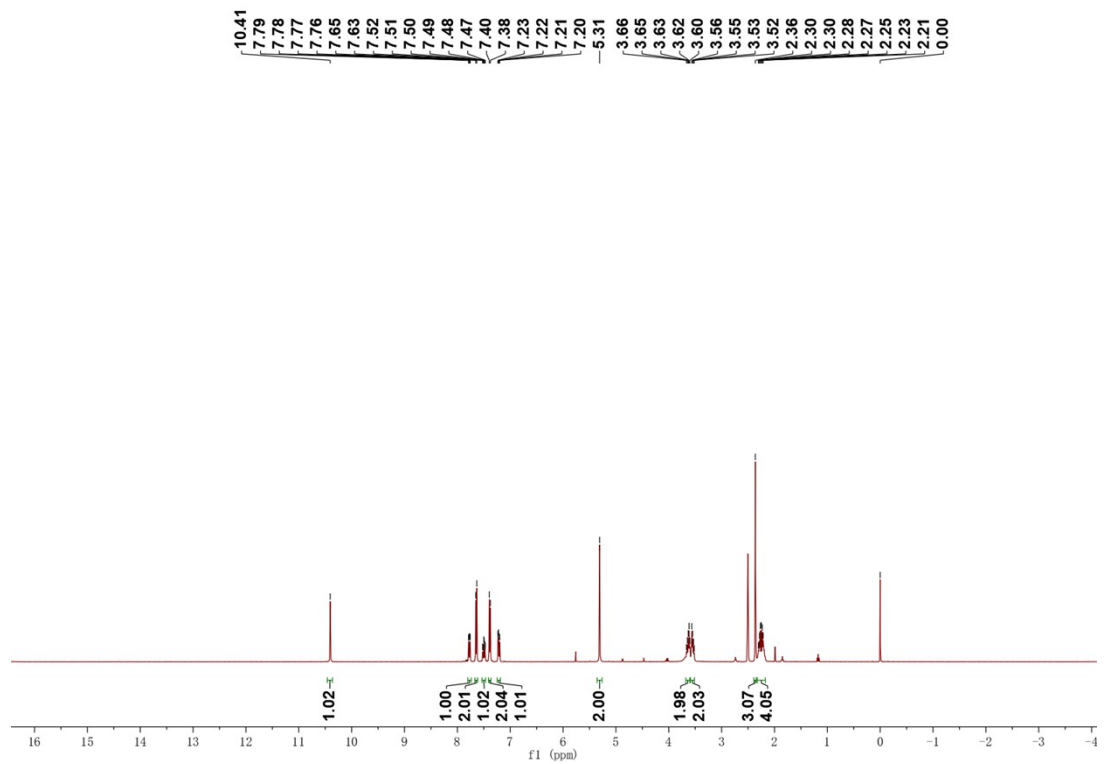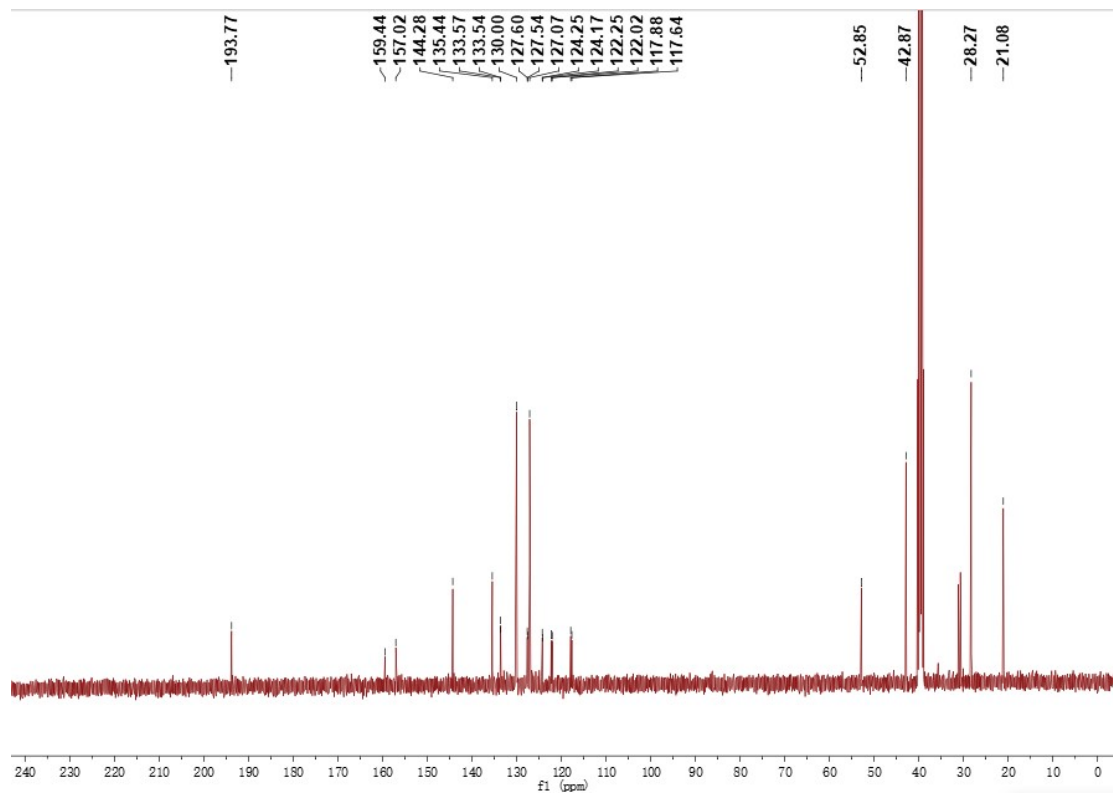

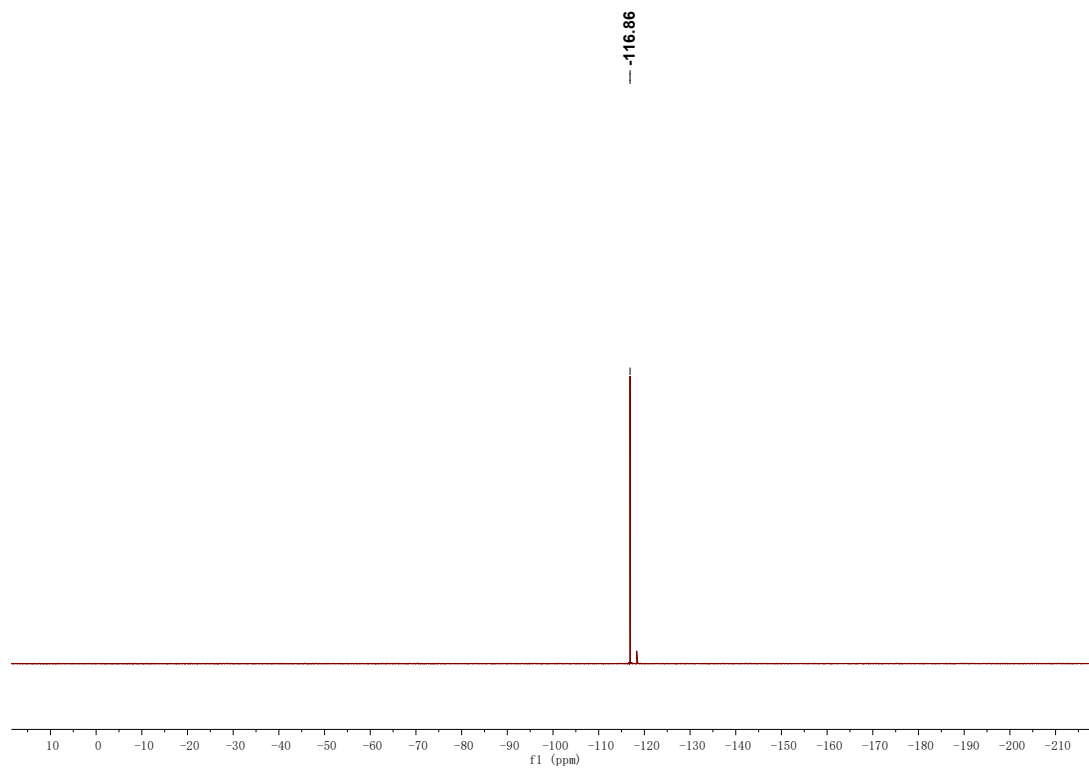

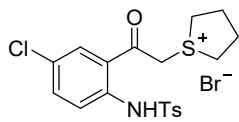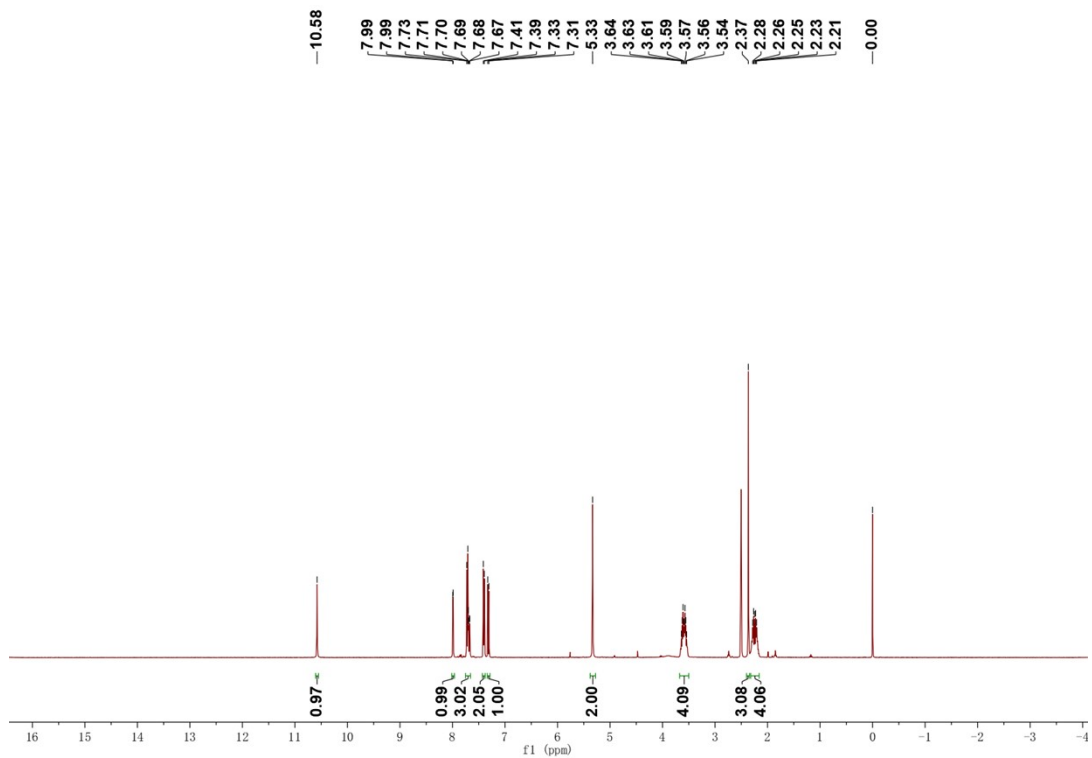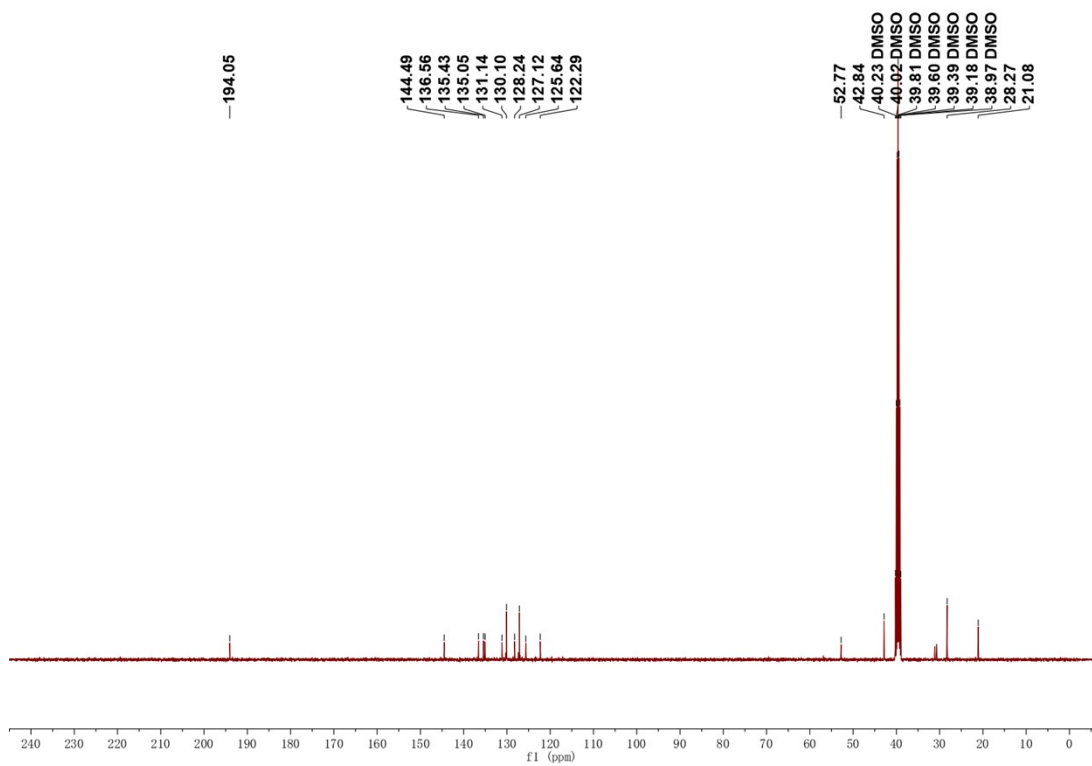

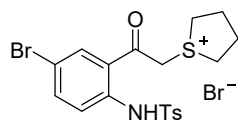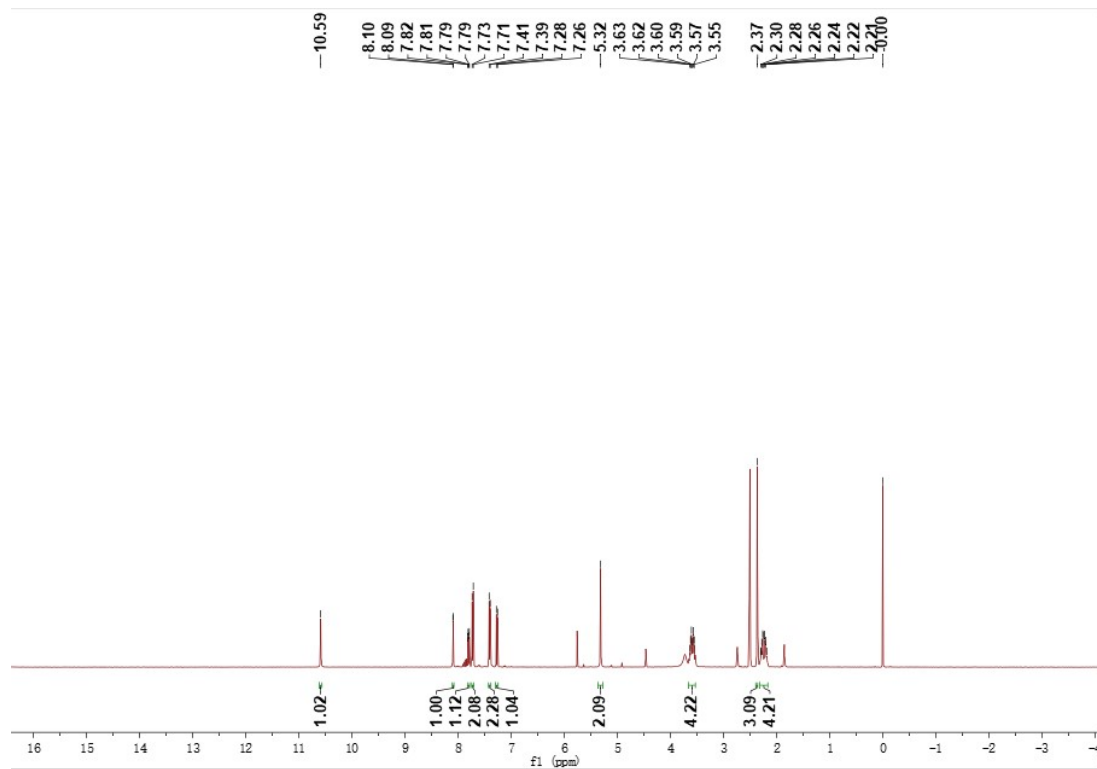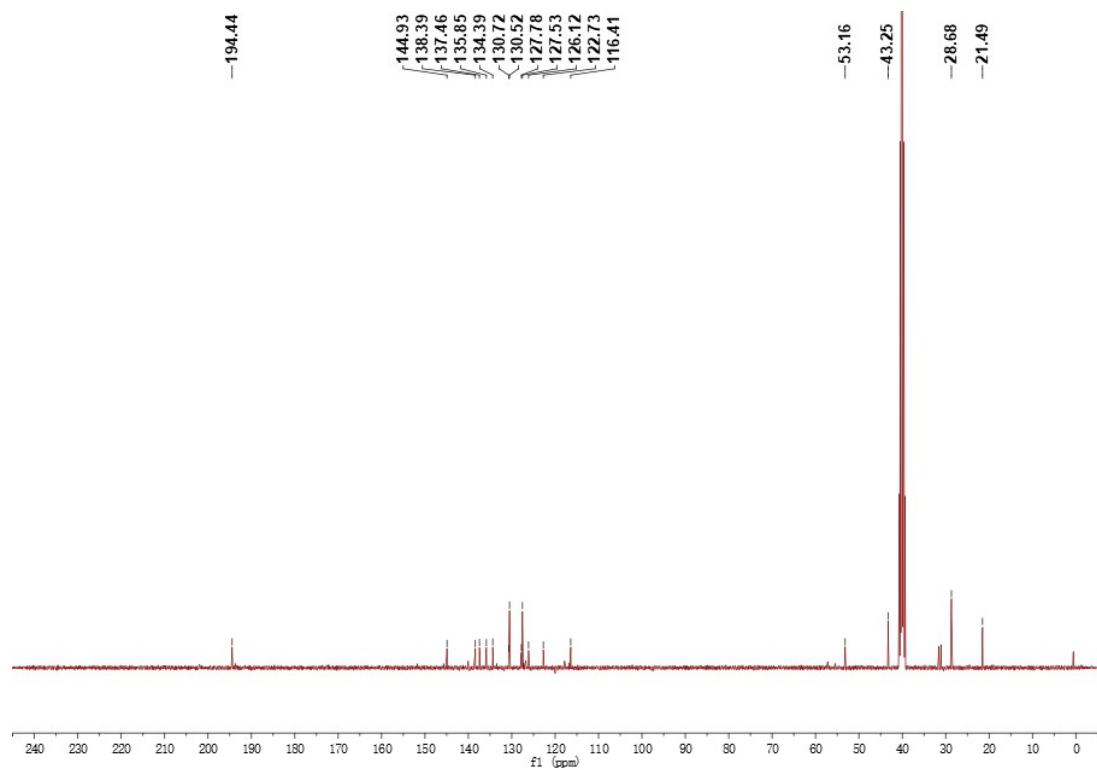

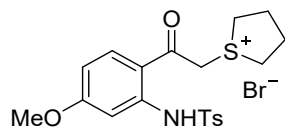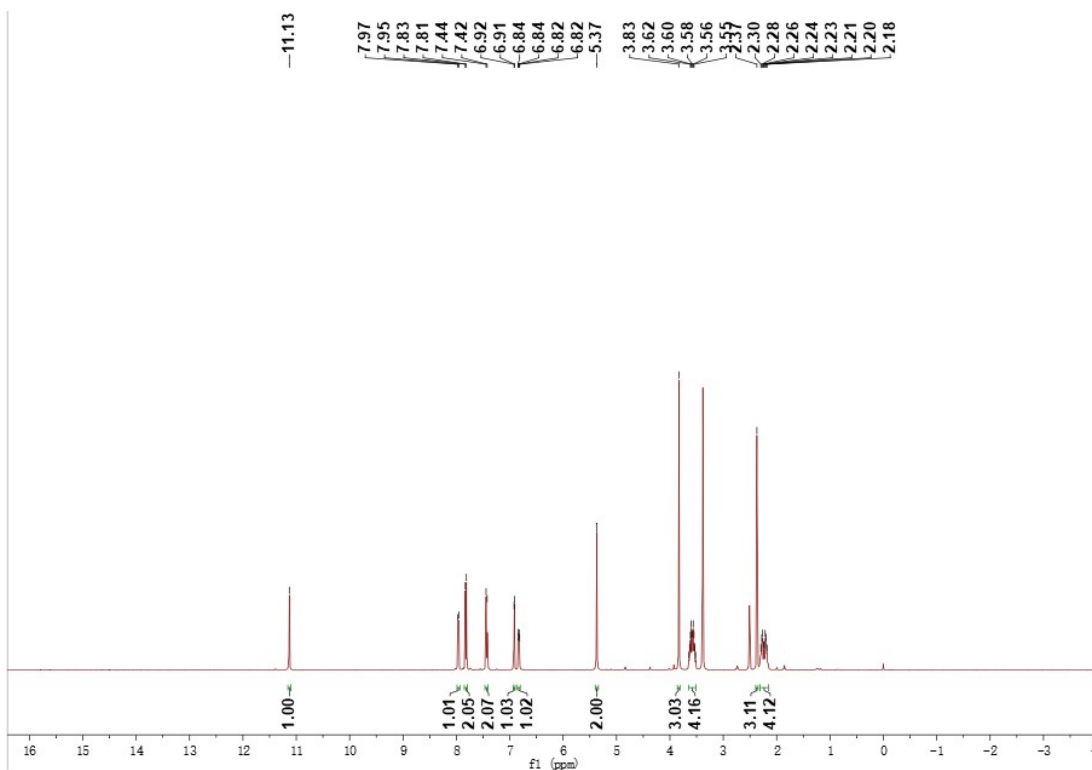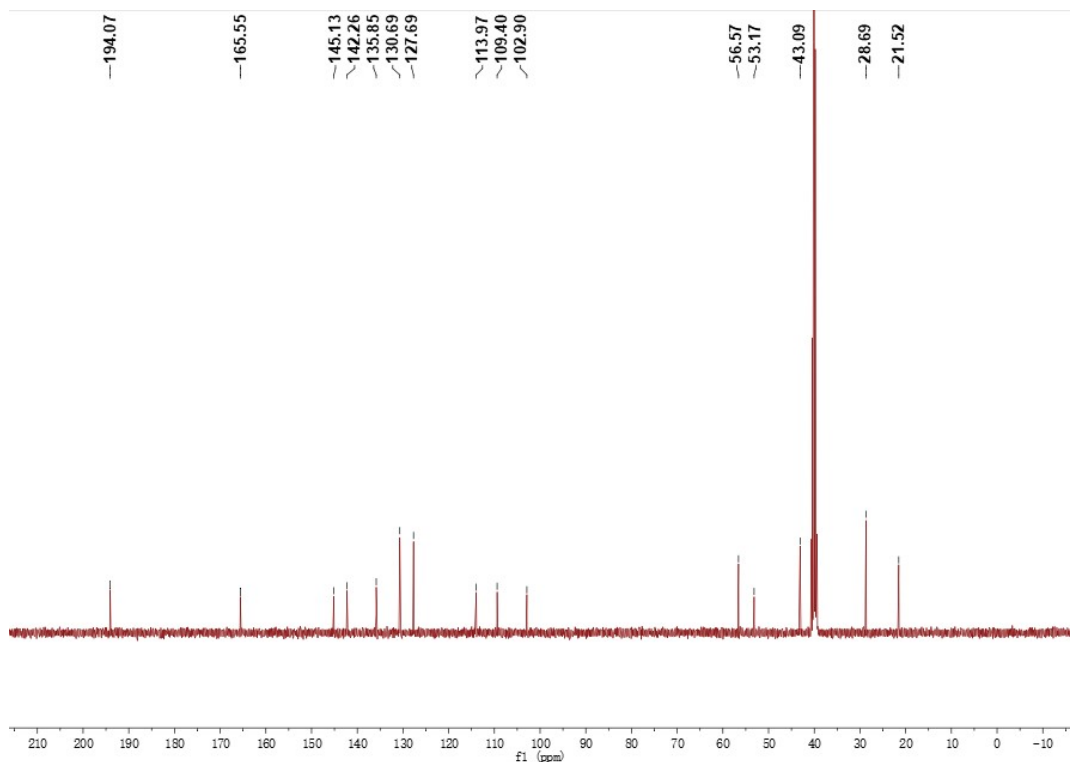

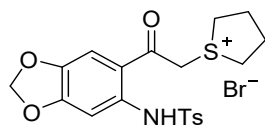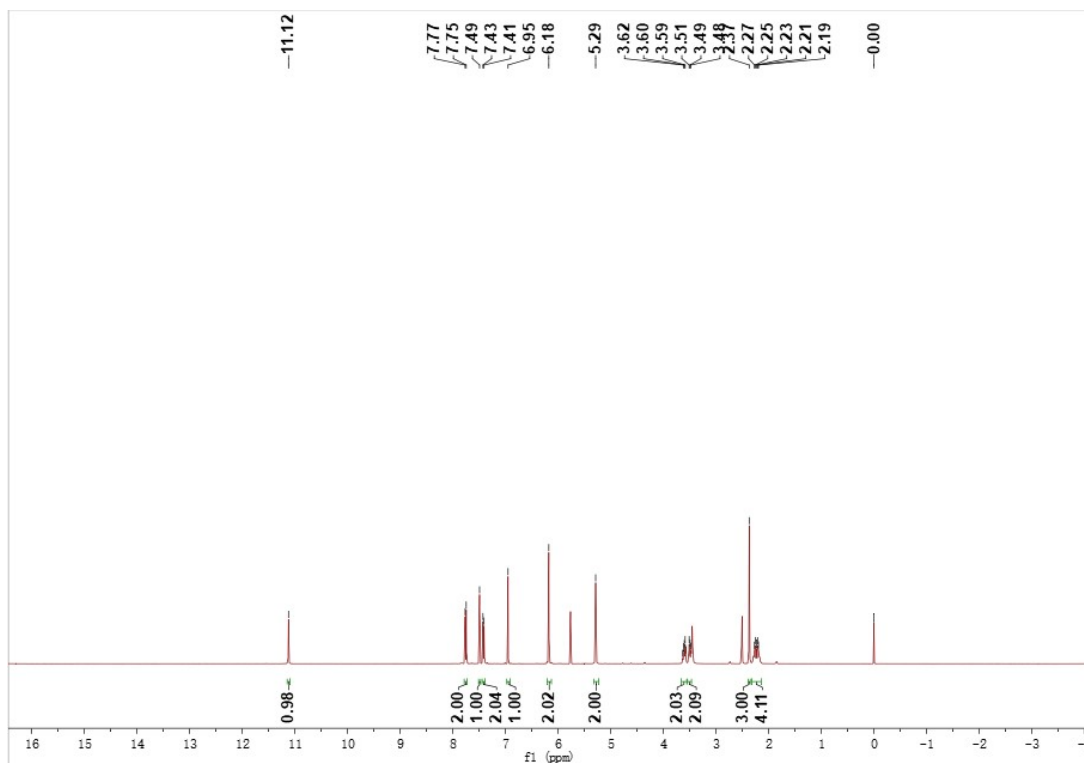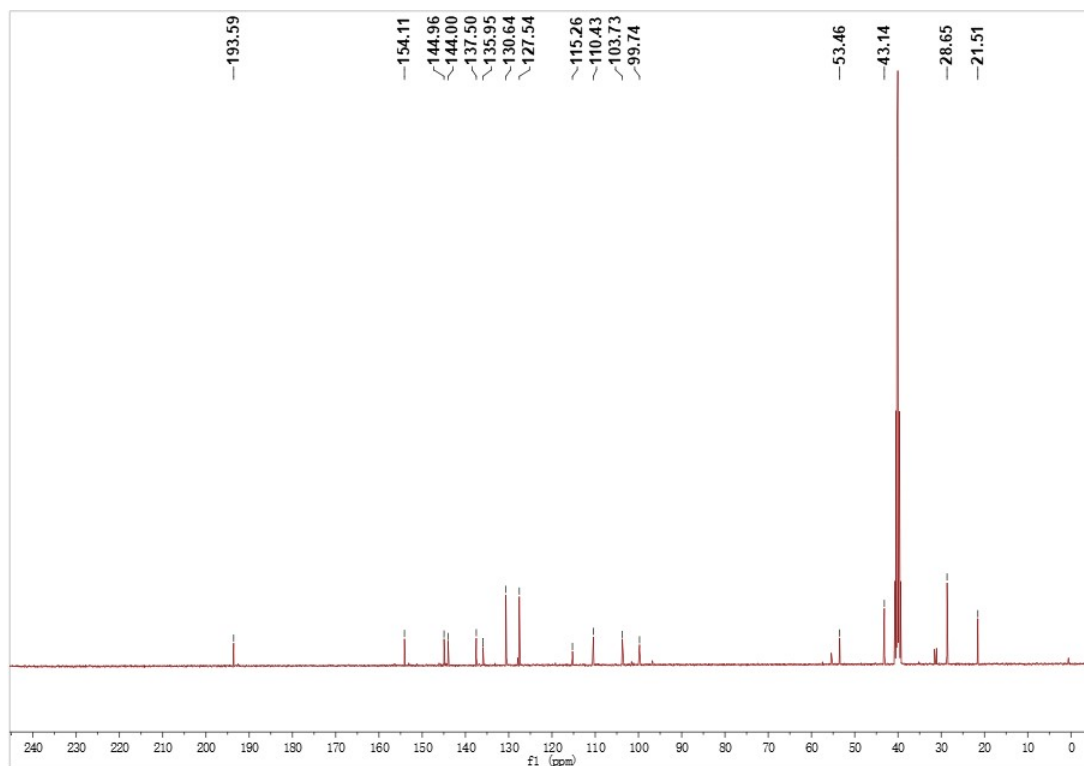

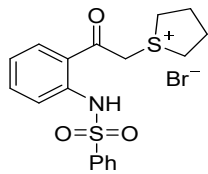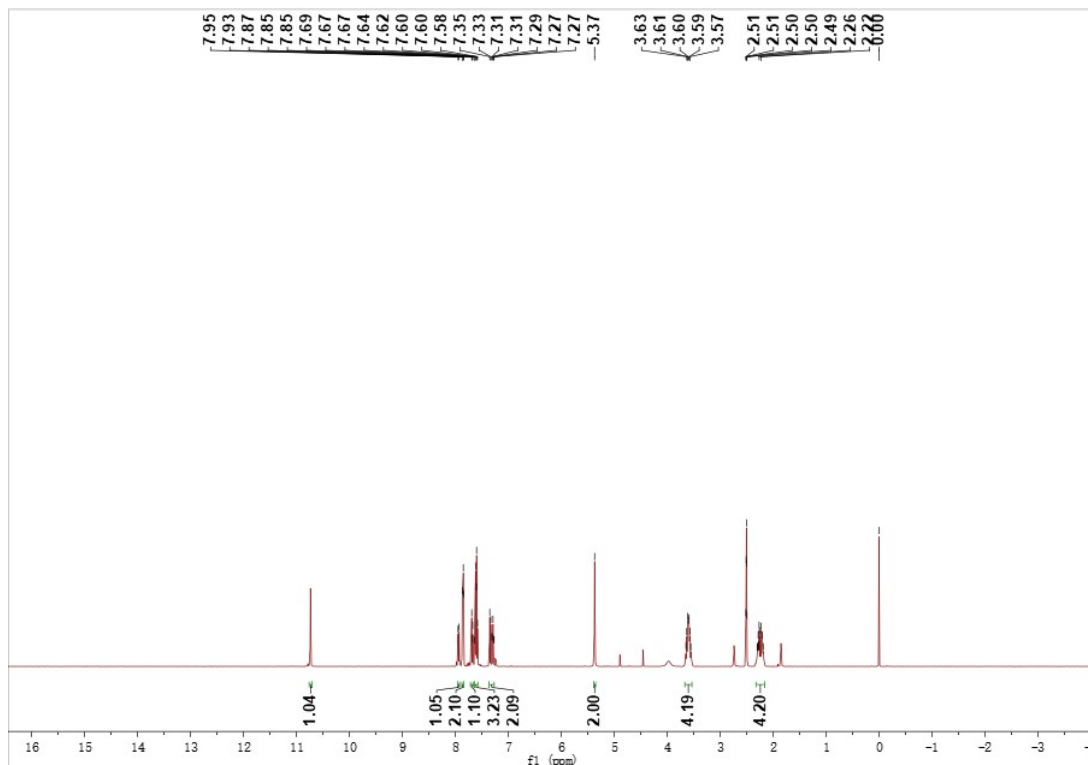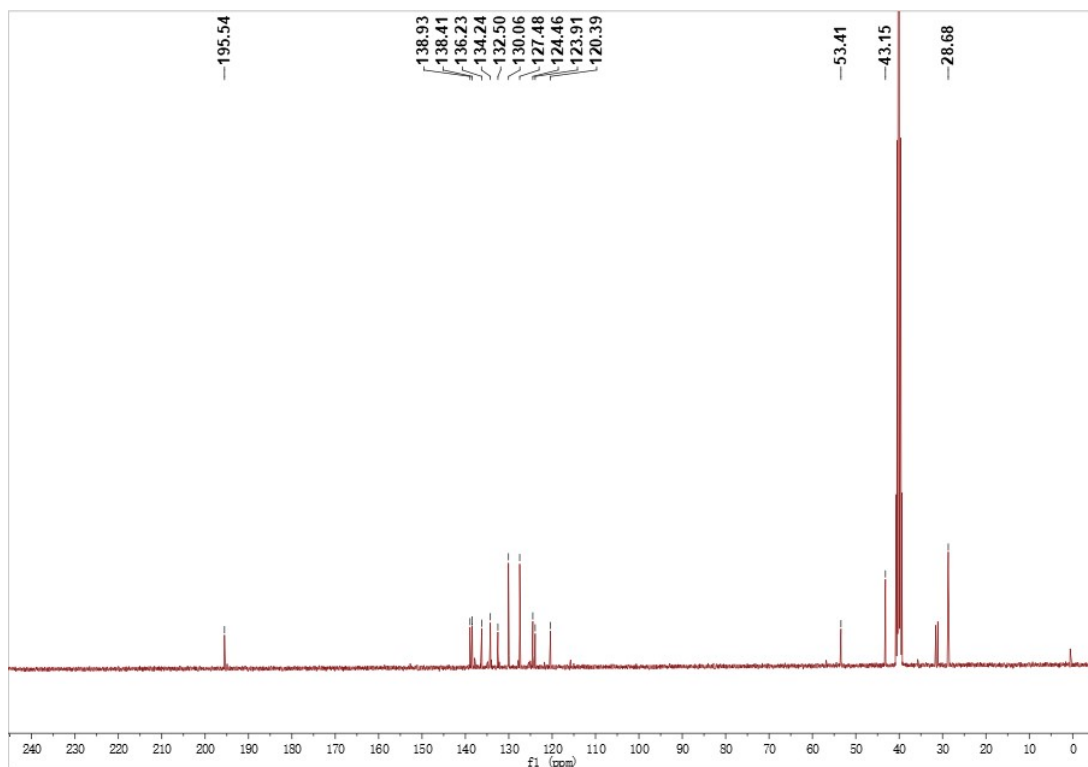

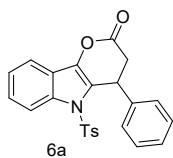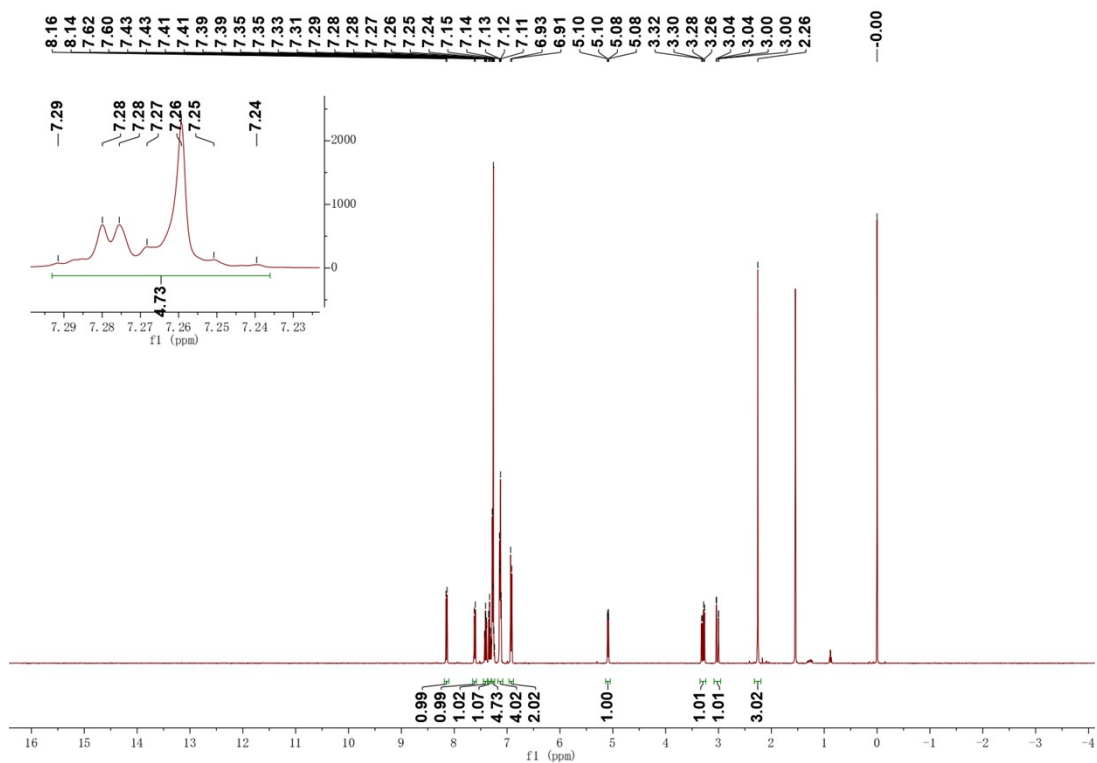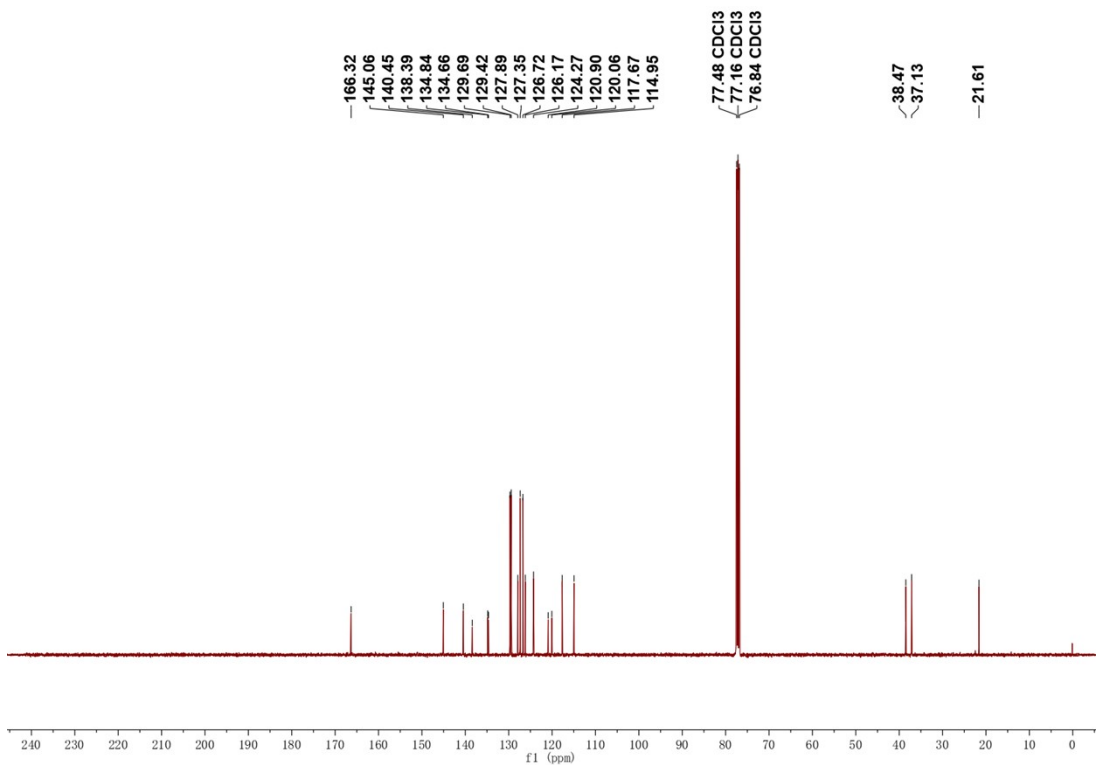



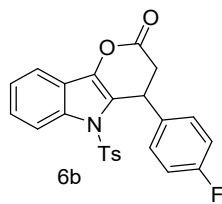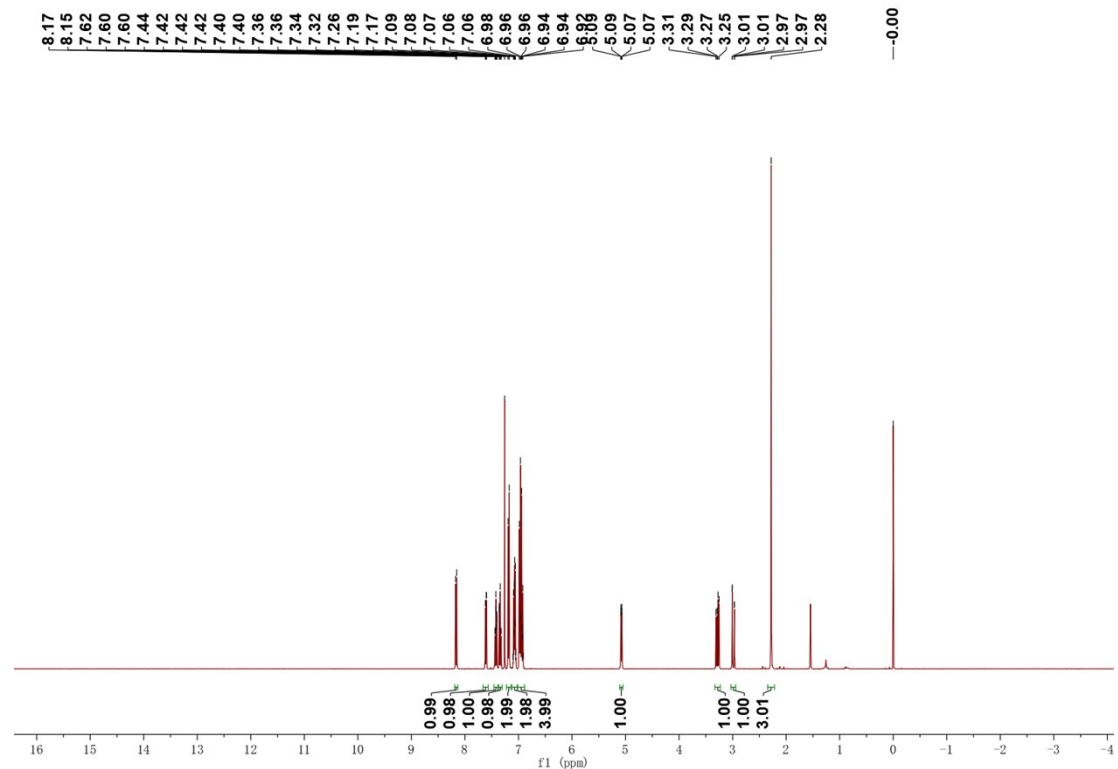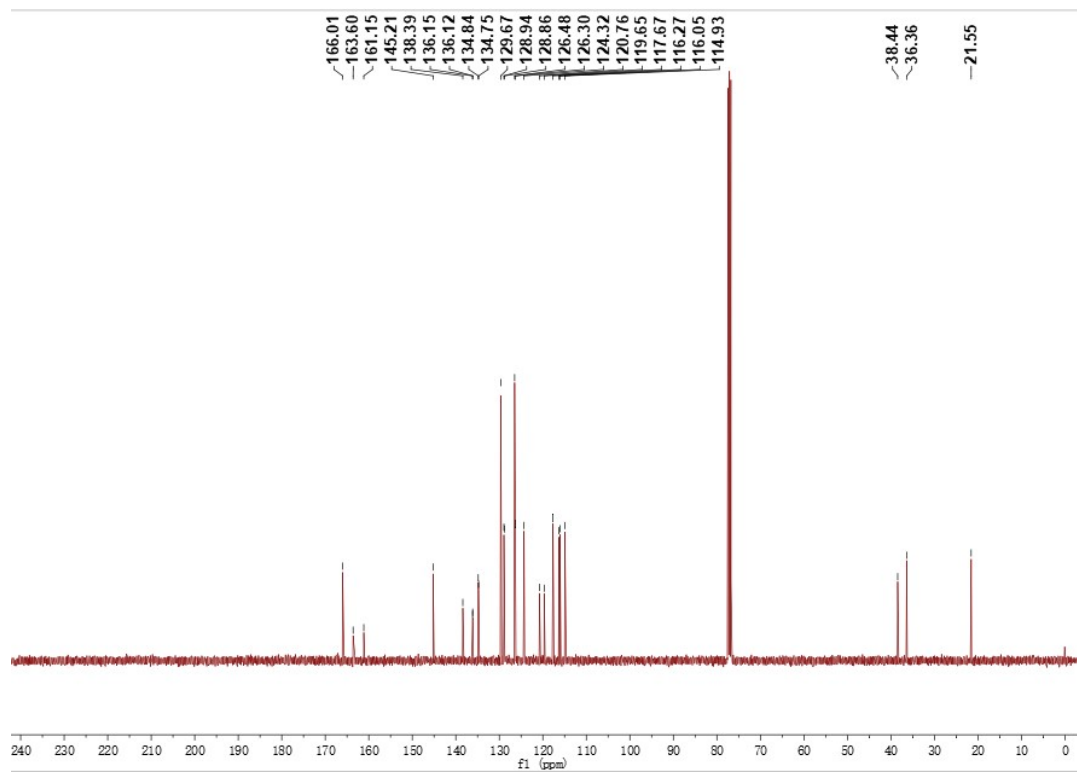

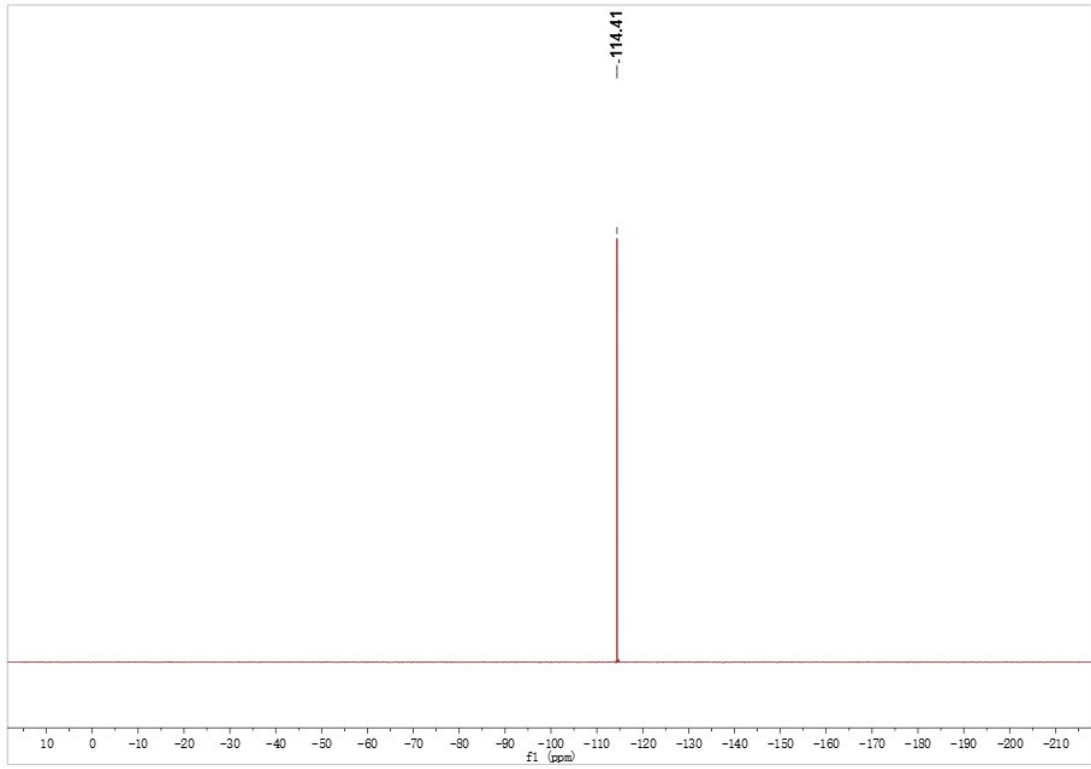

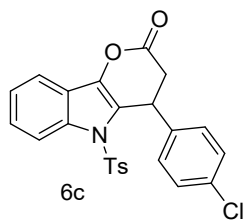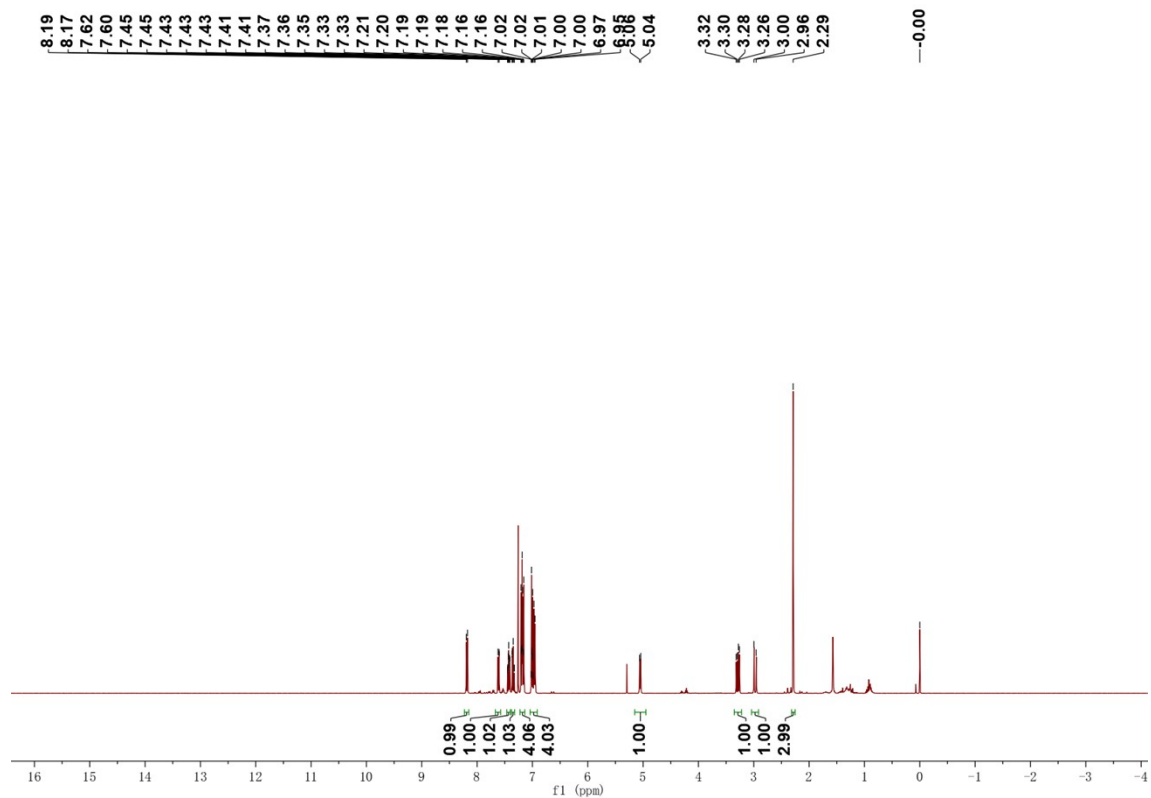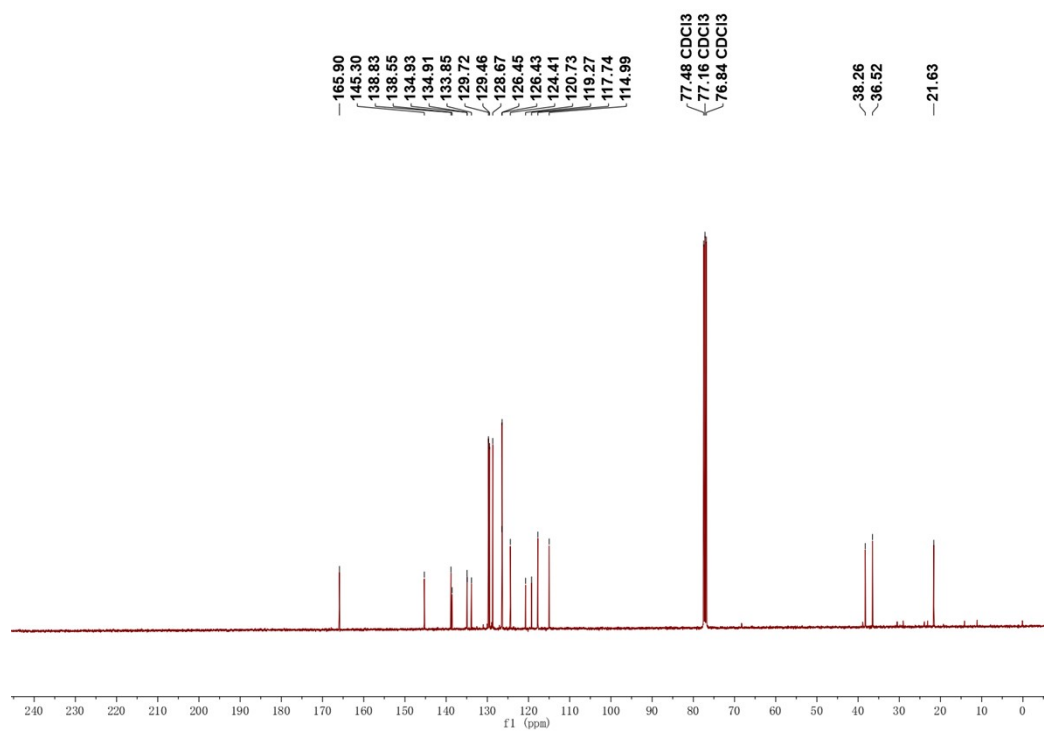

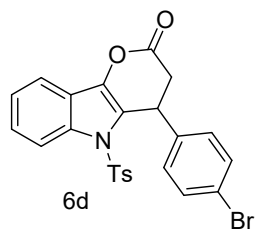

8.59  
8.20  
8.18  
7.62  
7.61  
7.45  
7.45  
7.44  
7.43  
7.41  
7.41  
7.37  
7.37  
7.35  
7.35  
7.34  
7.33  
7.33  
7.17  
7.15  
6.97  
6.95  
6.93  
6.93  
6.92  
5.05  
5.03  
3.32  
3.30  
3.28  
3.26  
2.99  
2.99  
2.95  
2.95  
2.30  
-0.00

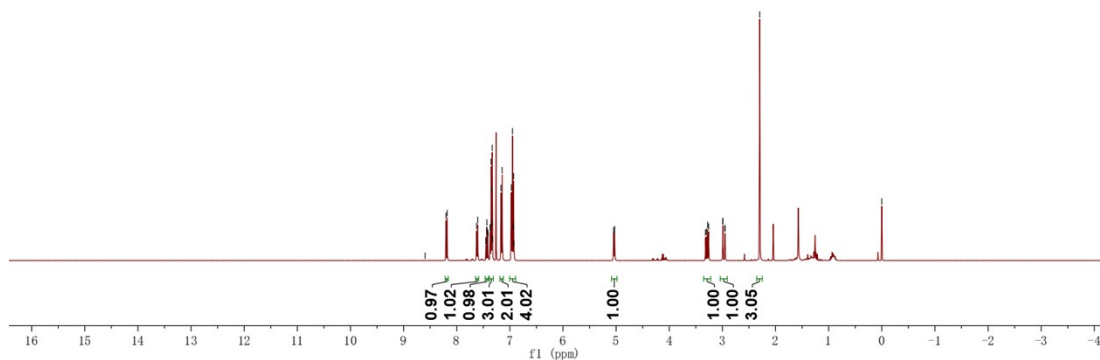

165.97  
145.22  
143.52  
137.97  
134.92  
134.67  
129.80  
127.39  
126.69  
126.38  
125.34  
125.33  
124.36  
120.93  
120.03  
117.88  
115.03  
39.07  
32.47  
21.67

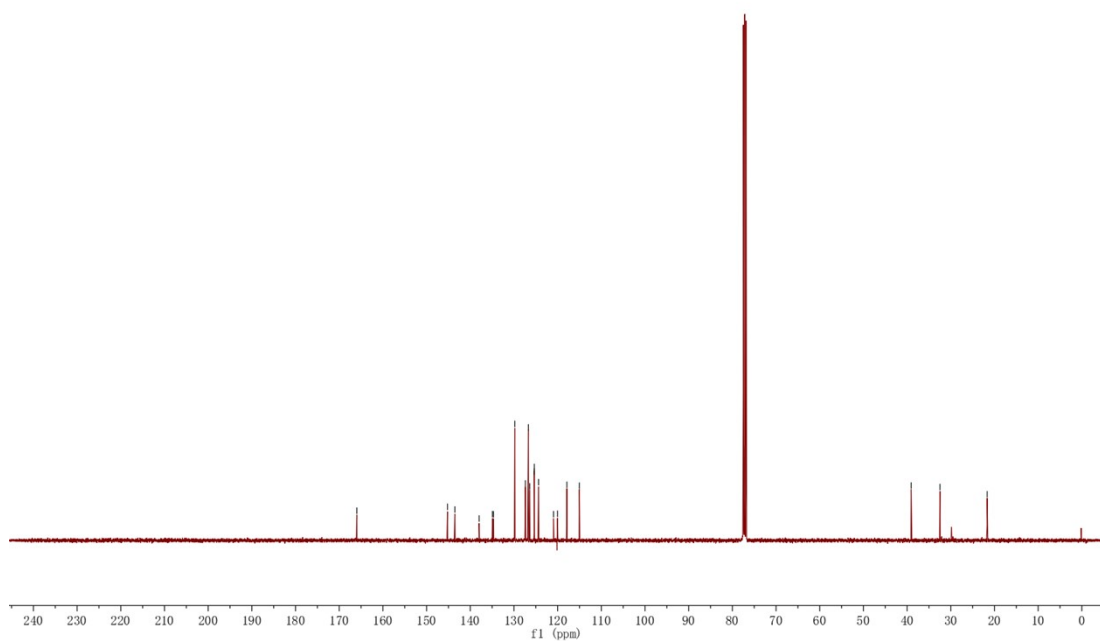

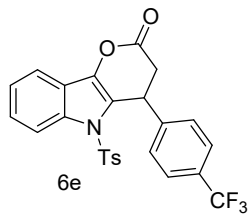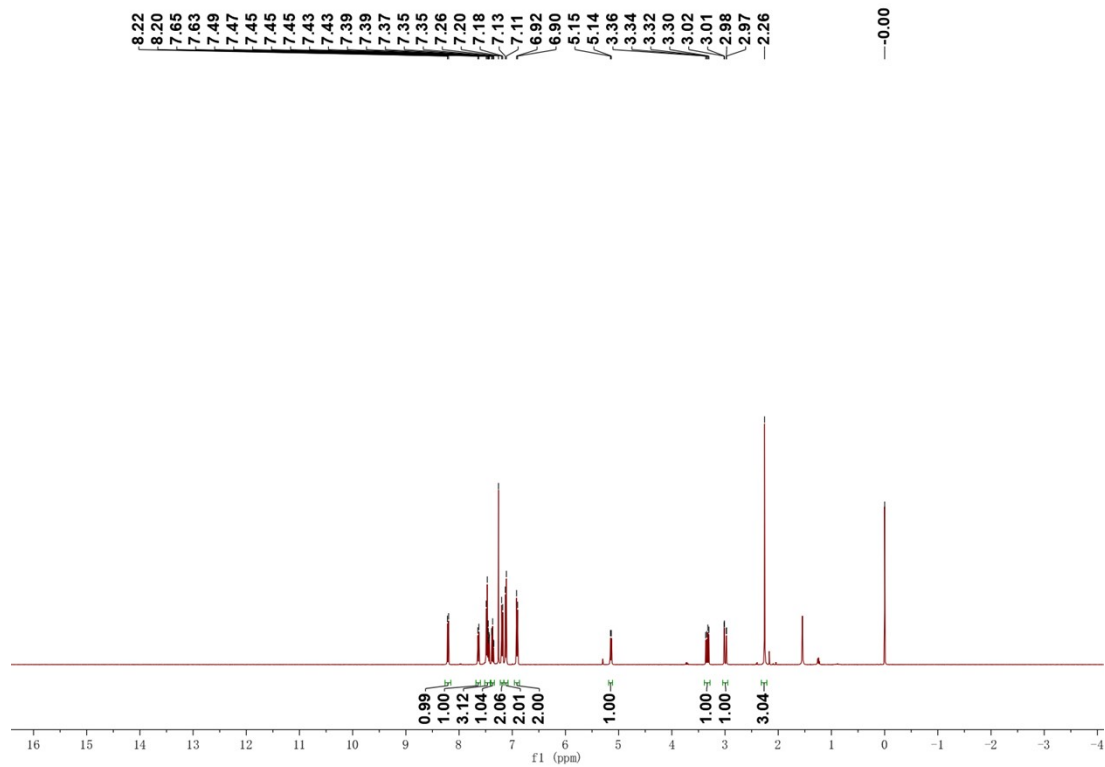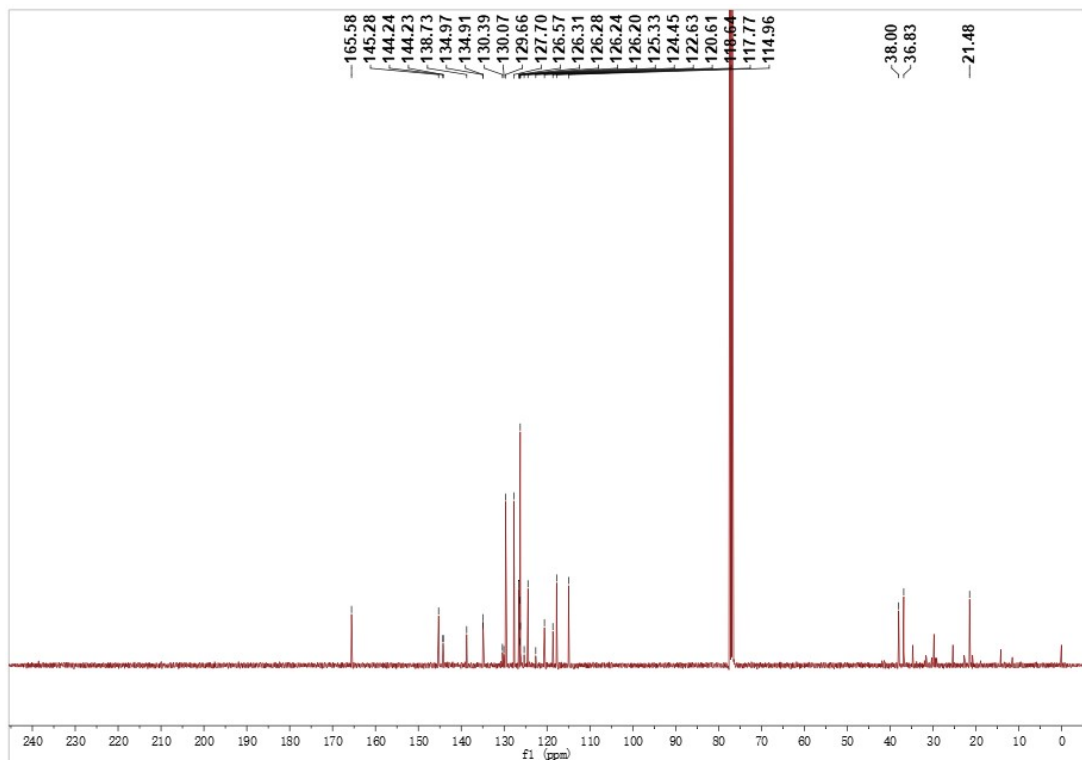

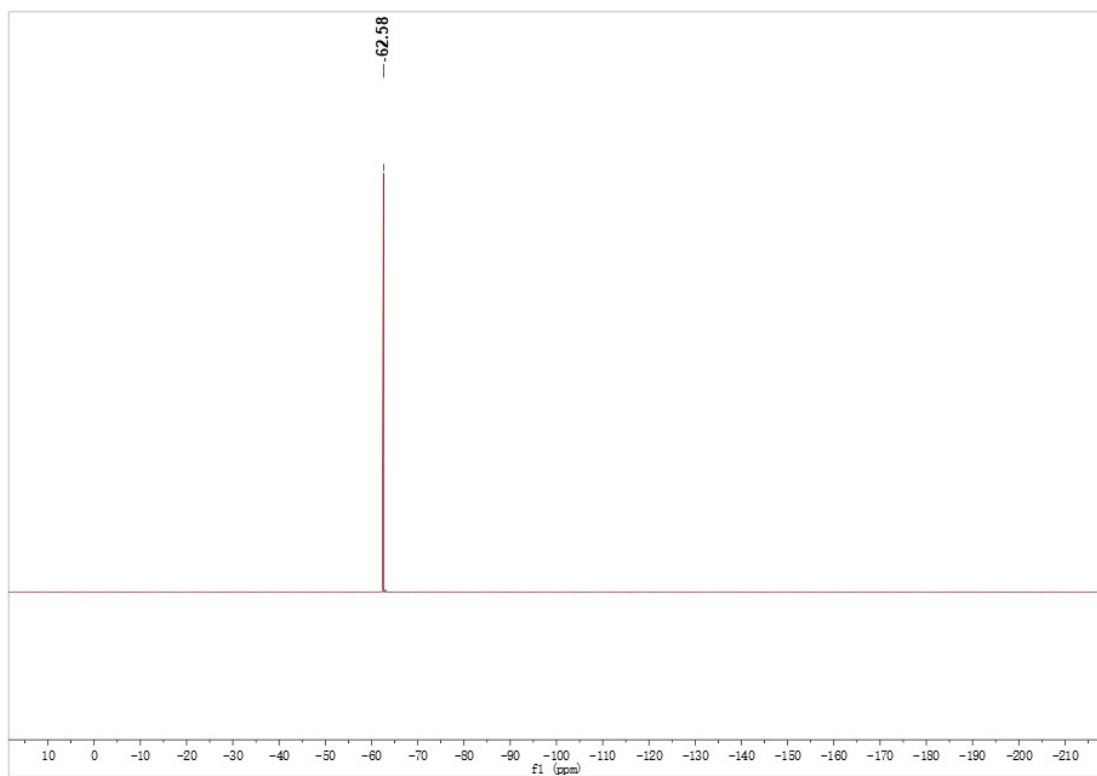

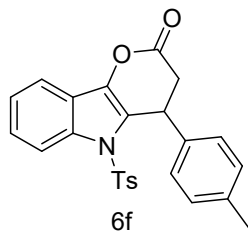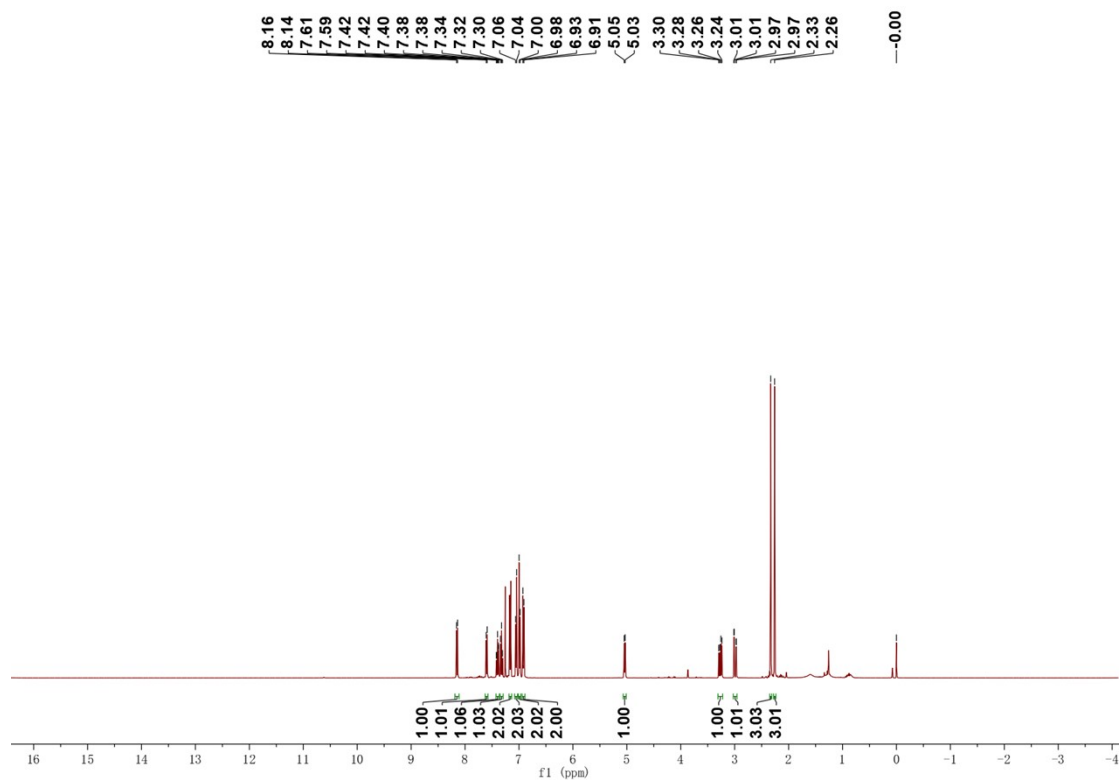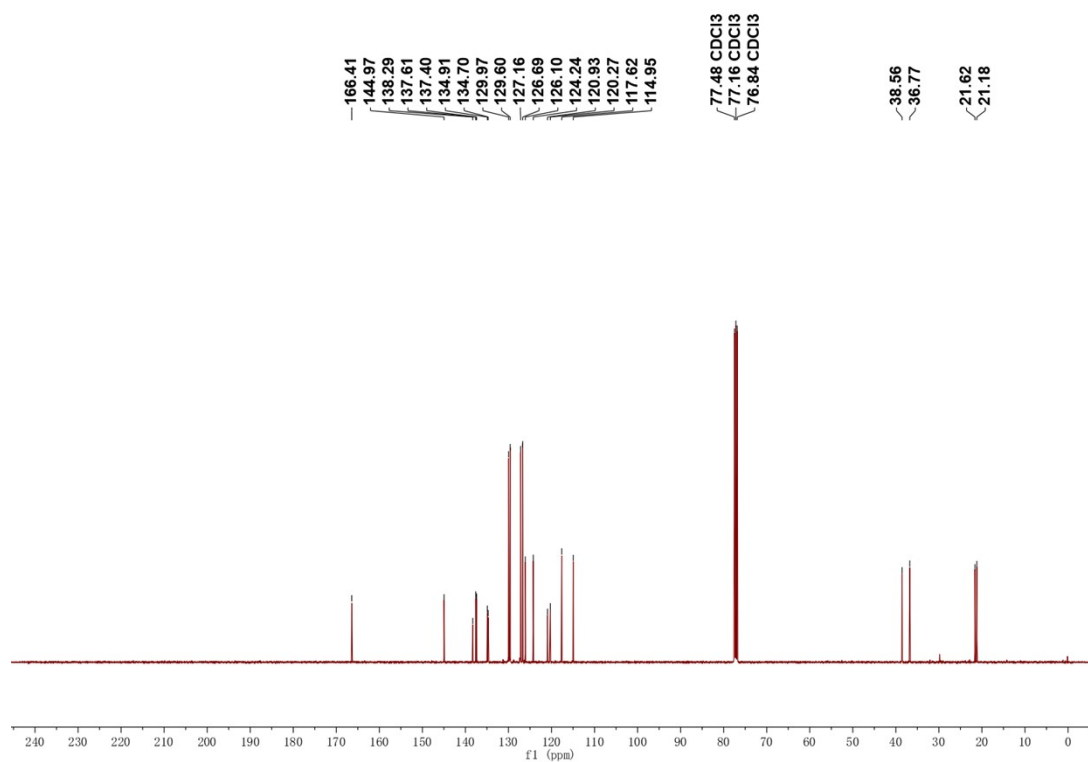

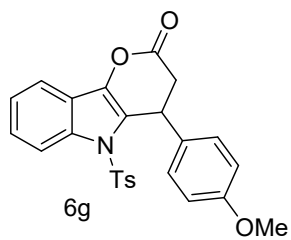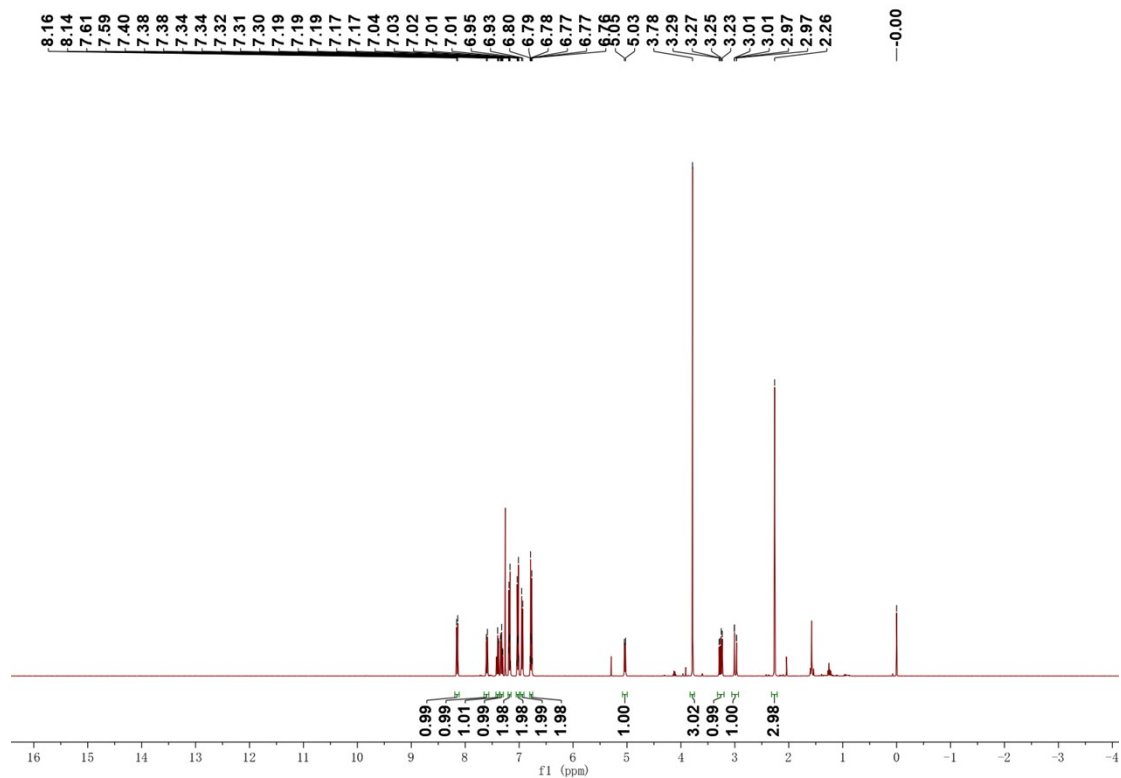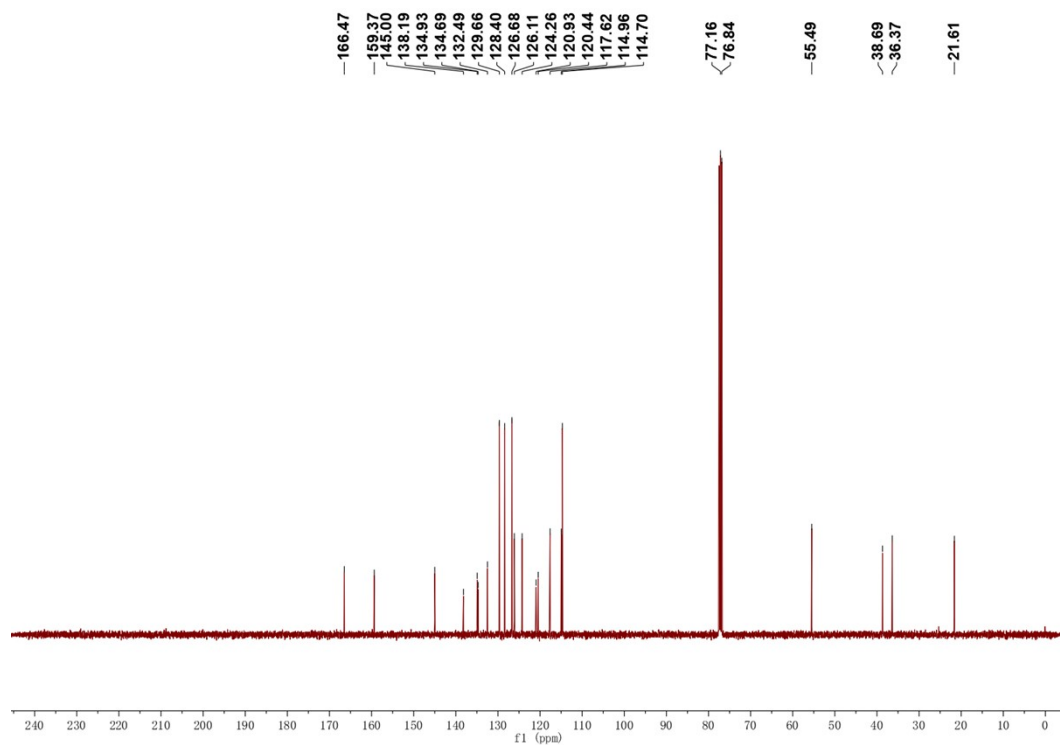



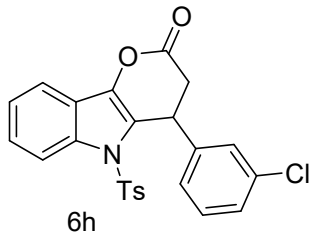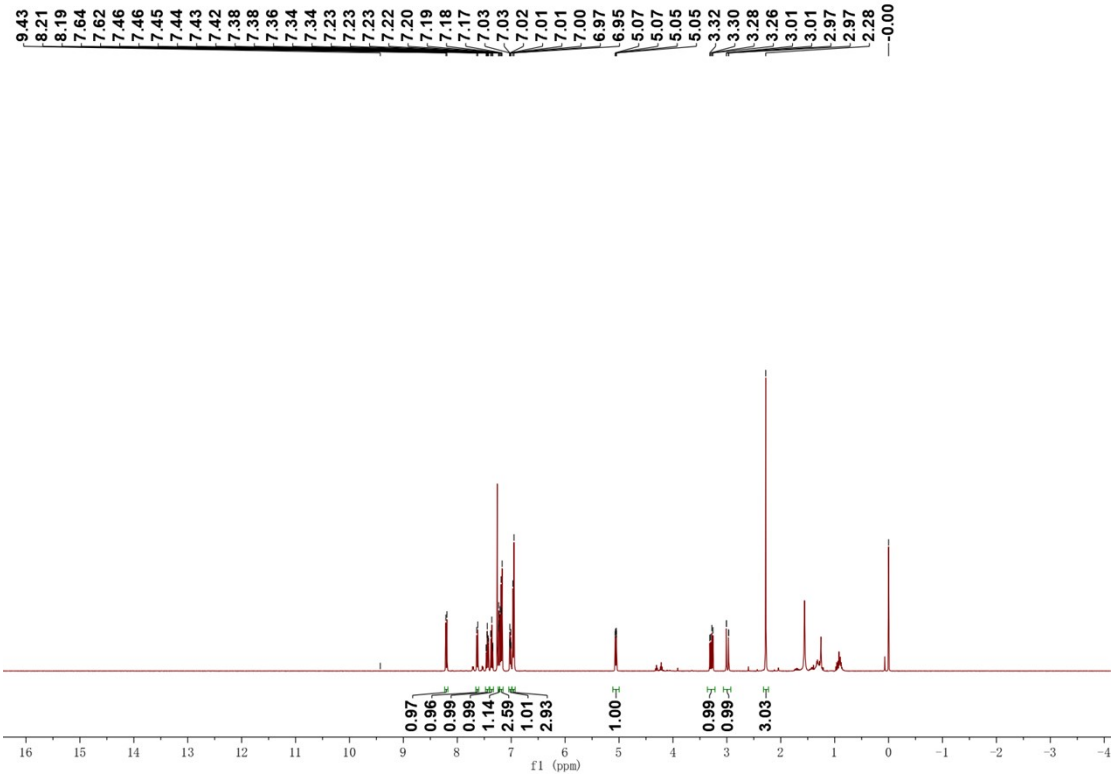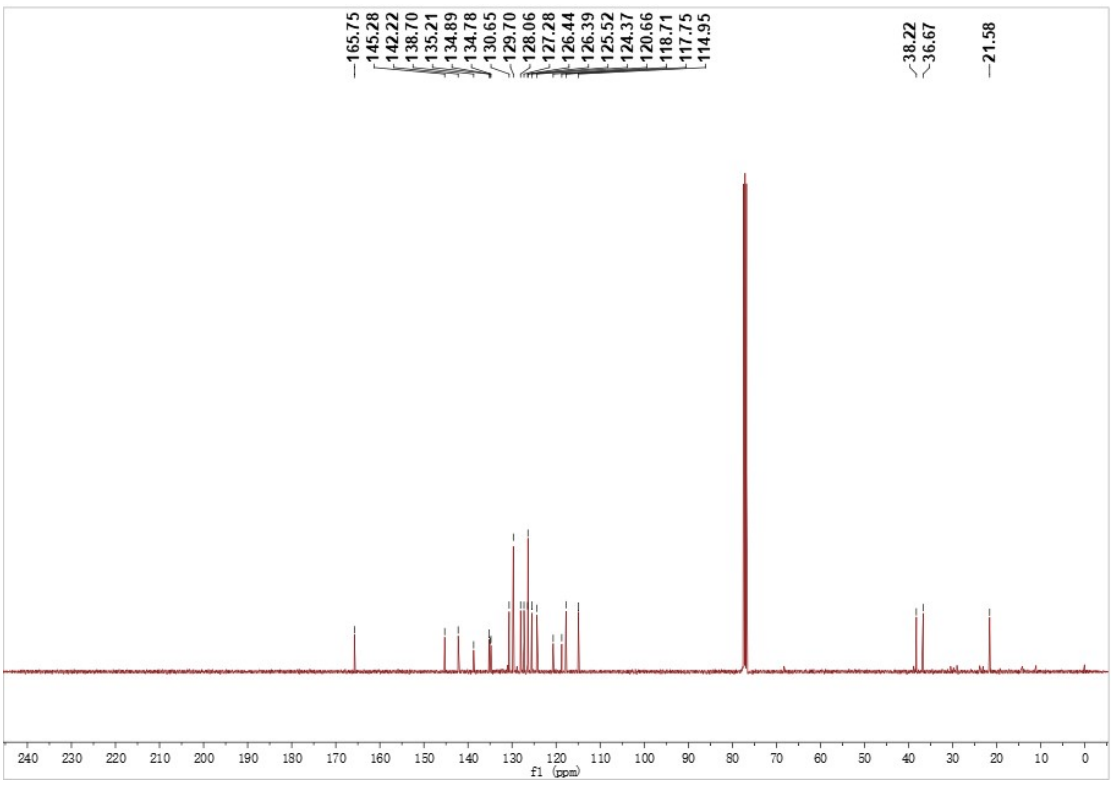

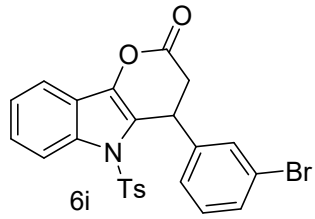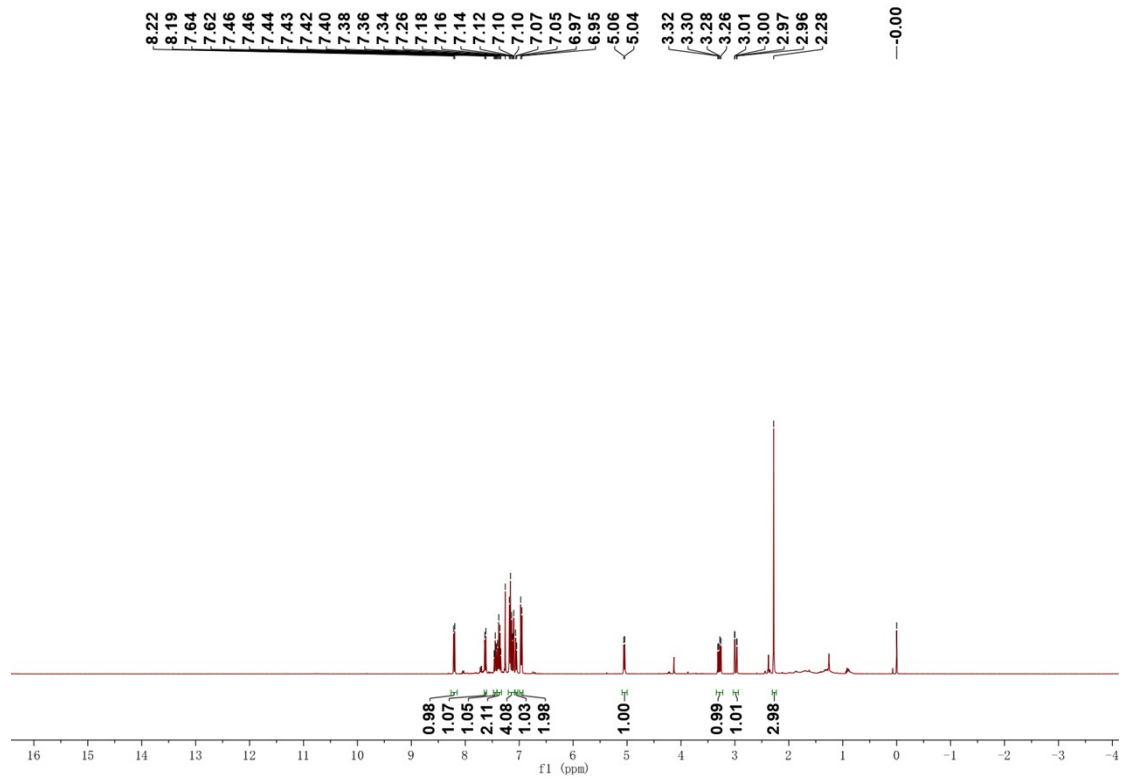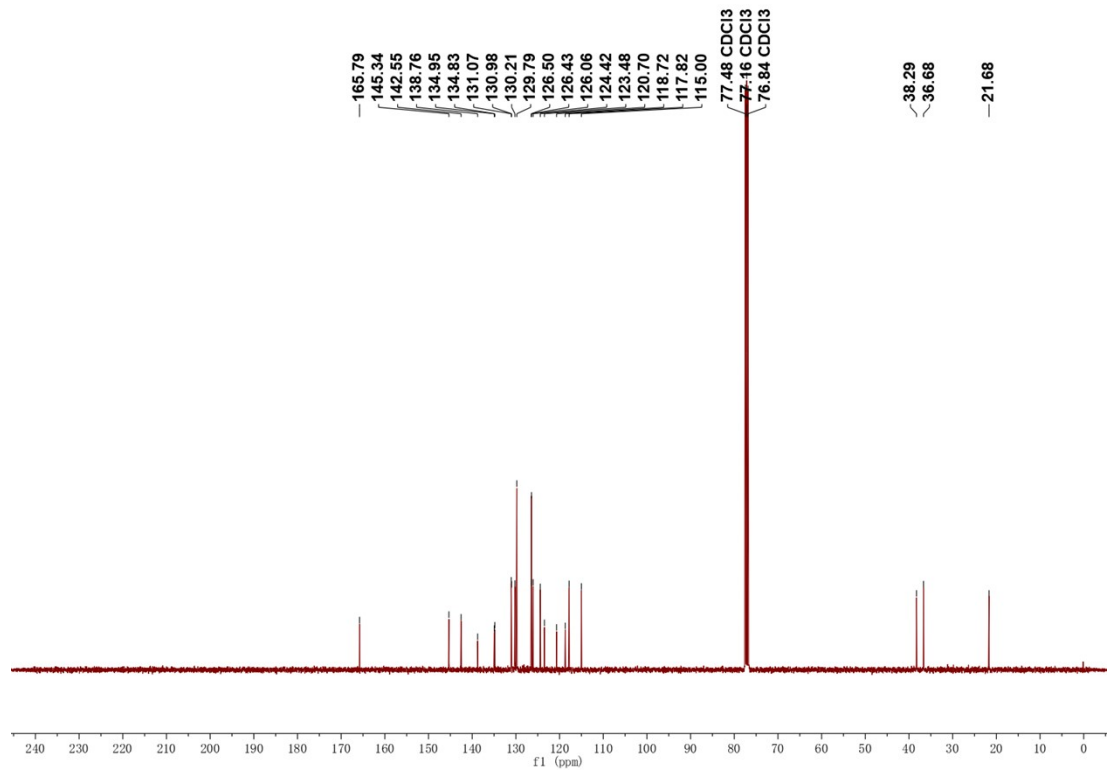

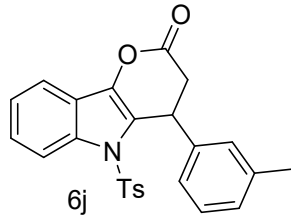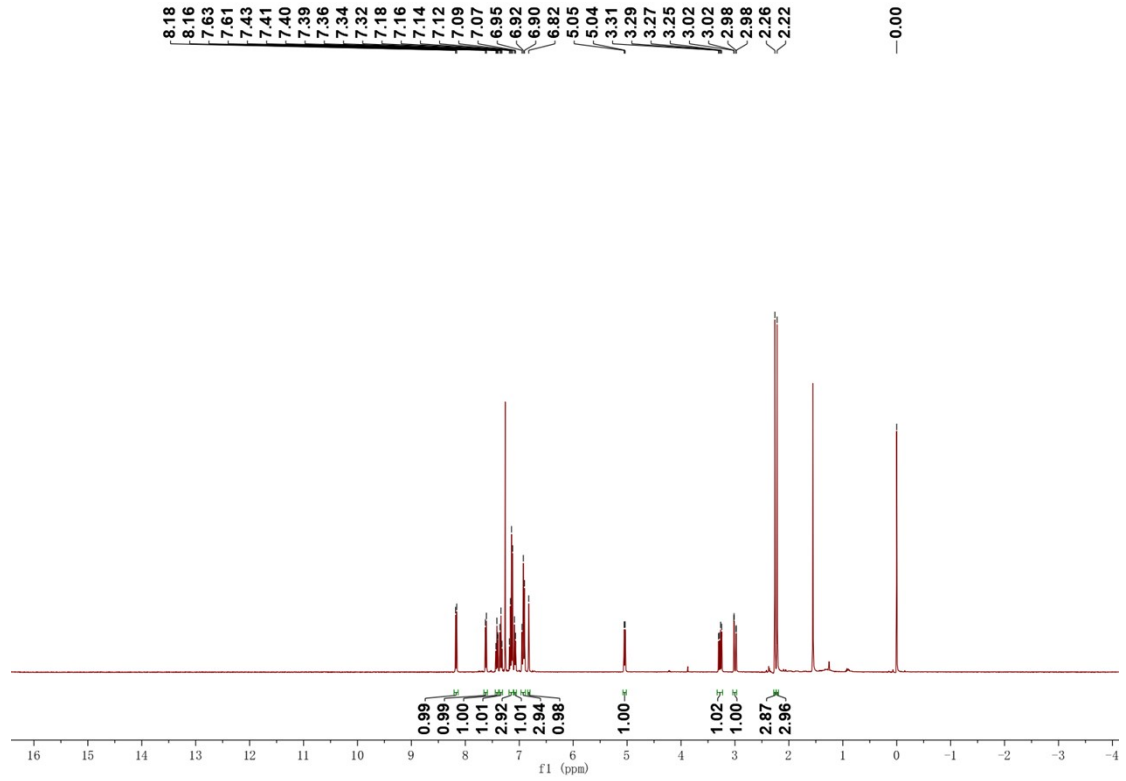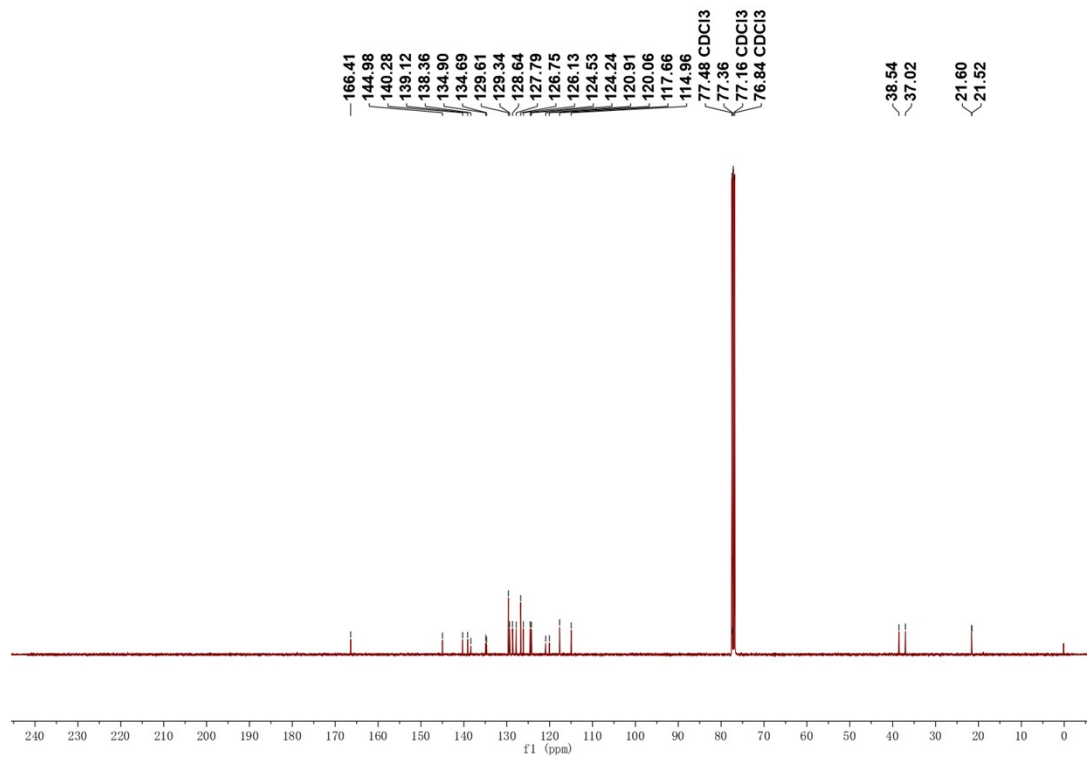

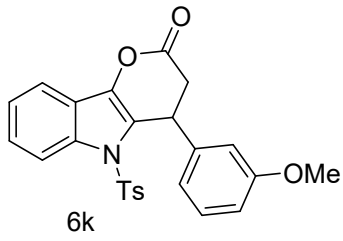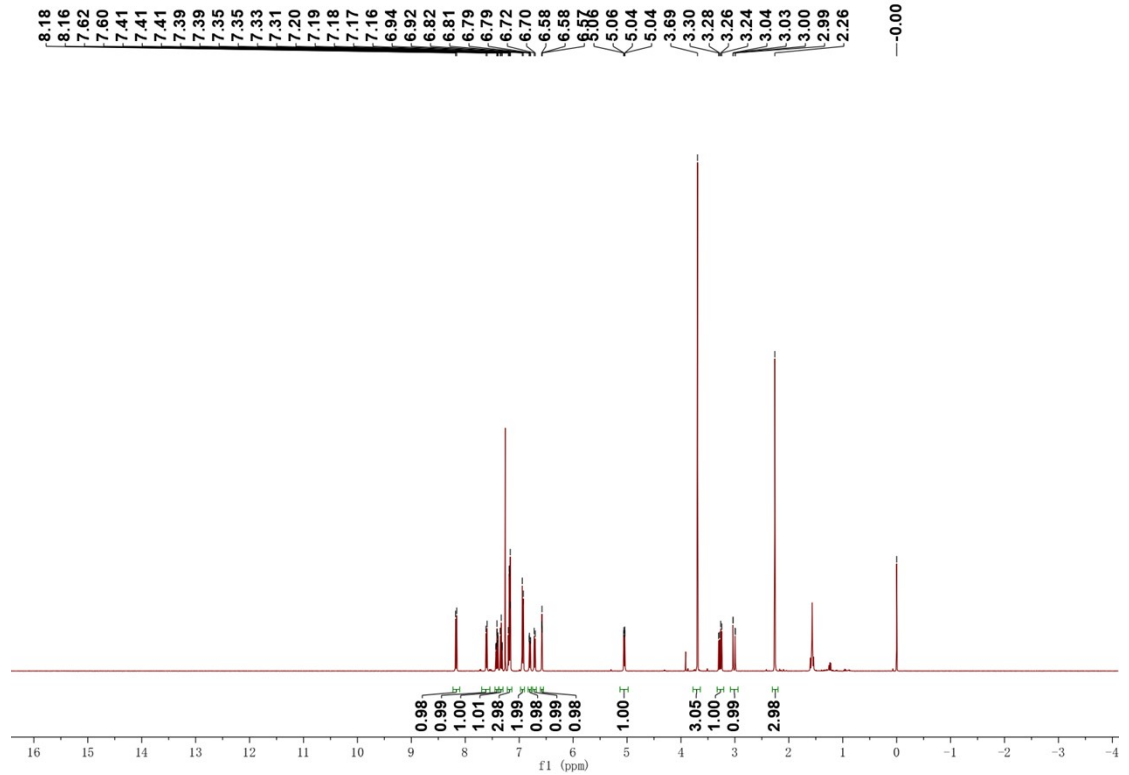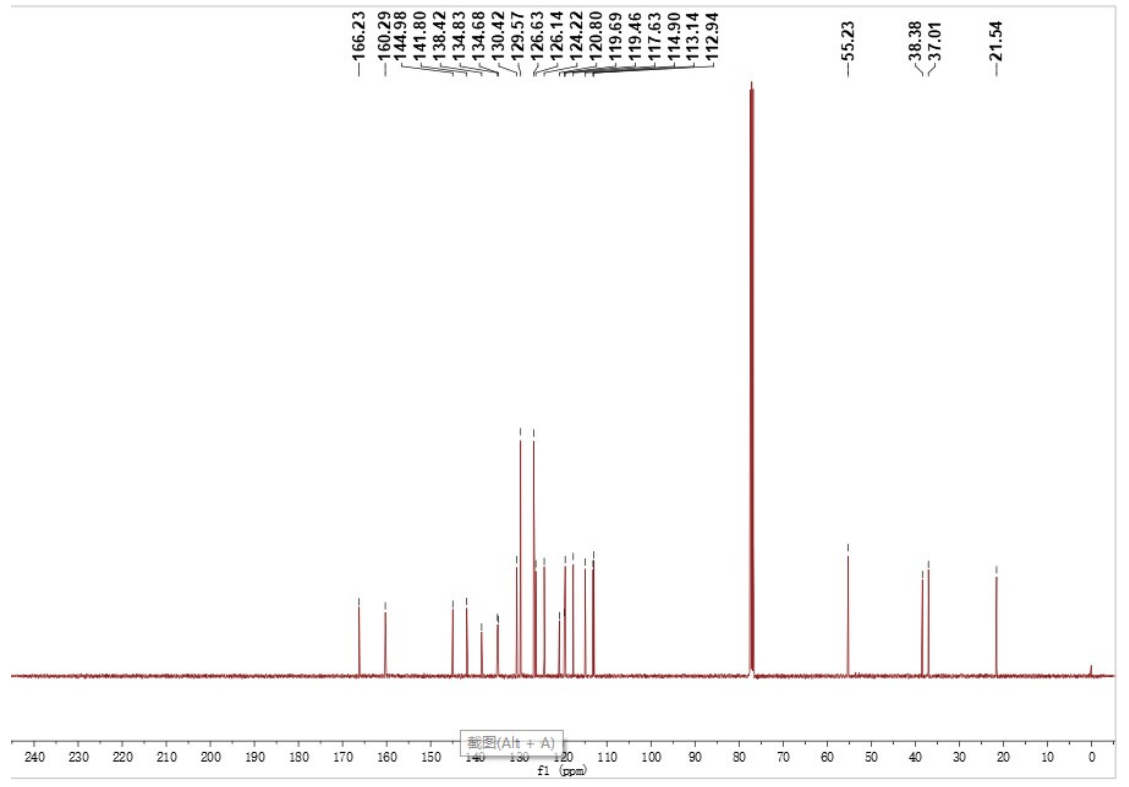

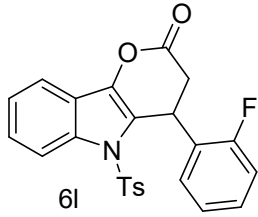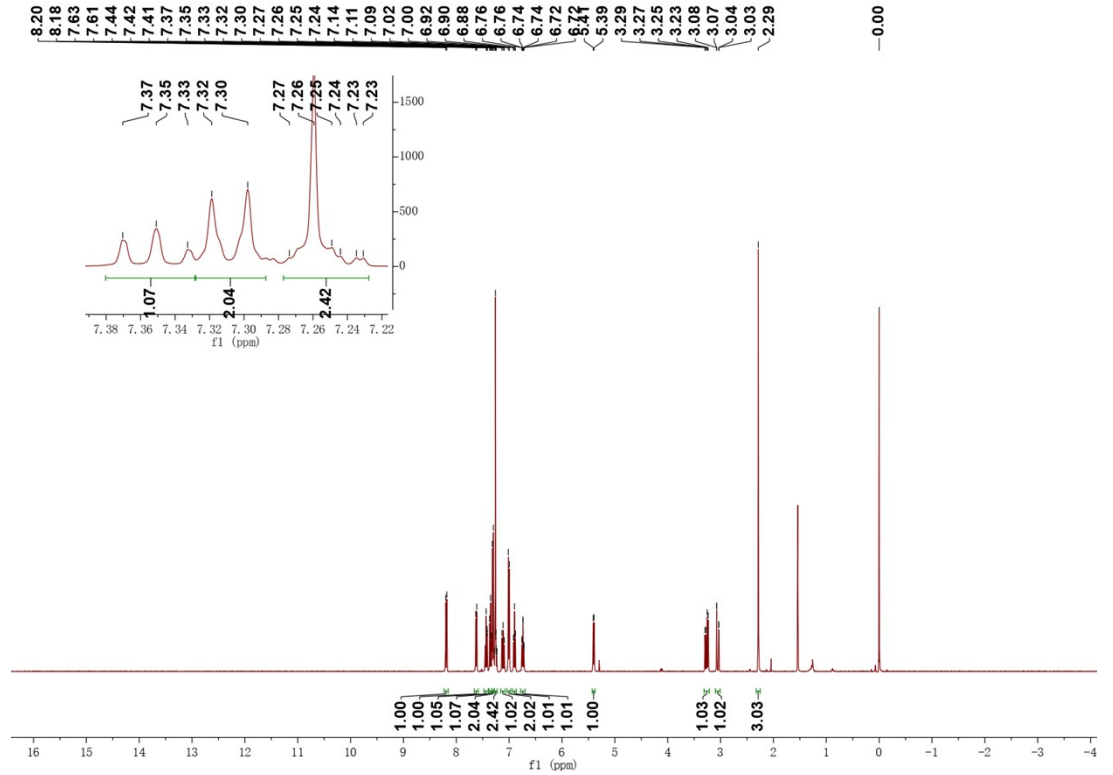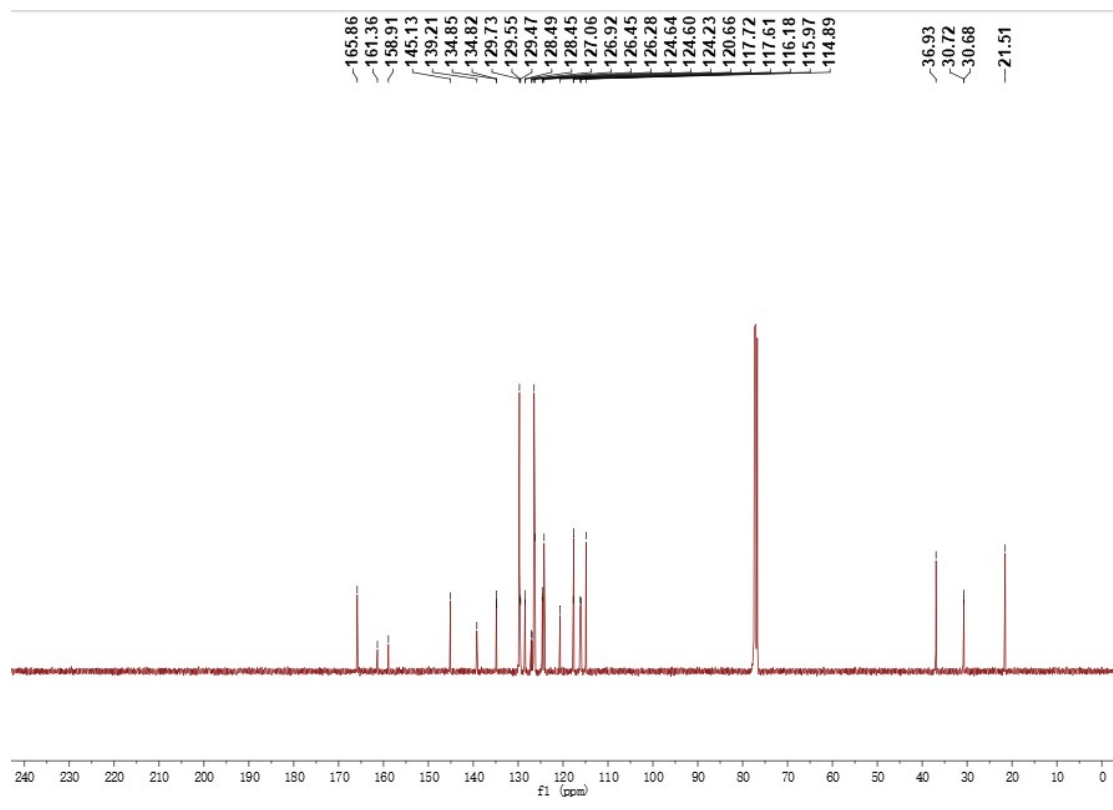

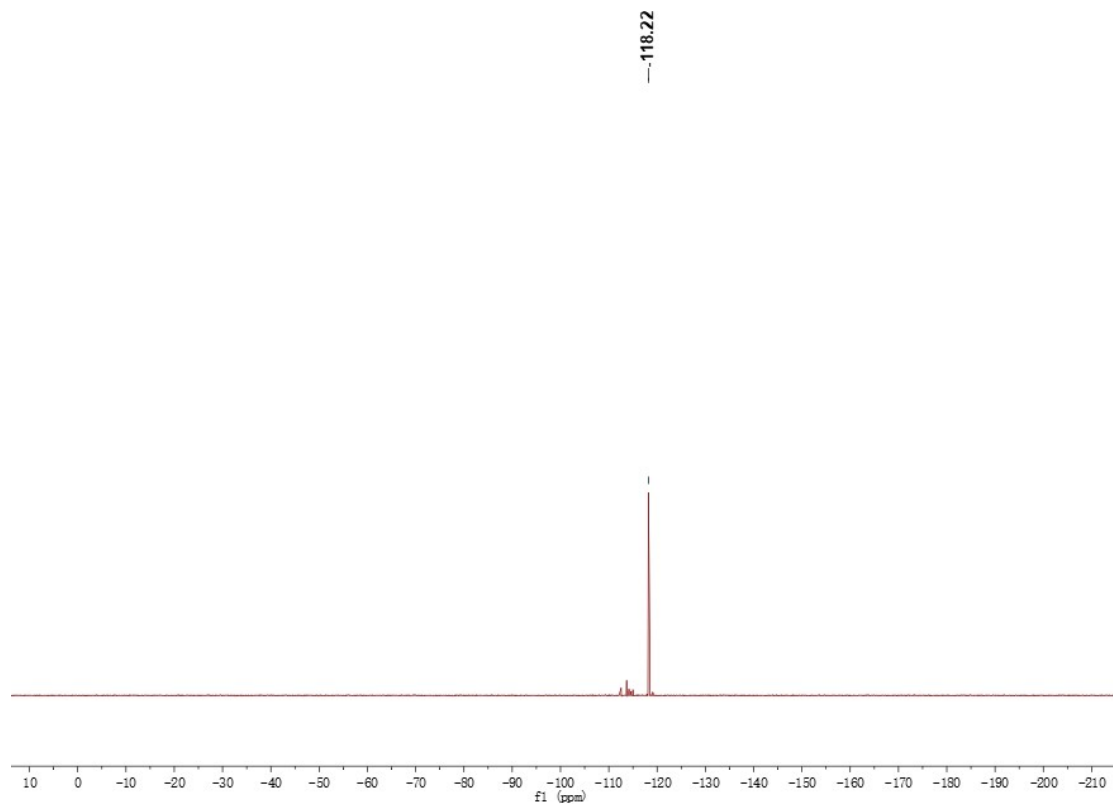

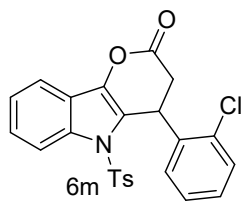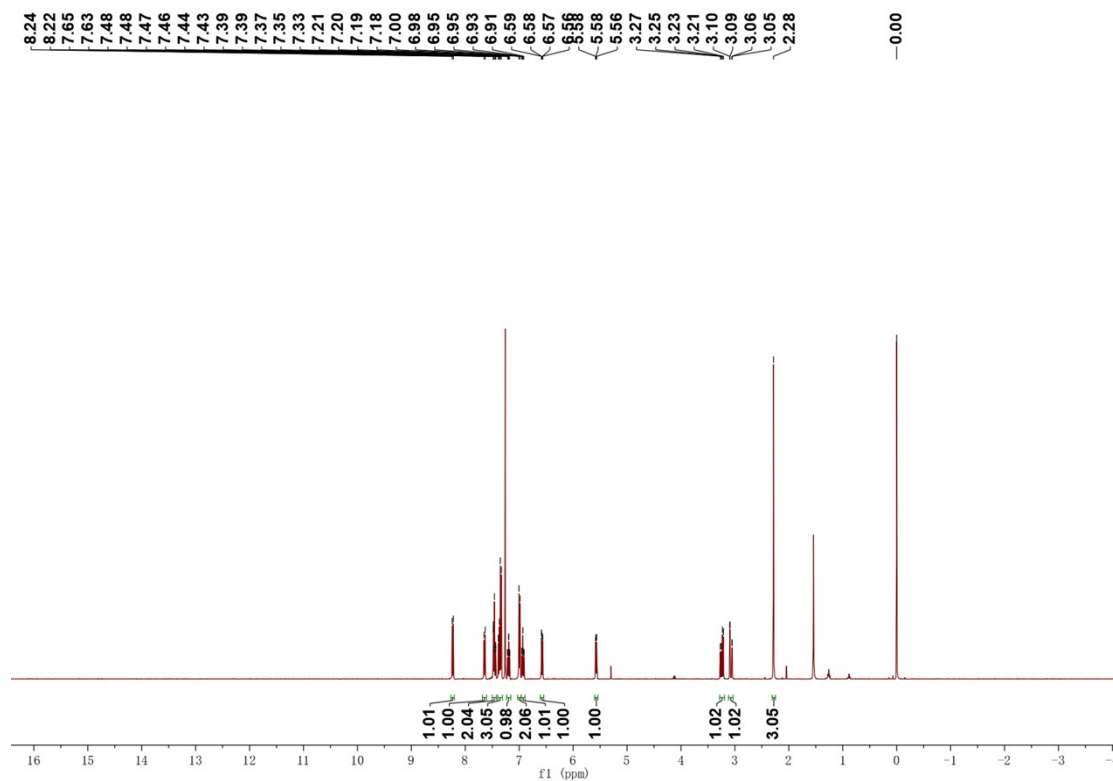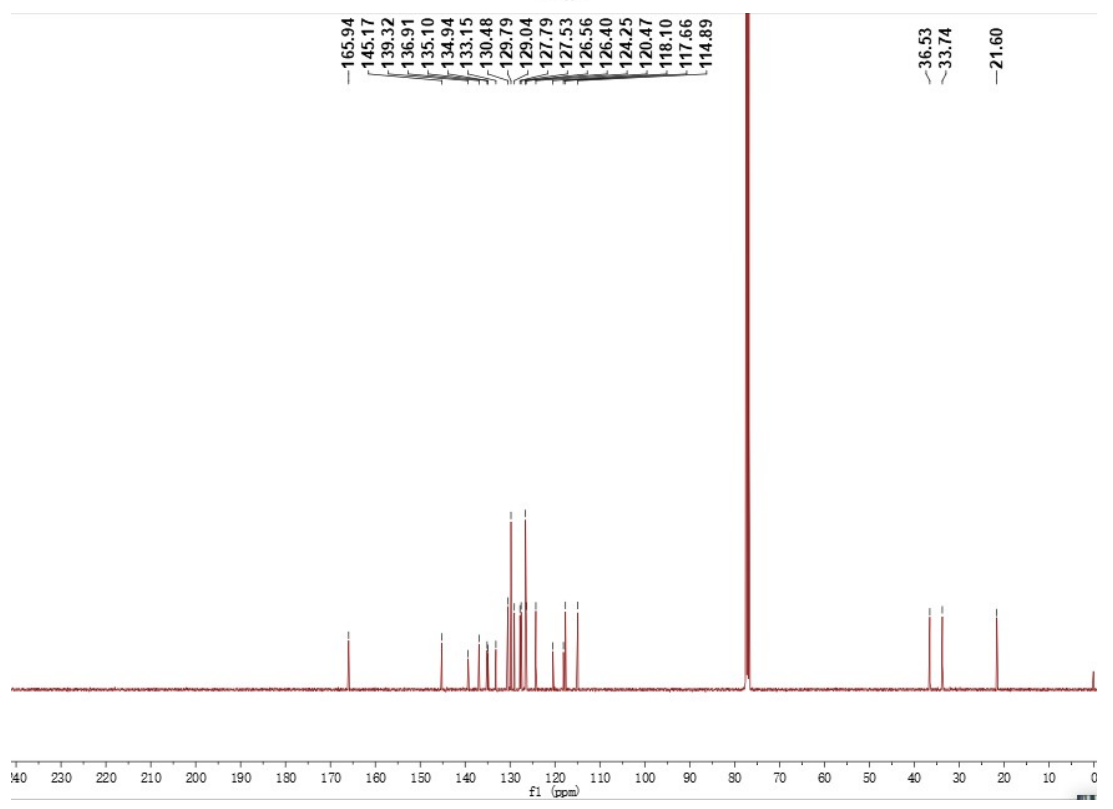

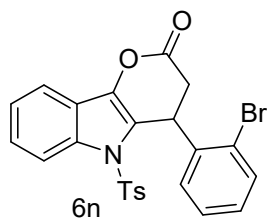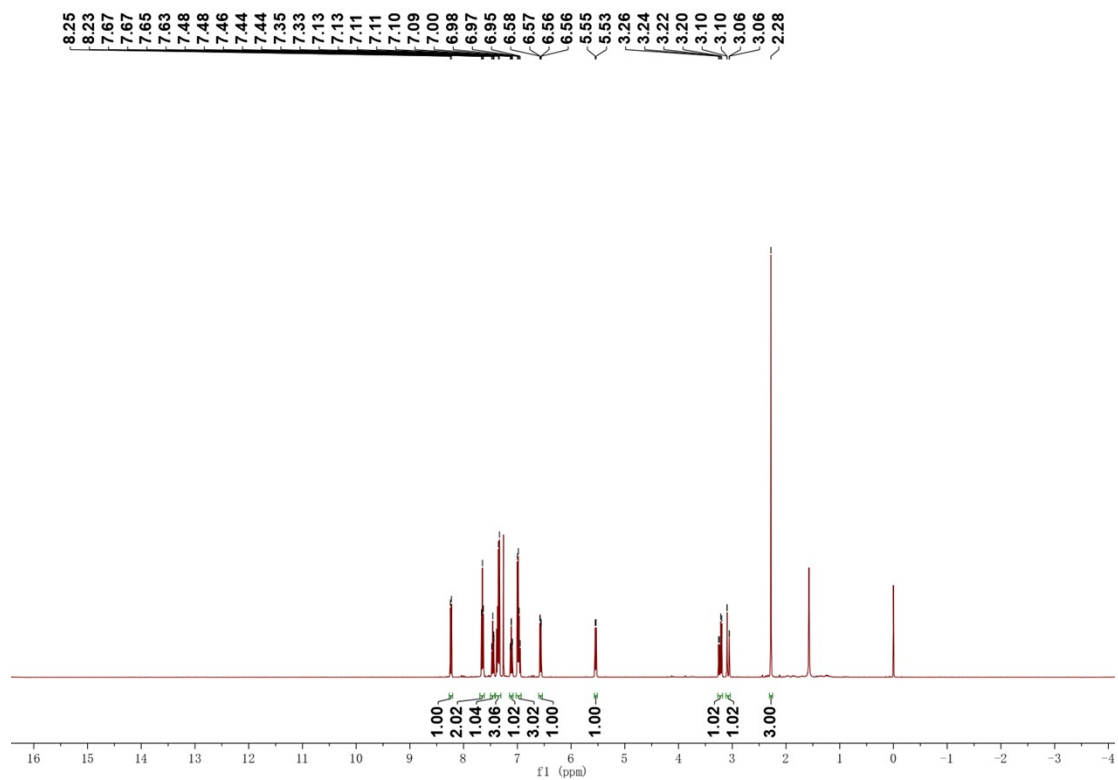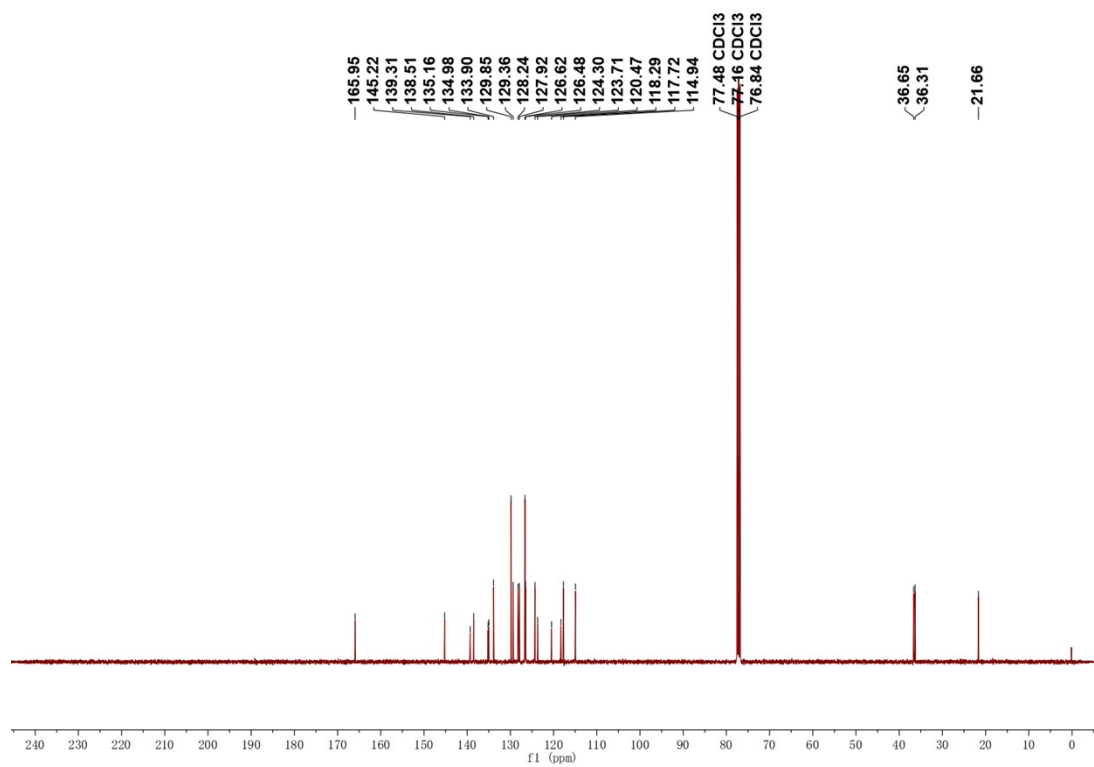



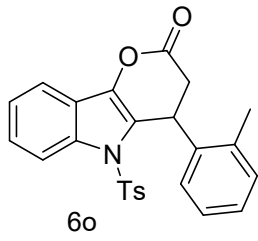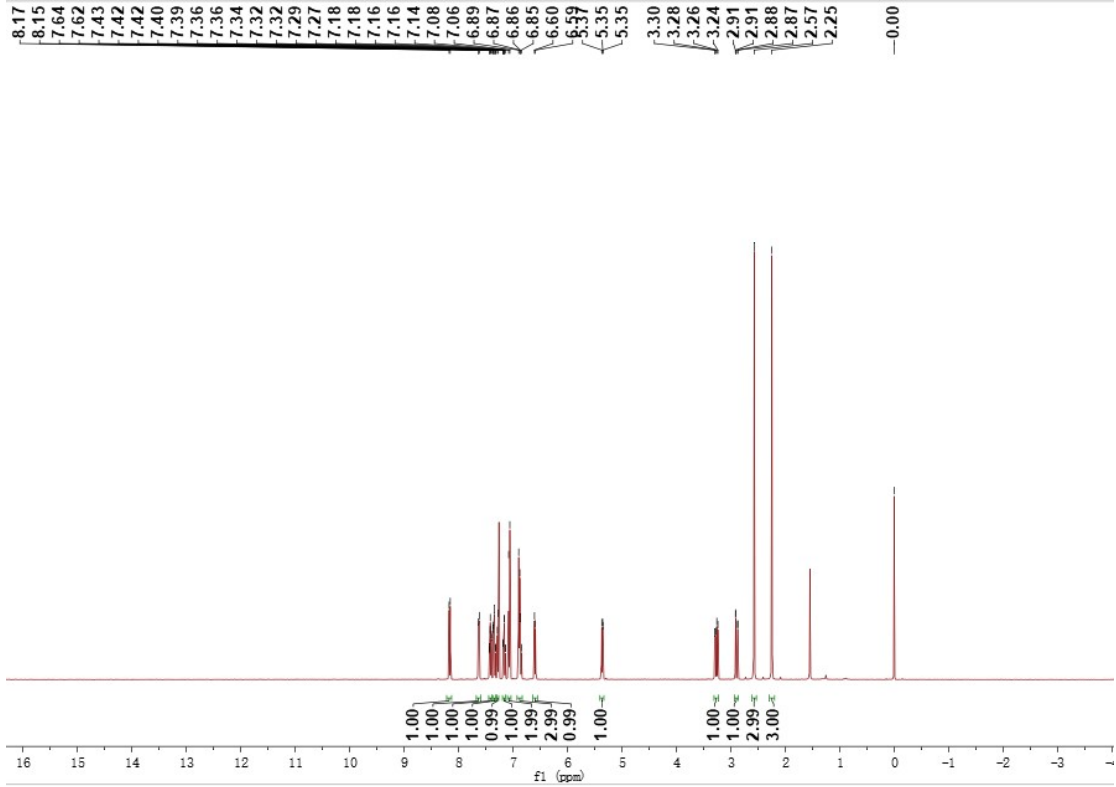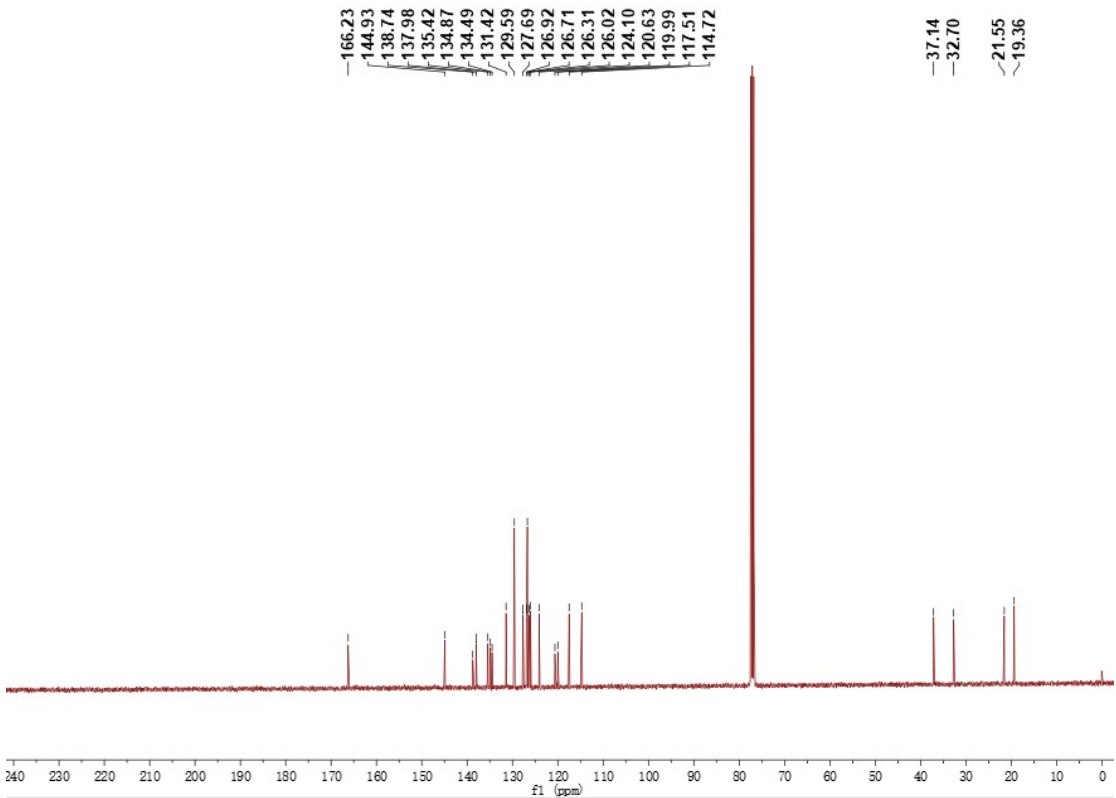

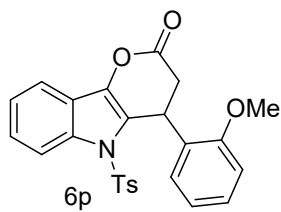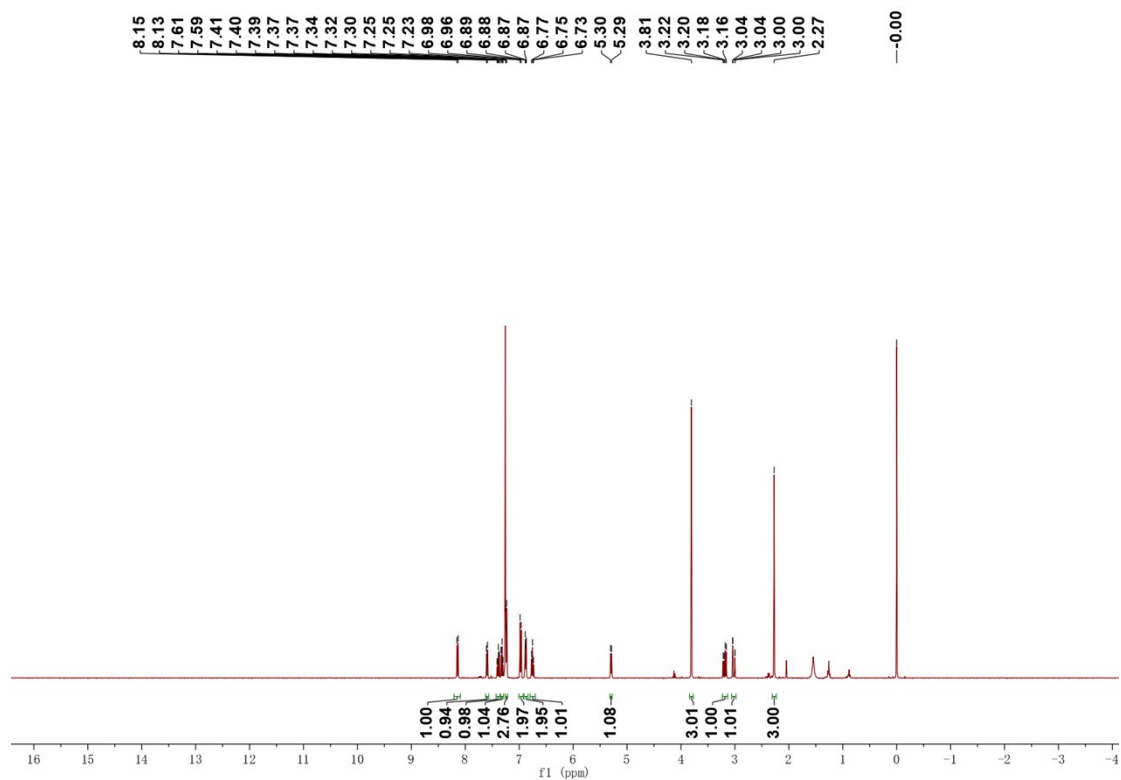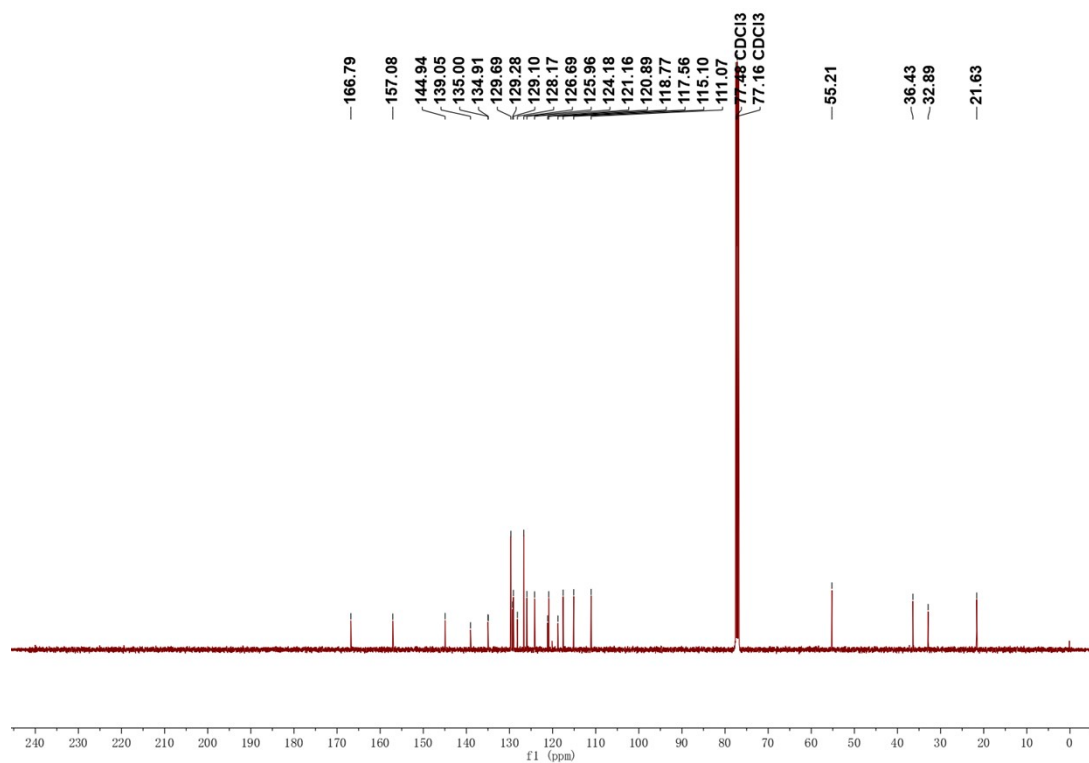

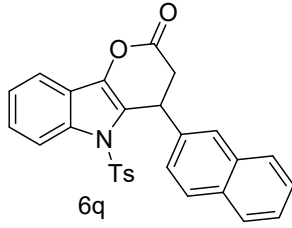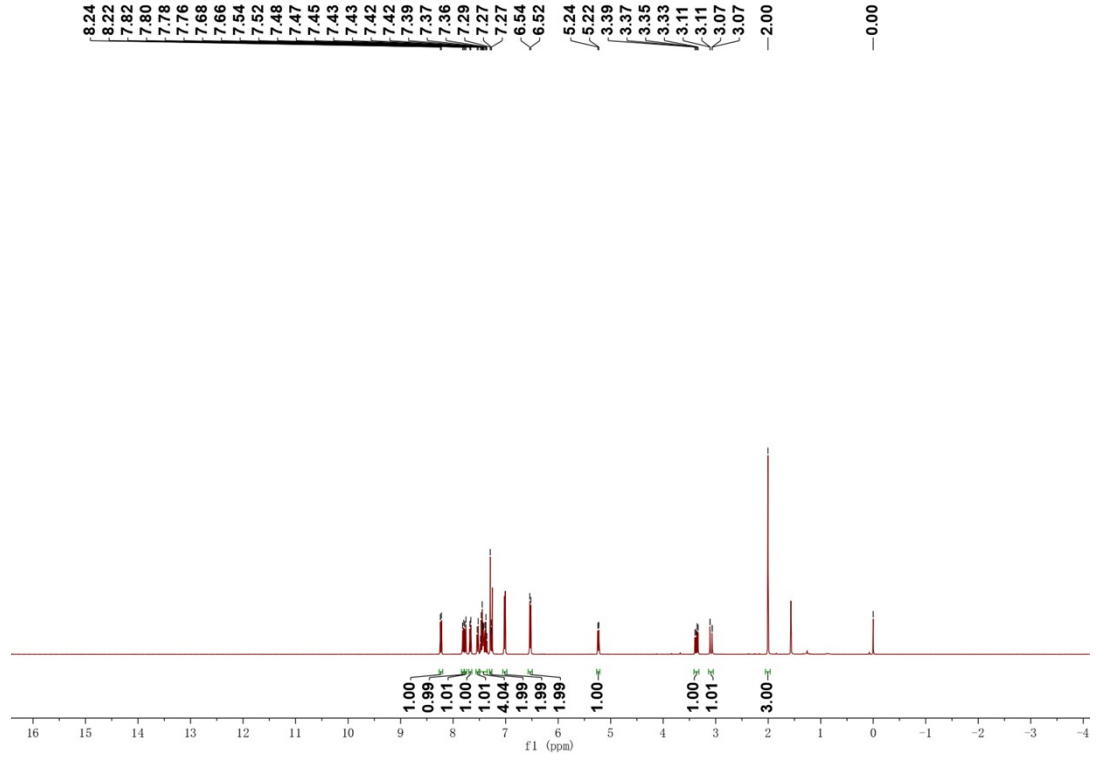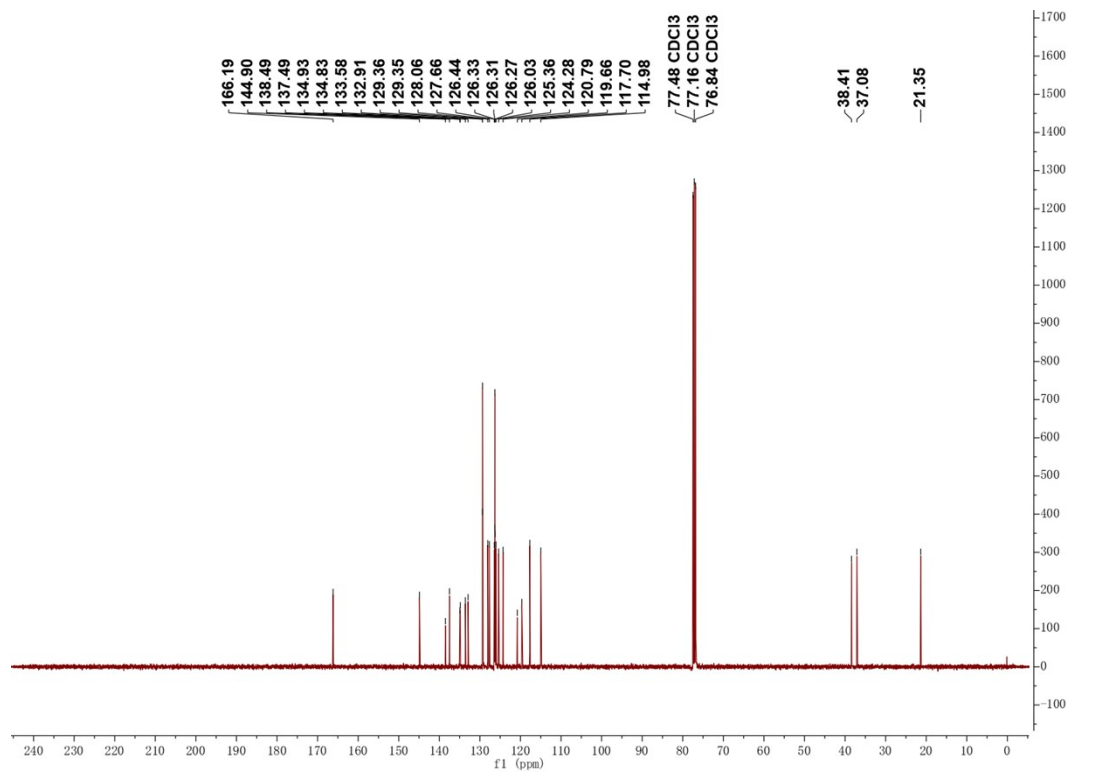

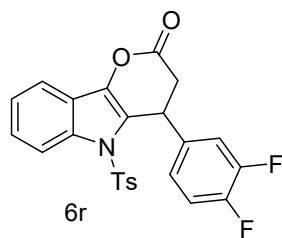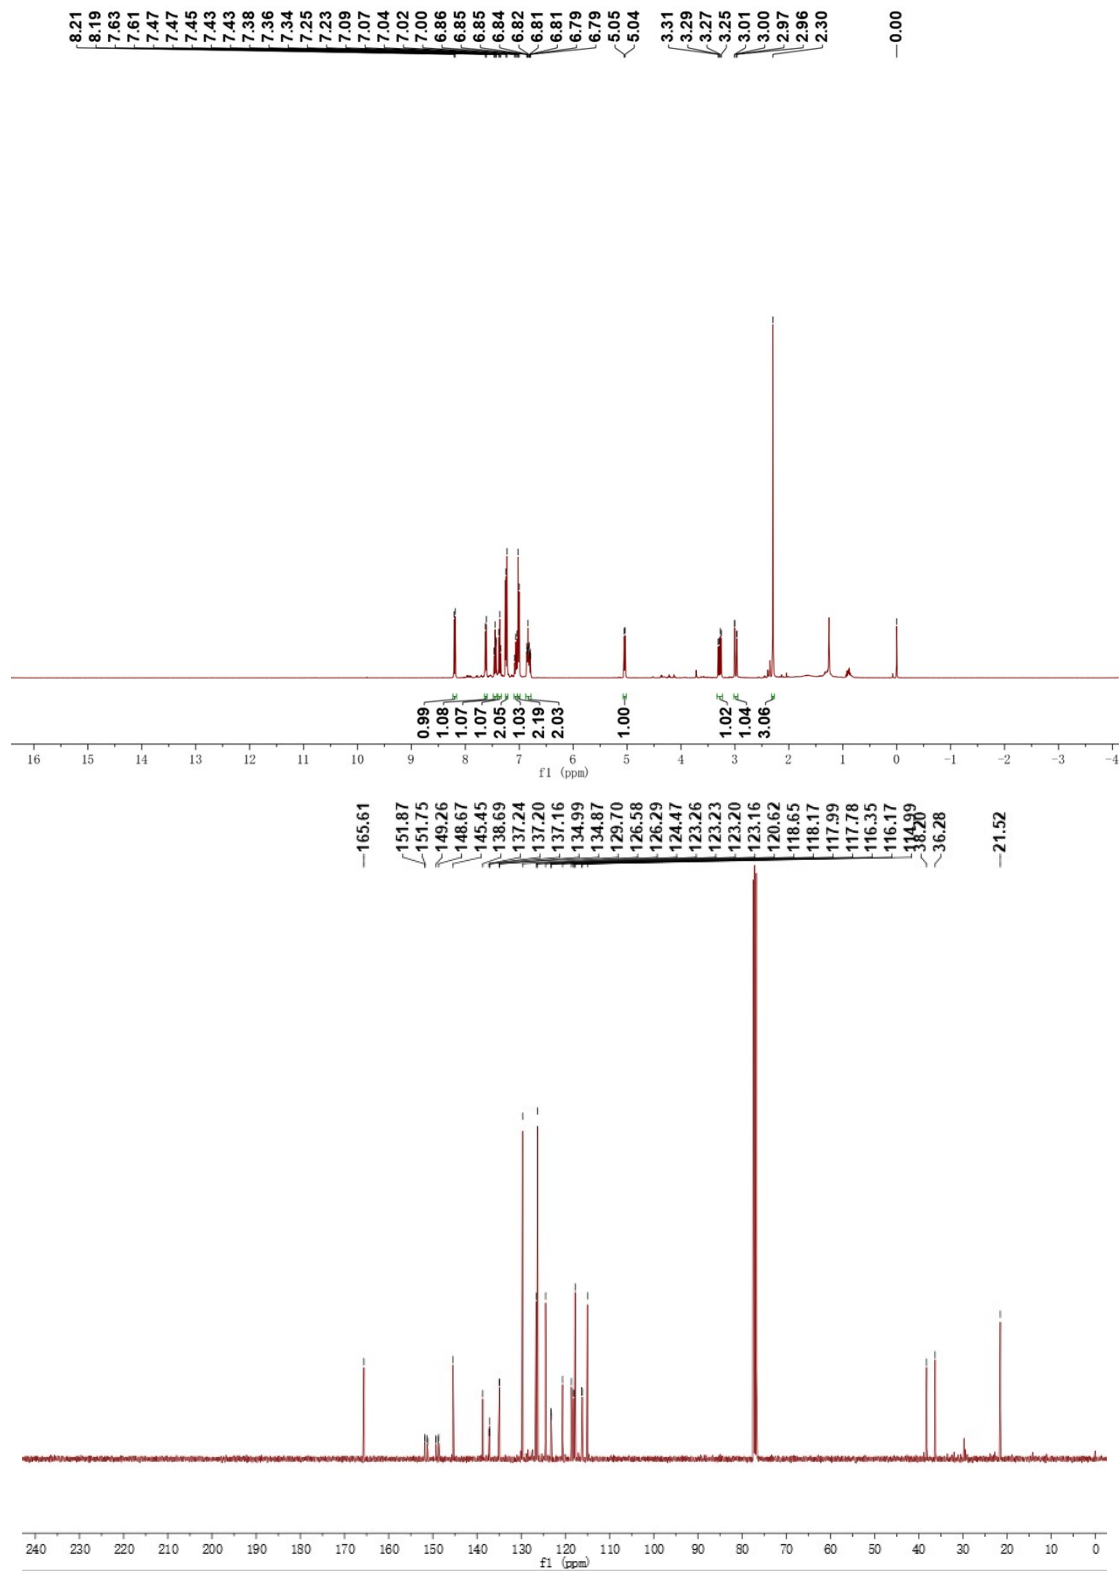

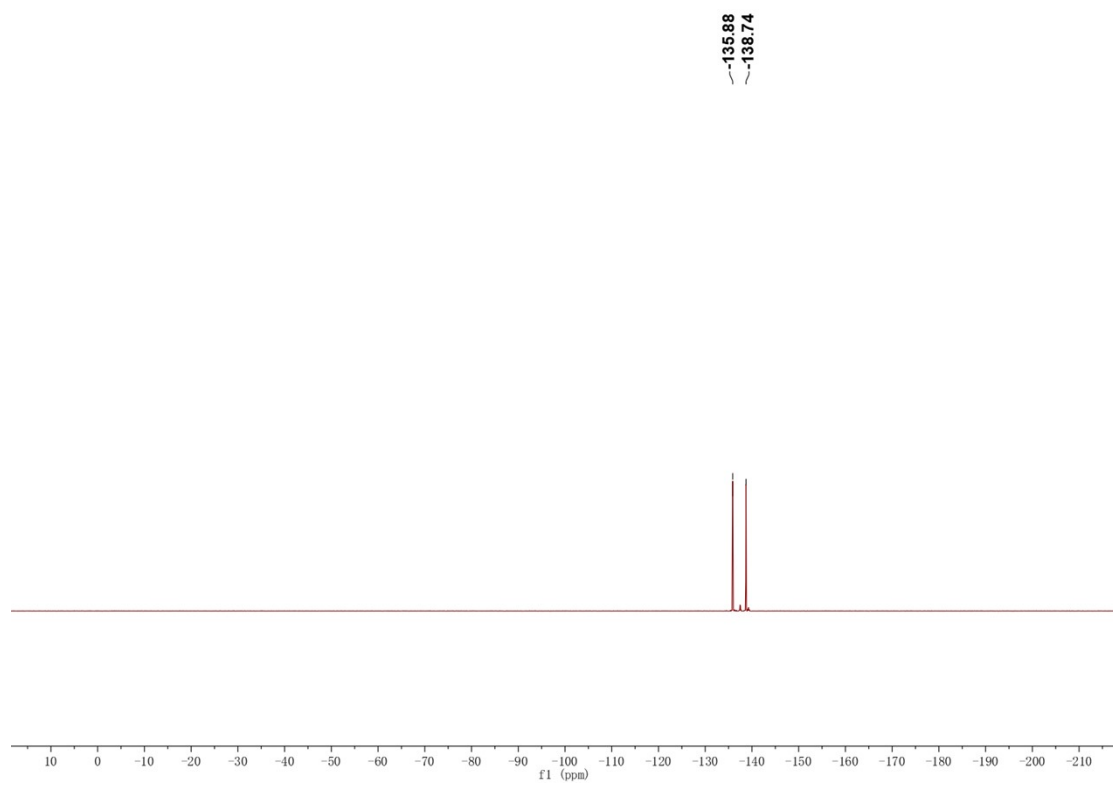

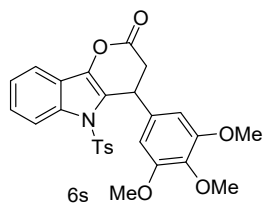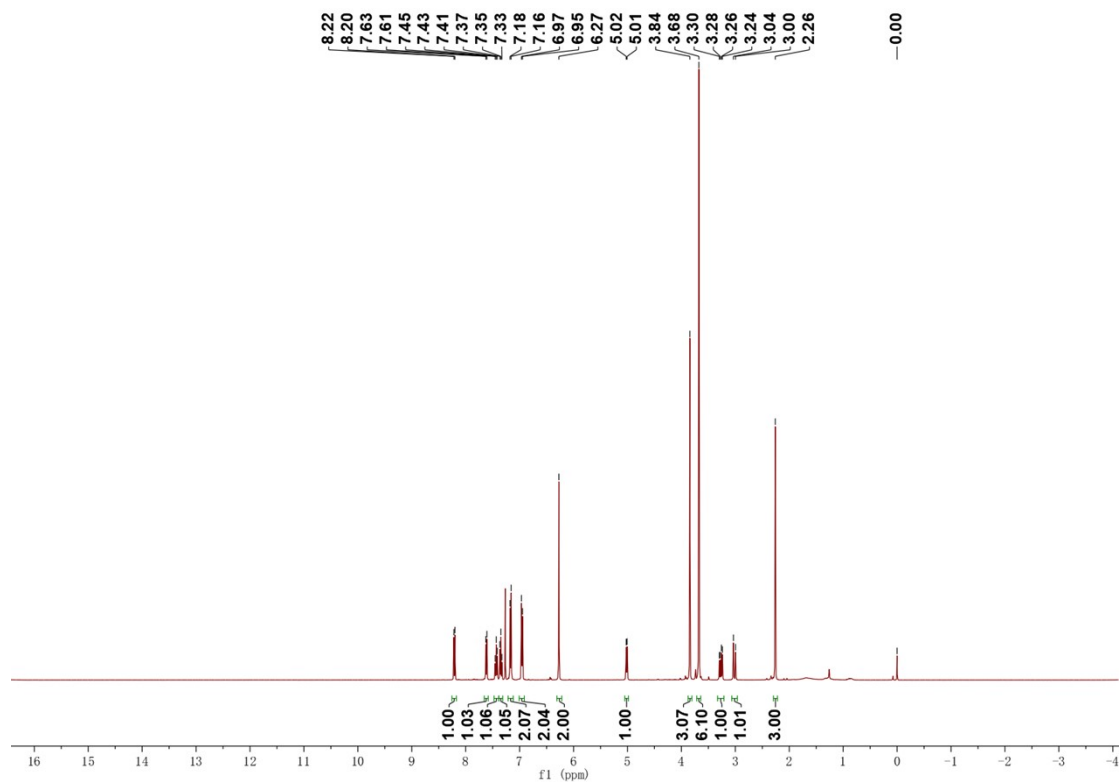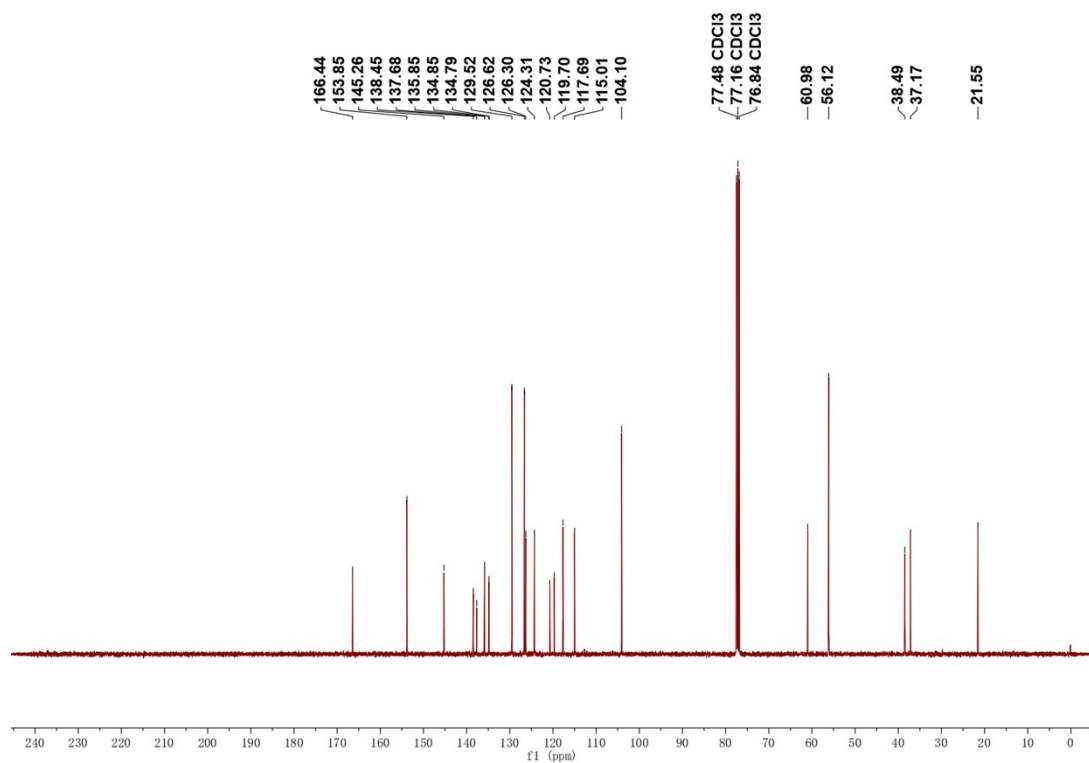

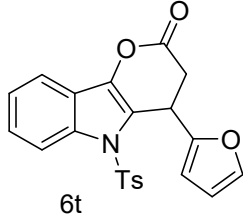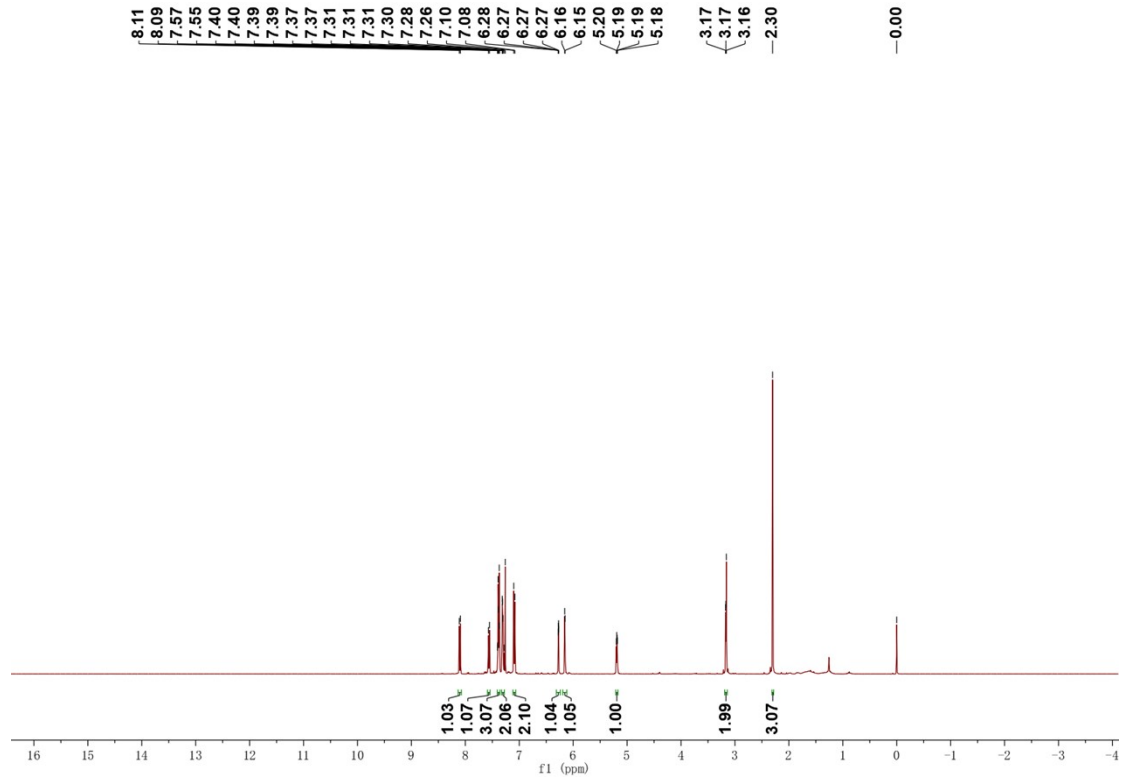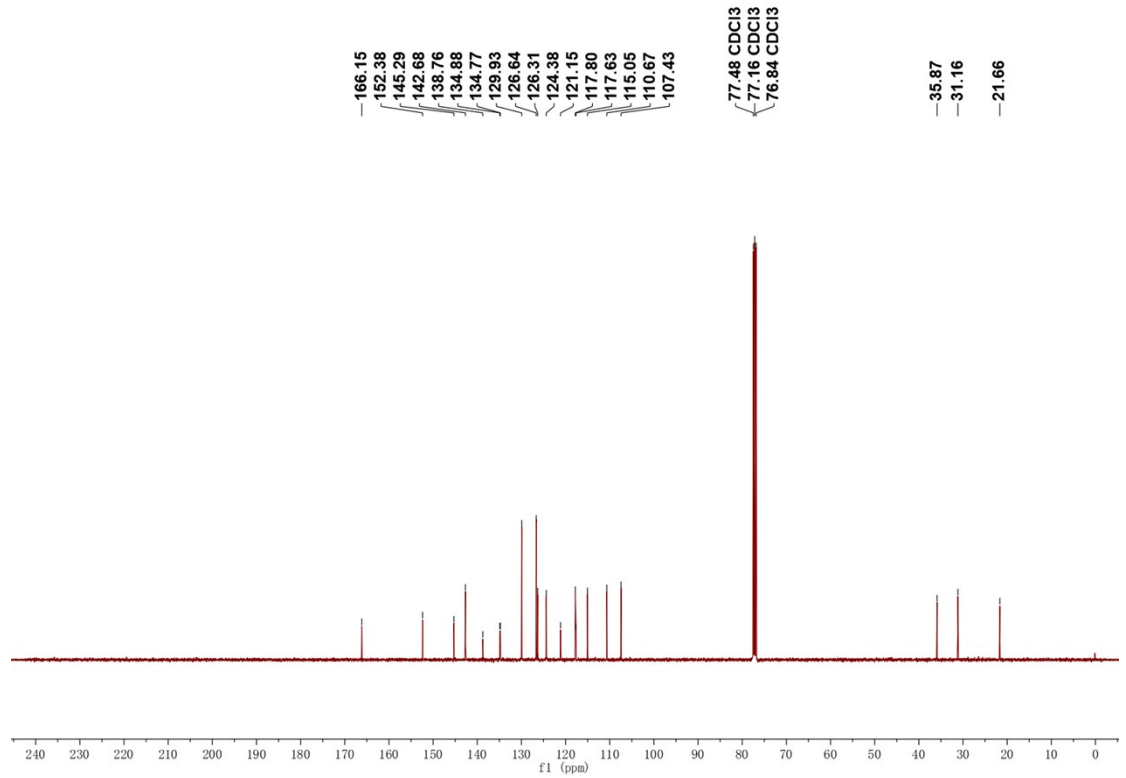

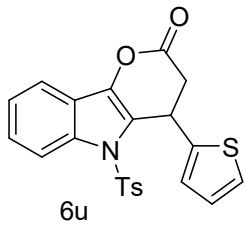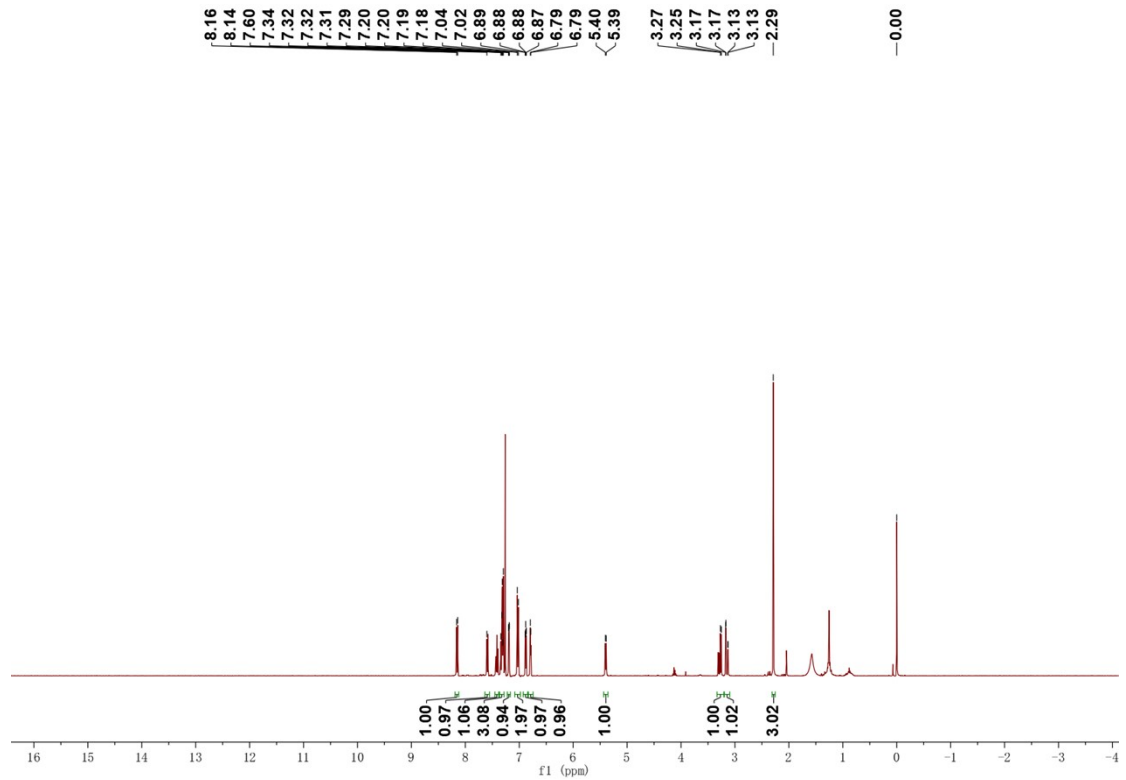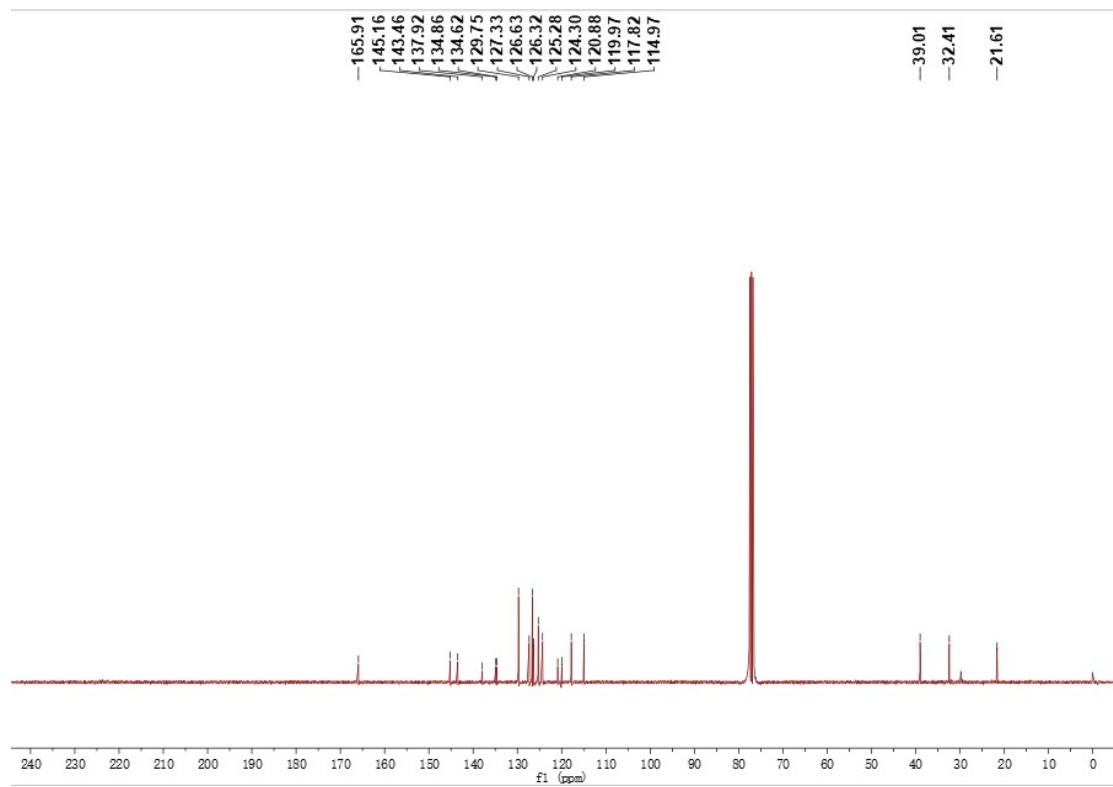



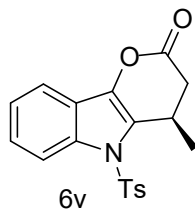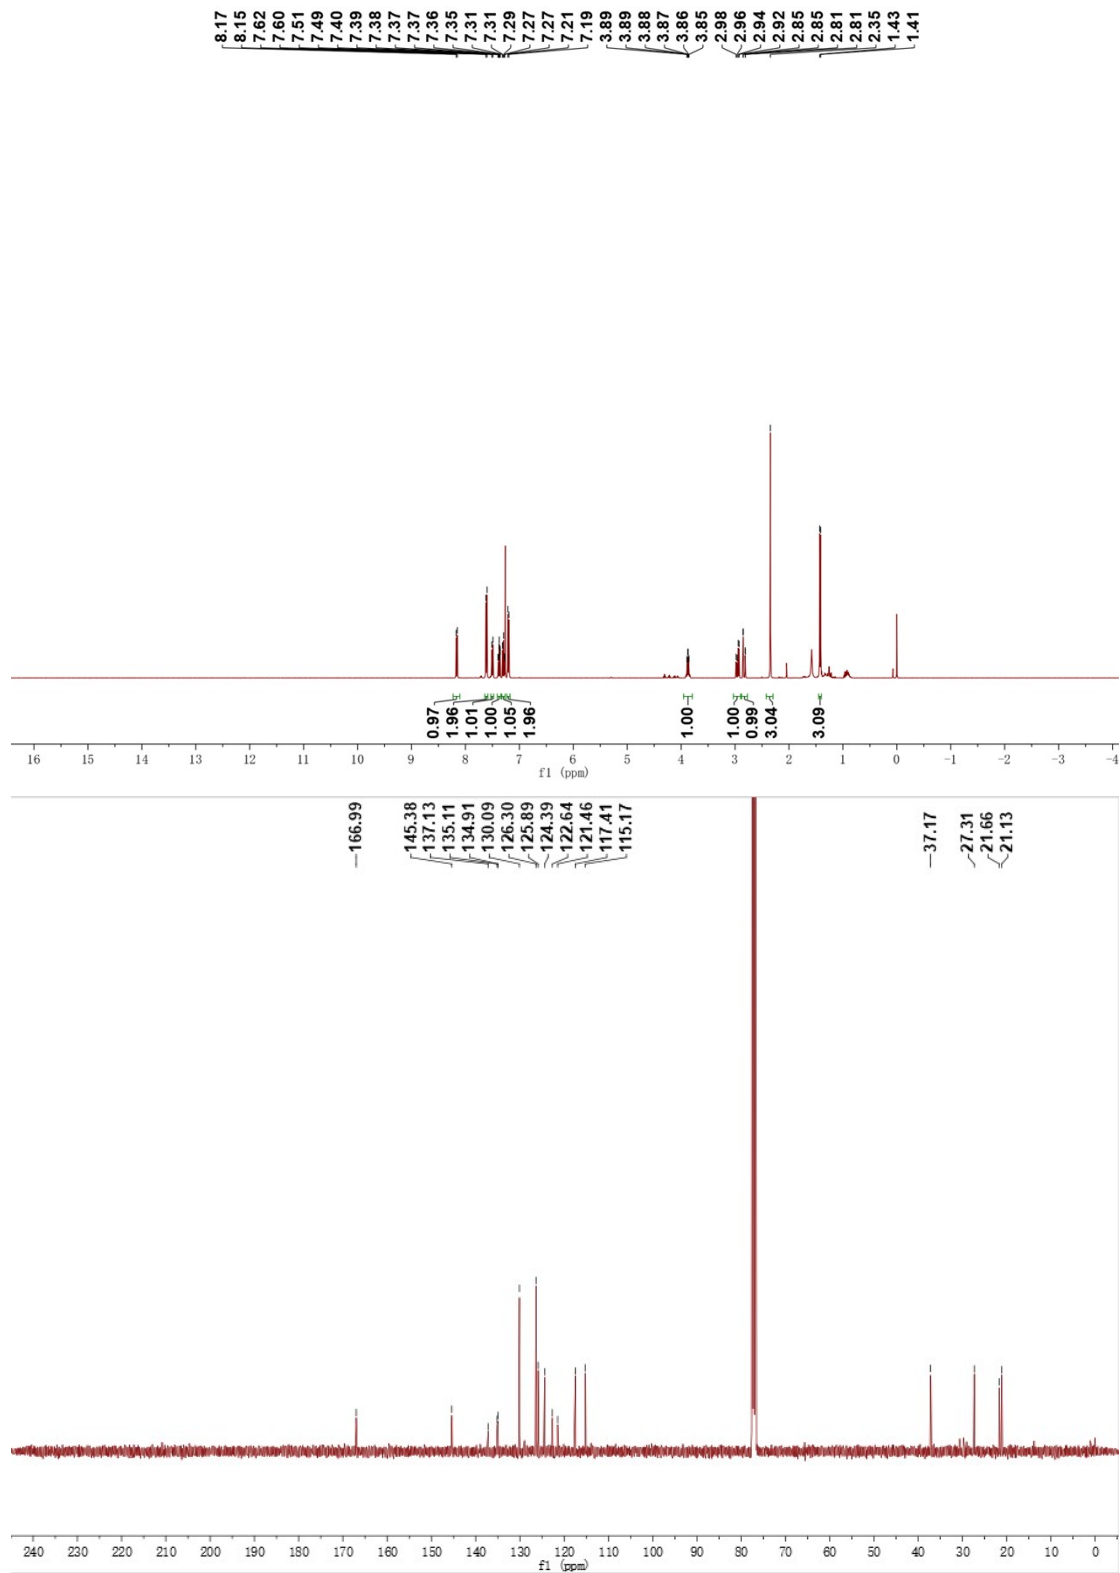

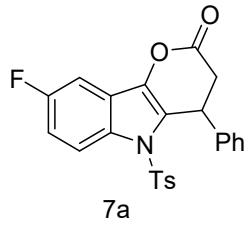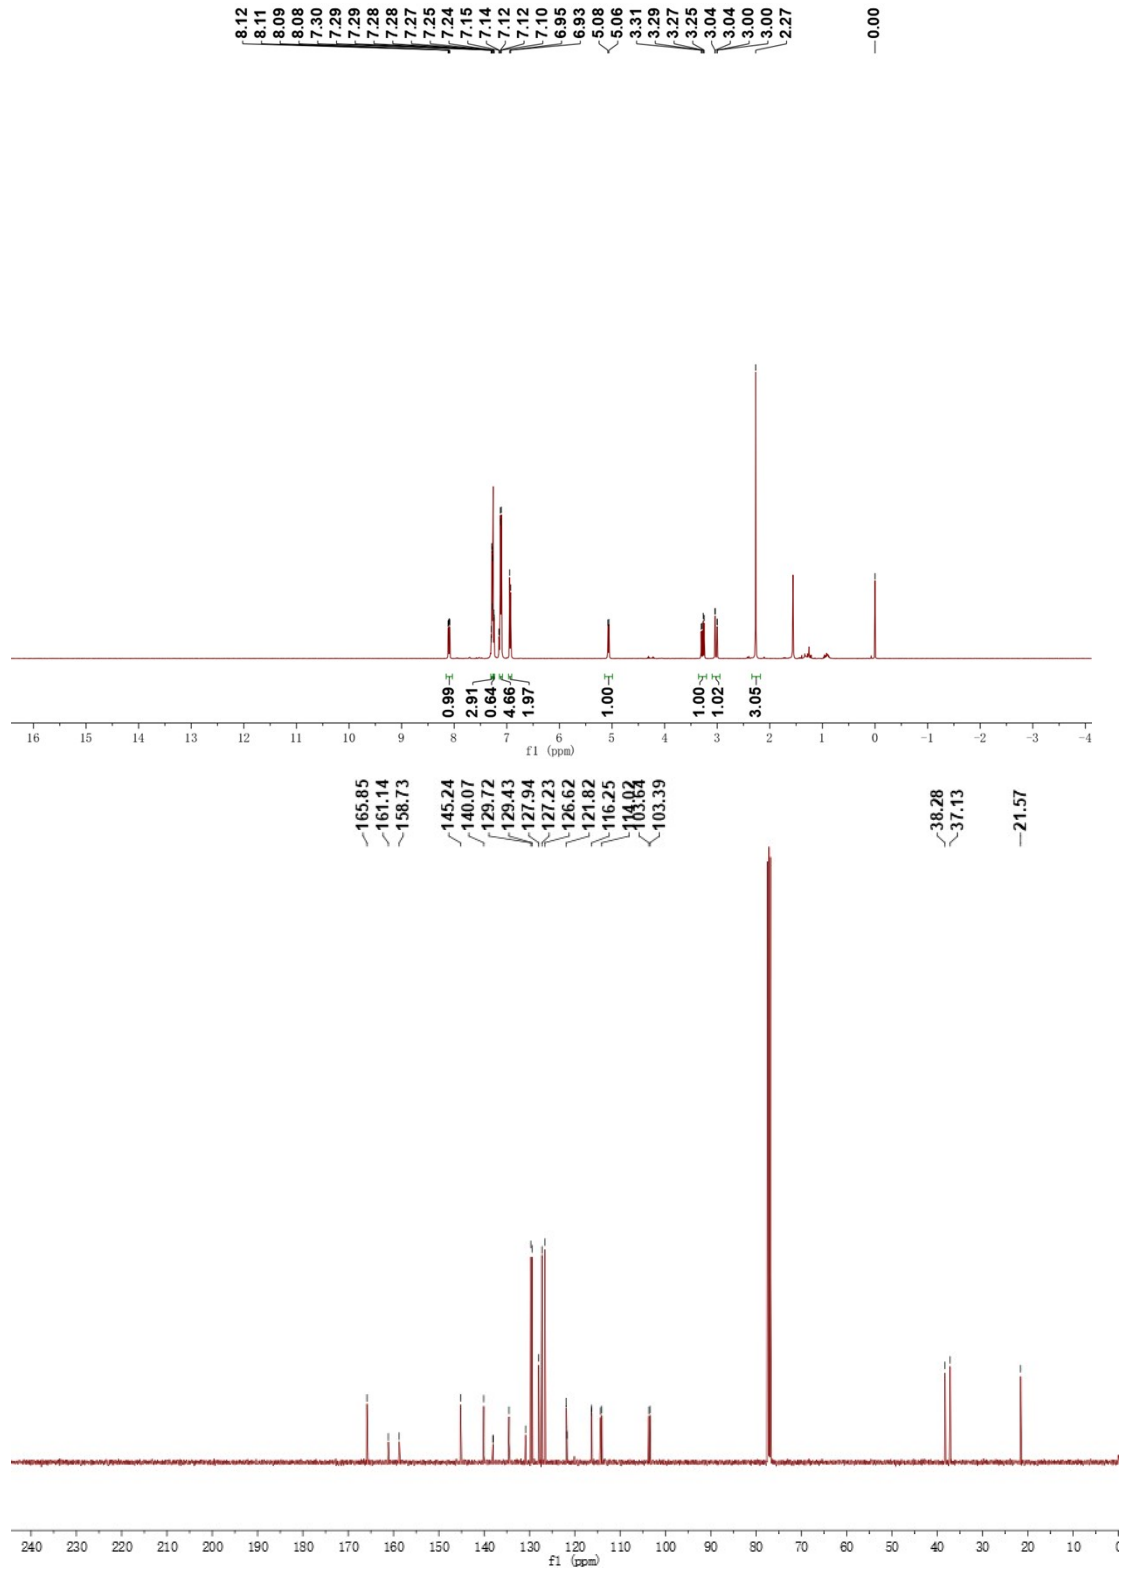

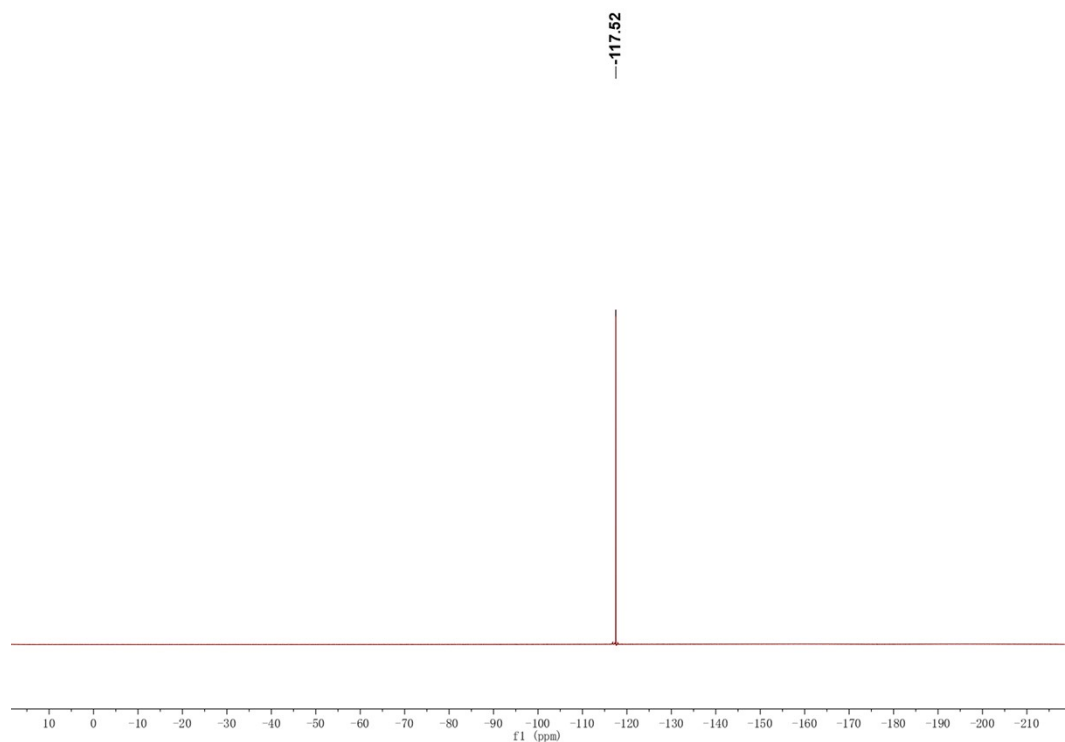

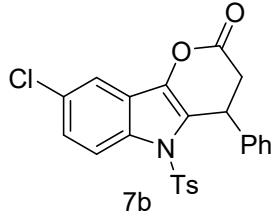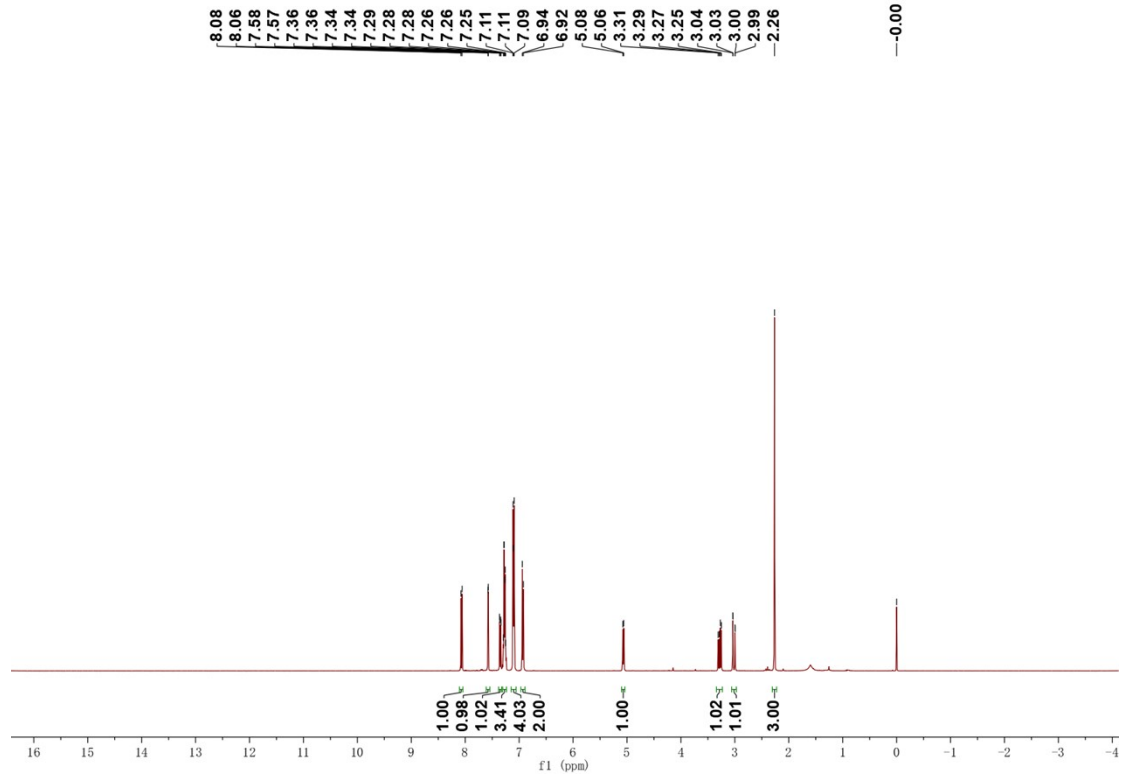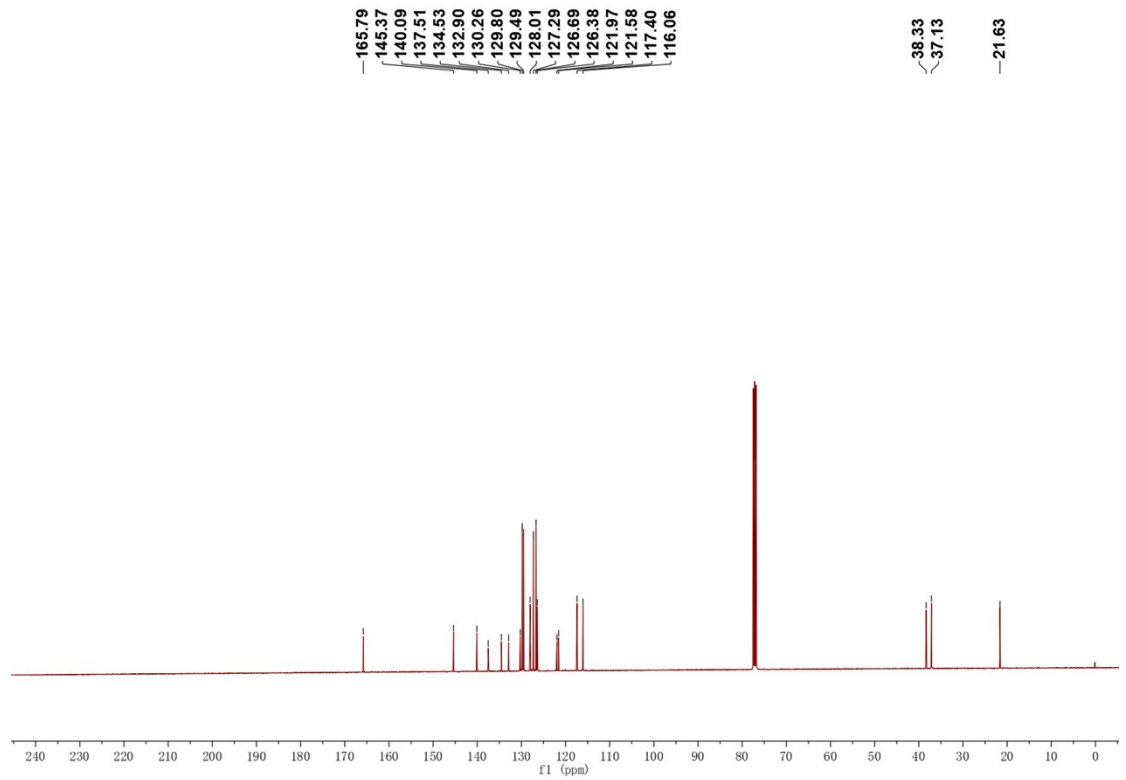

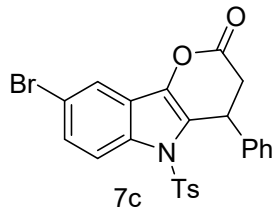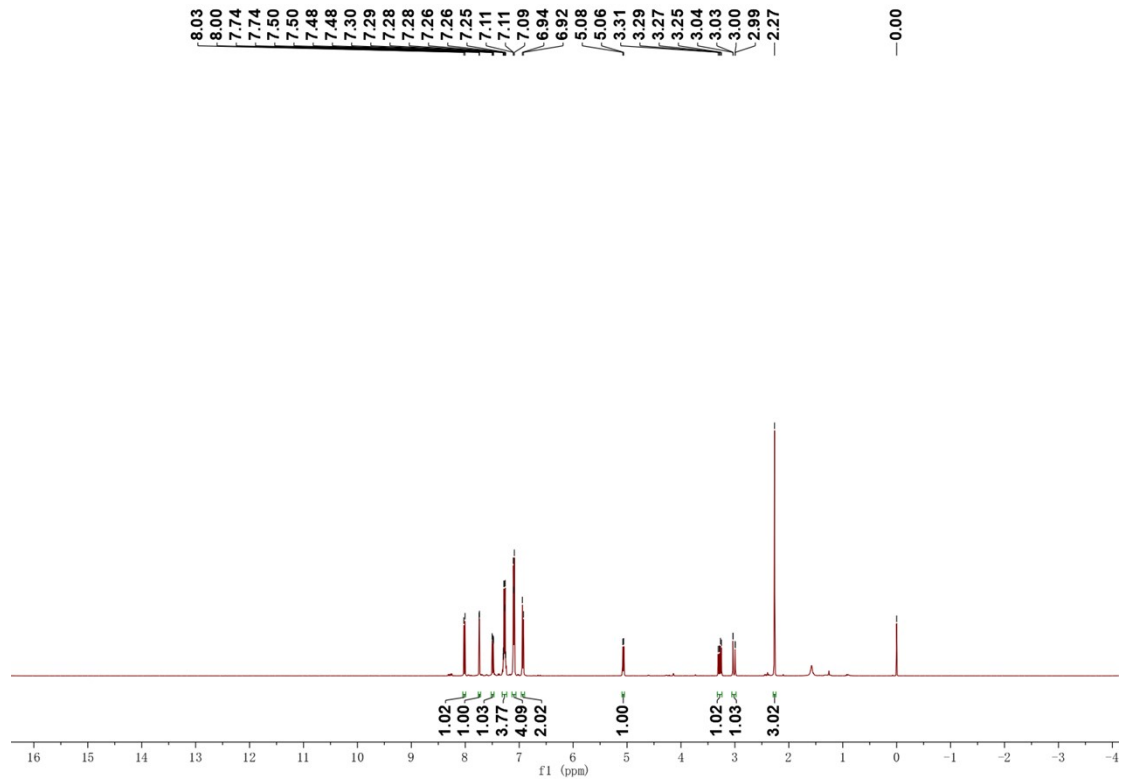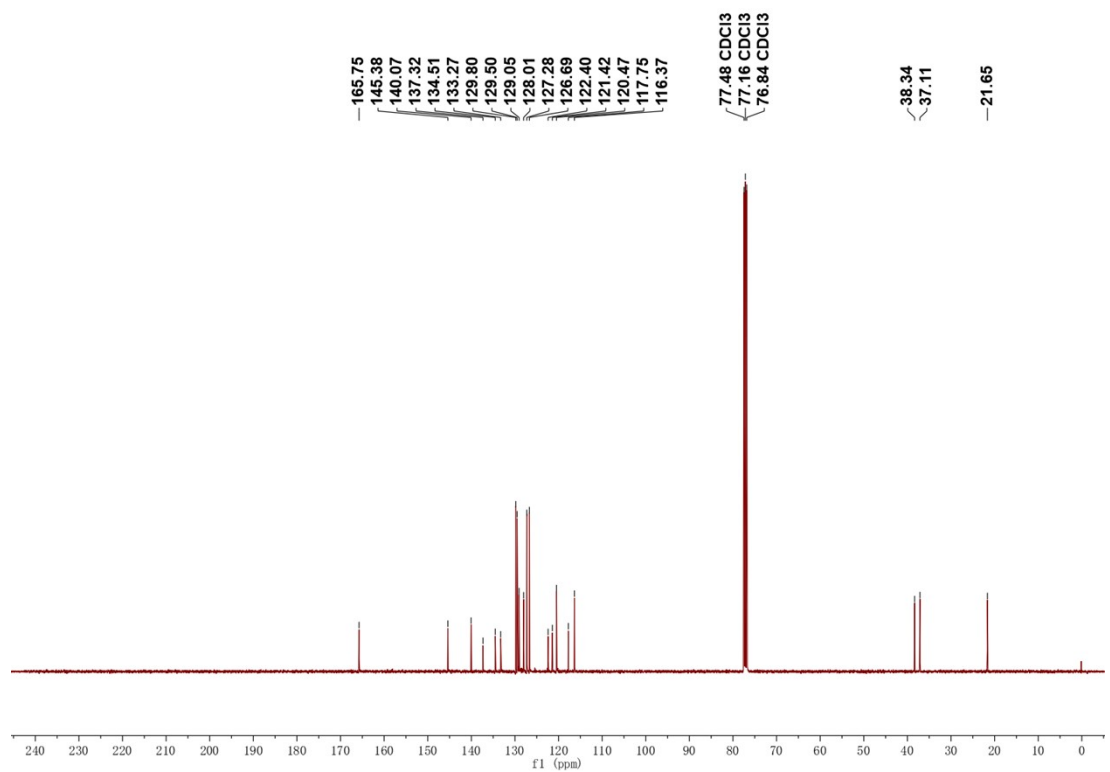

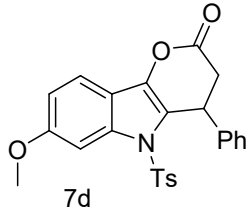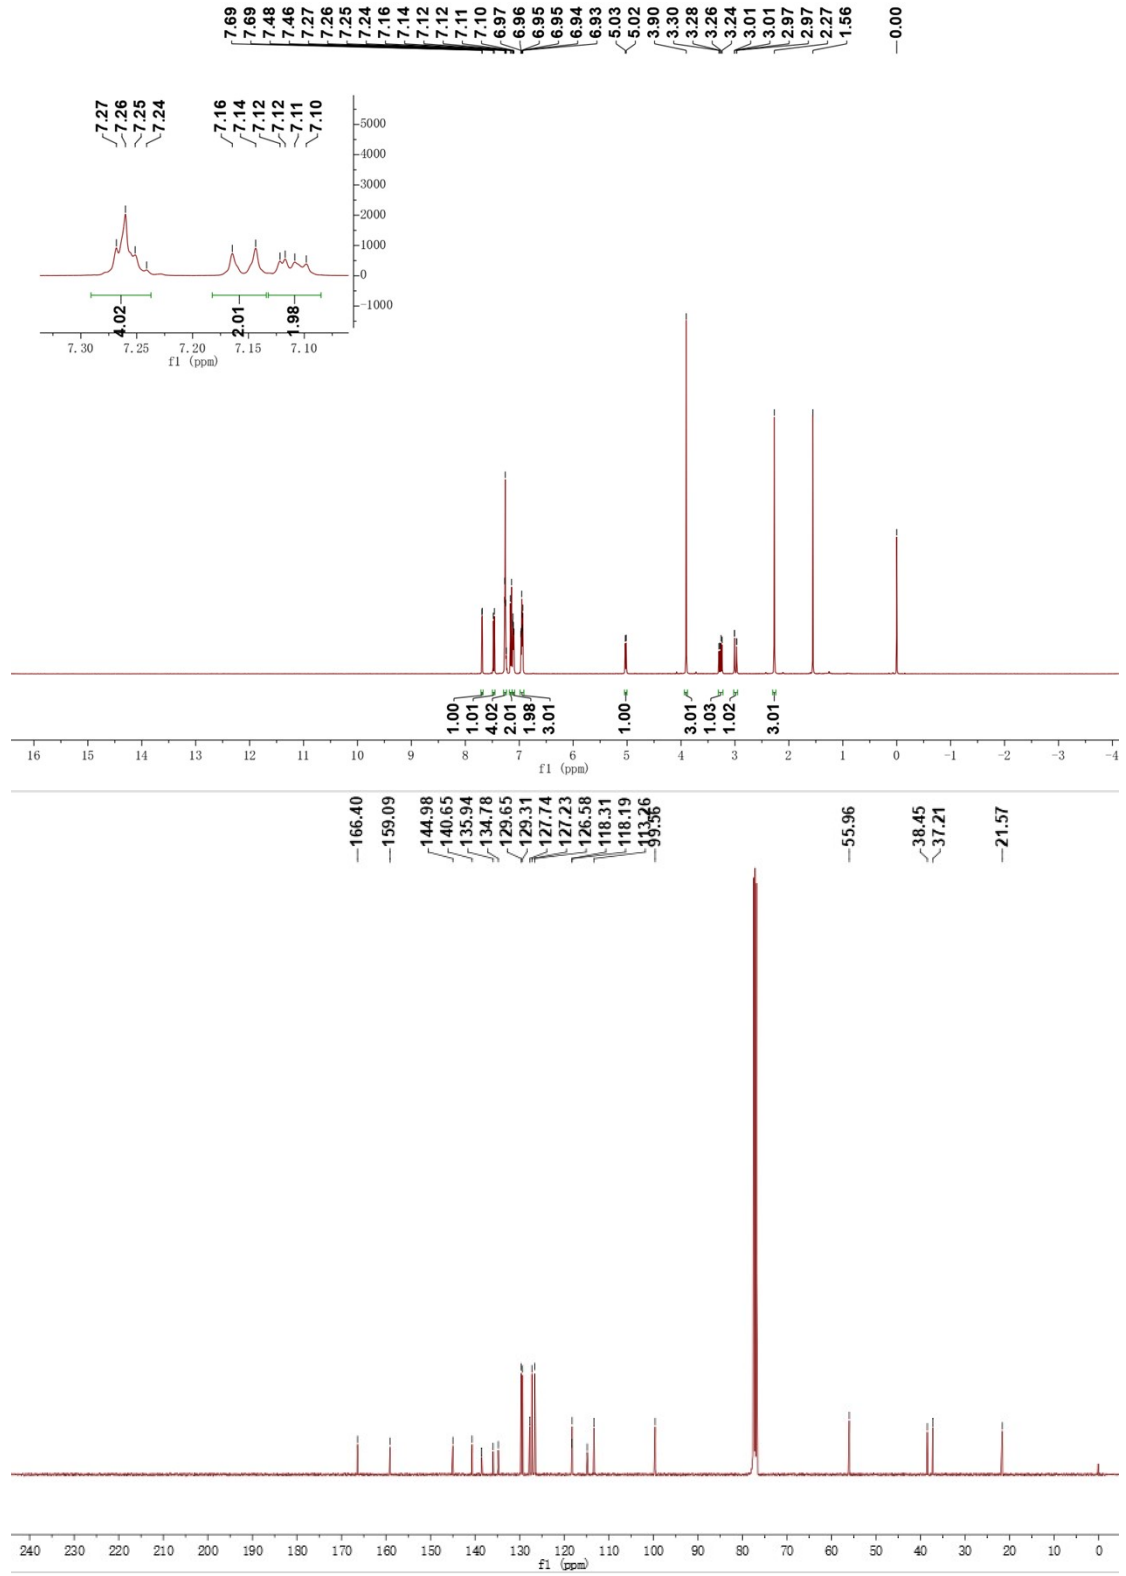

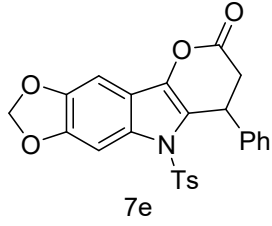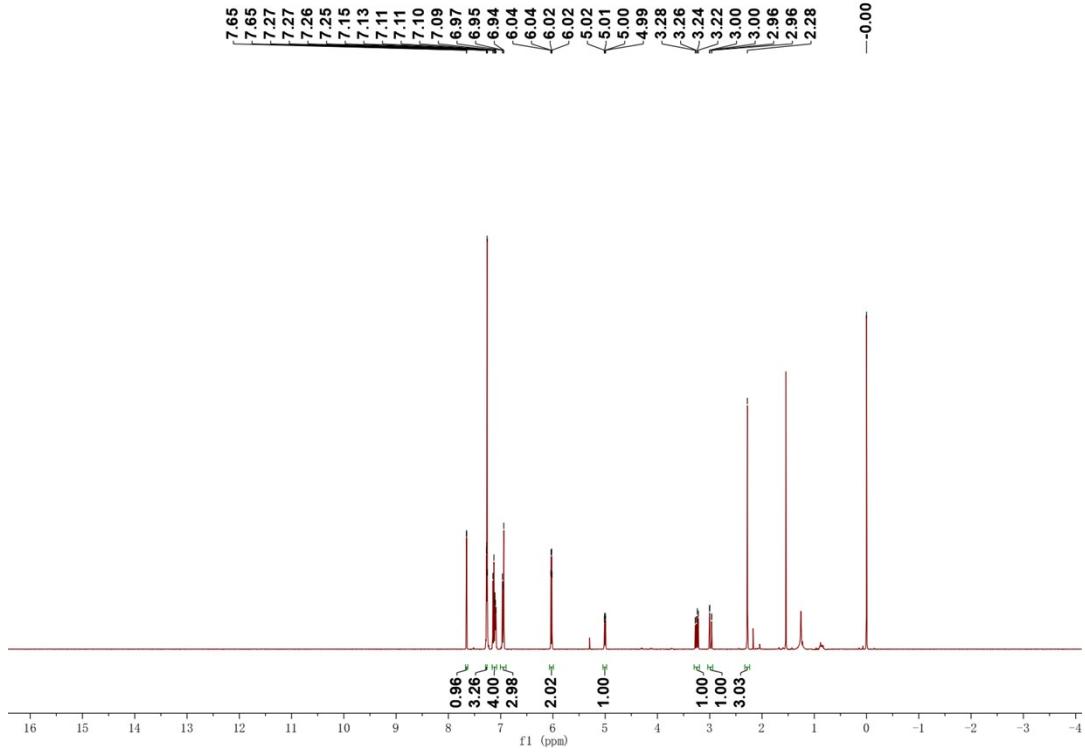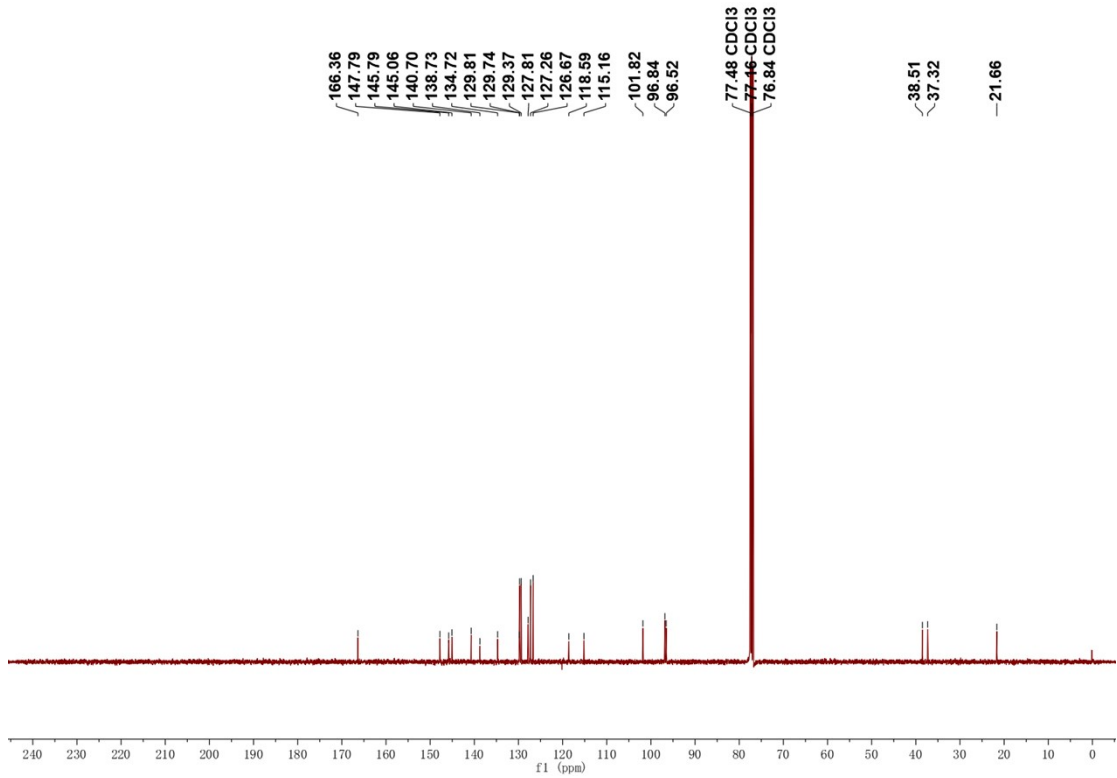

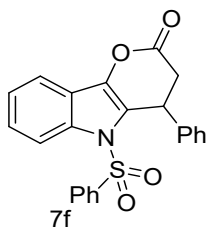

8.18  
8.16  
7.63  
7.63  
7.61  
7.61  
7.42  
7.42  
7.40  
7.40  
7.39  
7.37  
7.36  
7.36  
7.34  
7.34  
7.27  
7.26  
7.26  
7.25  
7.24  
7.24  
7.24  
7.16  
7.14  
7.13  
7.13  
7.12  
7.12  
7.11  
7.11  
5.11  
5.11  
5.10  
5.09  
5.08  
3.33  
3.31  
3.29  
3.27  
3.04  
3.04  
3.00  
3.00

--0.00

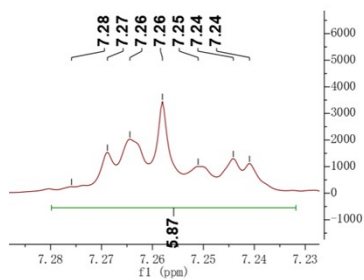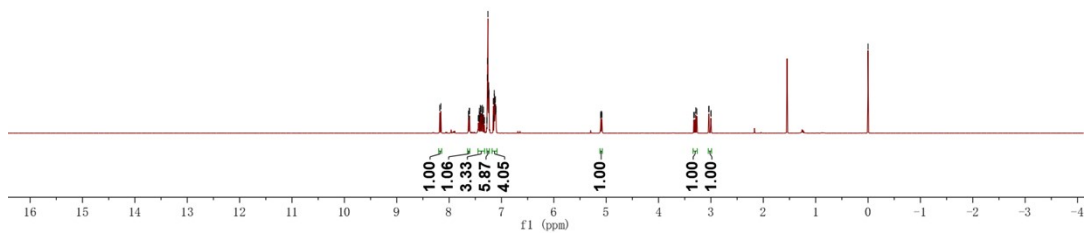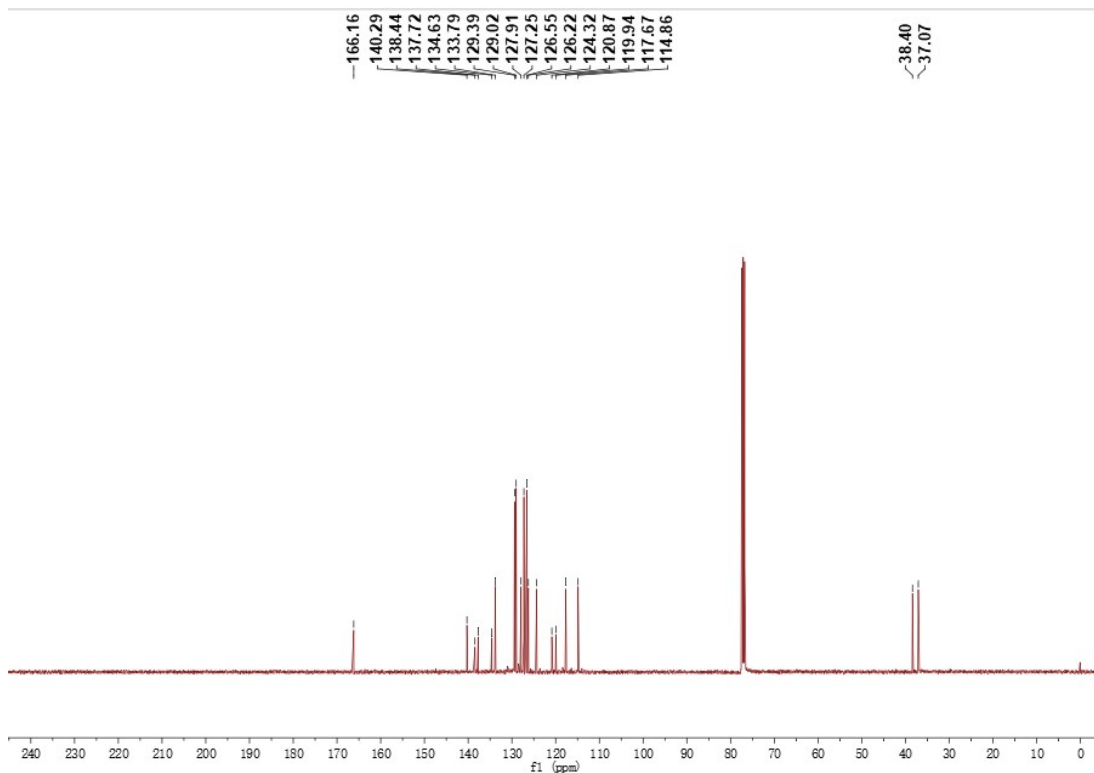



## HPLC spectra of products

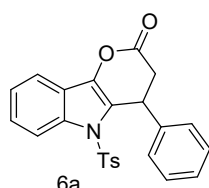

mAU

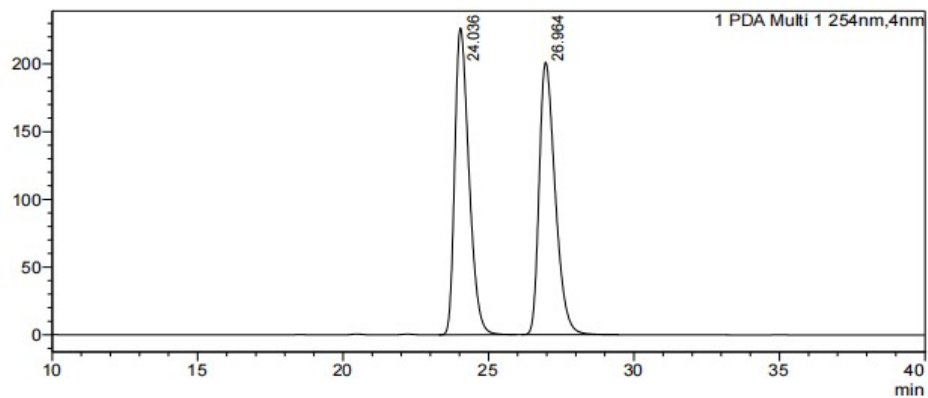

### <Peak Table>

PDA Ch1 254nm

| Peak# | Ret. Time | Area     | Height | Area%   |
|-------|-----------|----------|--------|---------|
| 1     | 24.036    | 7702983  | 226490 | 50.018  |
| 2     | 26.964    | 7697443  | 201091 | 49.982  |
| Total |           | 15400427 | 427581 | 100.000 |

mAU

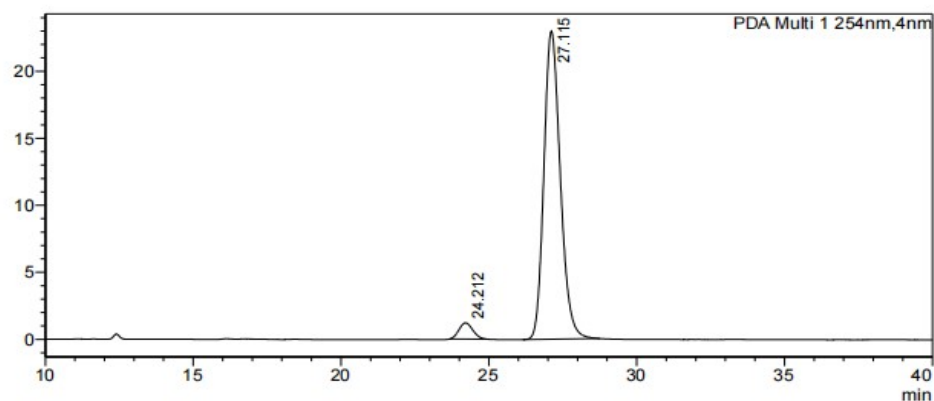

### <Peak Table>

PDA Ch1 254nm

| Peak# | Ret. Time | Area   | Height | Area%   |
|-------|-----------|--------|--------|---------|
| 1     | 24.212    | 39166  | 1204   | 4.235   |
| 2     | 27.115    | 885556 | 22983  | 95.765  |
| Total |           | 924722 | 24187  | 100.000 |

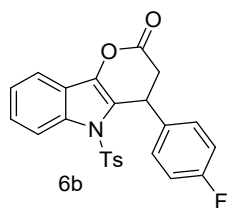

mAU

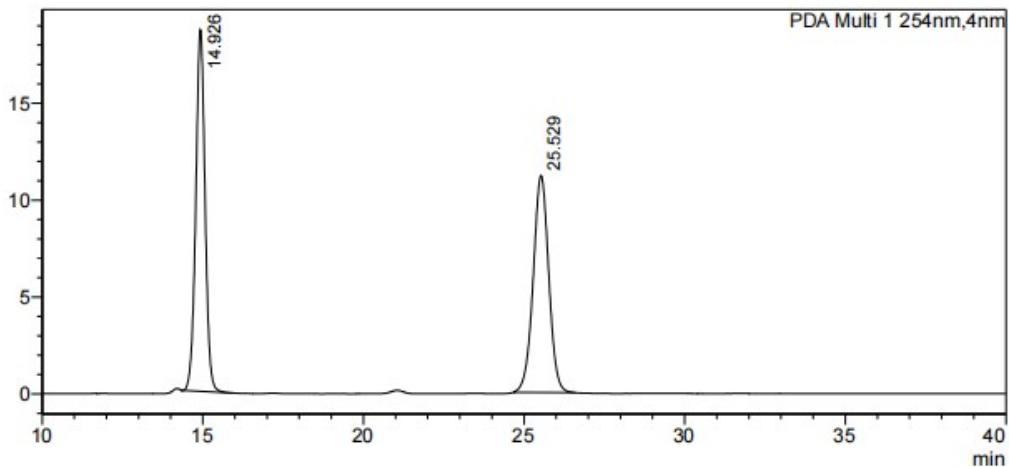

**<Peak Table>**

PDA Ch1 254nm

| Peak# | Ret. Time | Area   | Height | Area%   |
|-------|-----------|--------|--------|---------|
| 1     | 14.926    | 374091 | 18644  | 49.810  |
| 2     | 25.529    | 376942 | 11193  | 50.190  |
| Total |           | 751032 | 29837  | 100.000 |

mAU

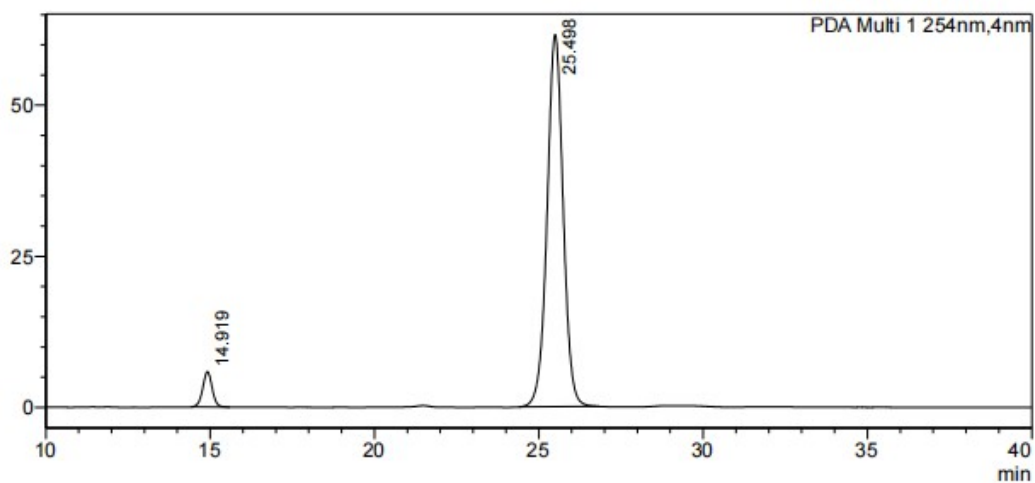

**<Peak Table>**

PDA Ch1 254nm

| Peak# | Ret. Time | Area    | Height | Area%   |
|-------|-----------|---------|--------|---------|
| 1     | 14.919    | 116818  | 5837   | 5.289   |
| 2     | 25.498    | 2091925 | 61545  | 94.711  |
| Total |           | 2208743 | 67382  | 100.000 |

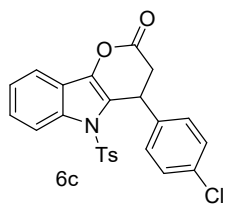

mAU

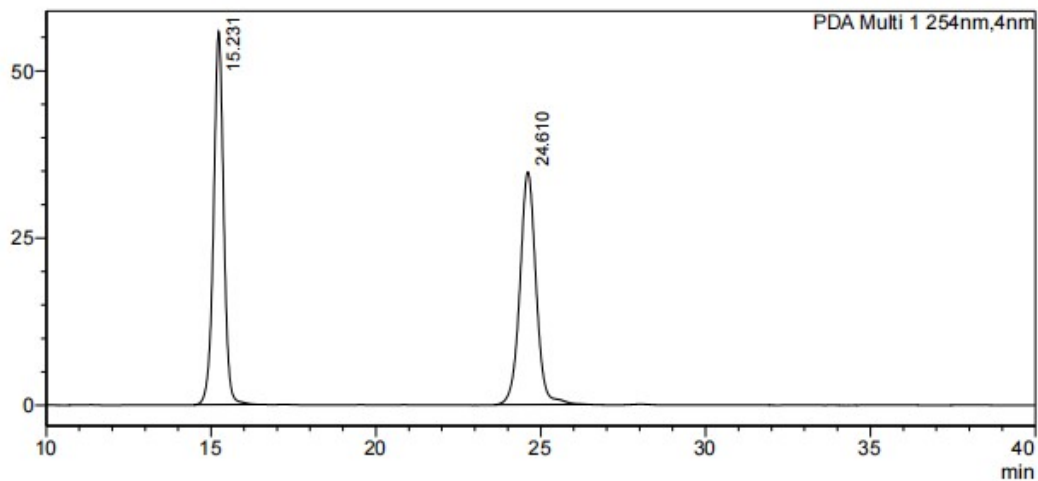

**<Peak Table>**

PDA Ch1 254nm

| Peak# | Ret. Time | Area    | Height | Area%   |
|-------|-----------|---------|--------|---------|
| 1     | 15.231    | 1186980 | 55728  | 50.000  |
| 2     | 24.610    | 1186973 | 34816  | 50.000  |
| Total |           | 2373953 | 90544  | 100.000 |

mAU

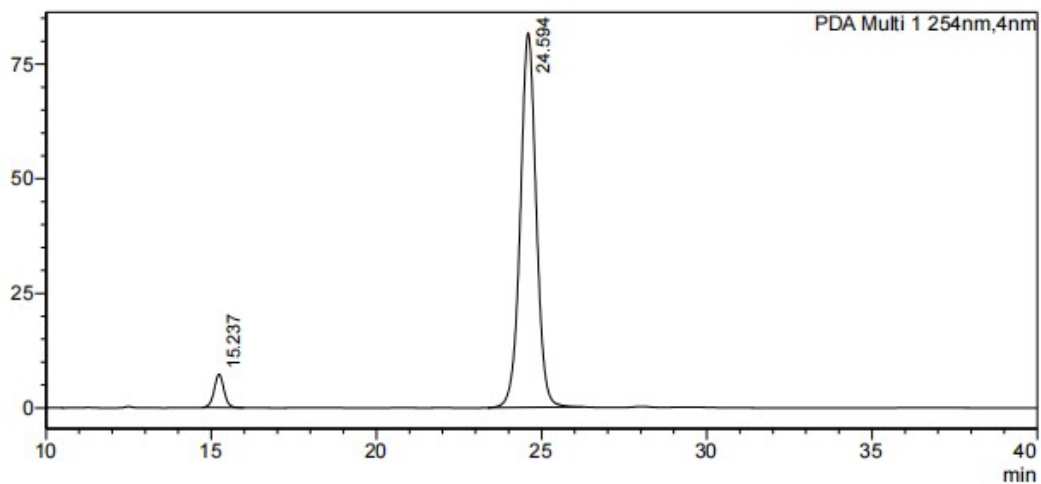

**<Peak Table>**

PDA Ch1 254nm

| Peak# | Ret. Time | Area    | Height | Area%   |
|-------|-----------|---------|--------|---------|
| 1     | 15.237    | 149693  | 7242   | 5.189   |
| 2     | 24.594    | 2735134 | 81648  | 94.811  |
| Total |           | 2884828 | 88890  | 100.000 |

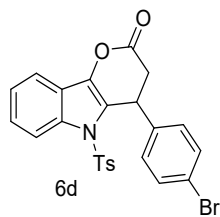

mAU

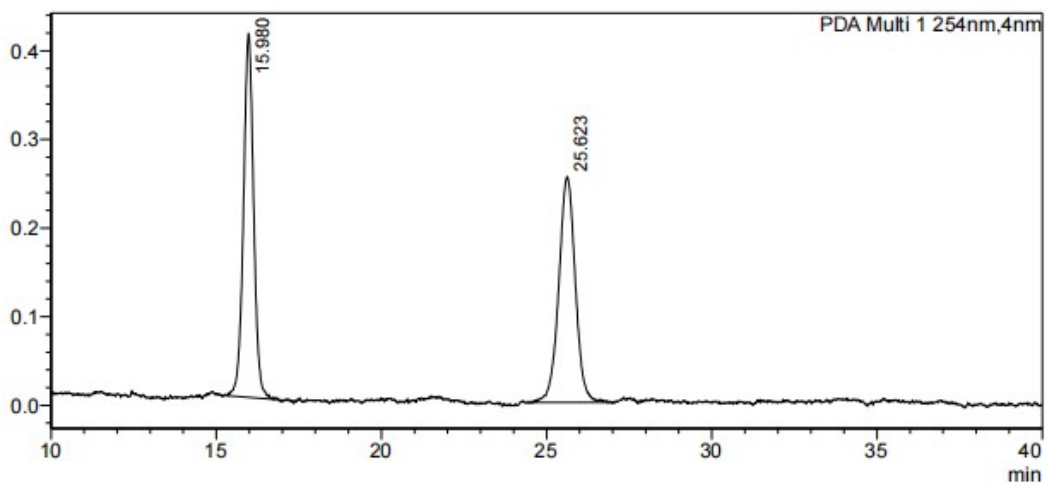

**<Peak Table>**

PDA Ch1 254nm

| Peak# | Ret. Time | Area  | Height | Area%   |
|-------|-----------|-------|--------|---------|
| 1     | 15.980    | 8775  | 410    | 49.734  |
| 2     | 25.623    | 8868  | 255    | 50.266  |
| Total |           | 17643 | 664    | 100.000 |

mAU

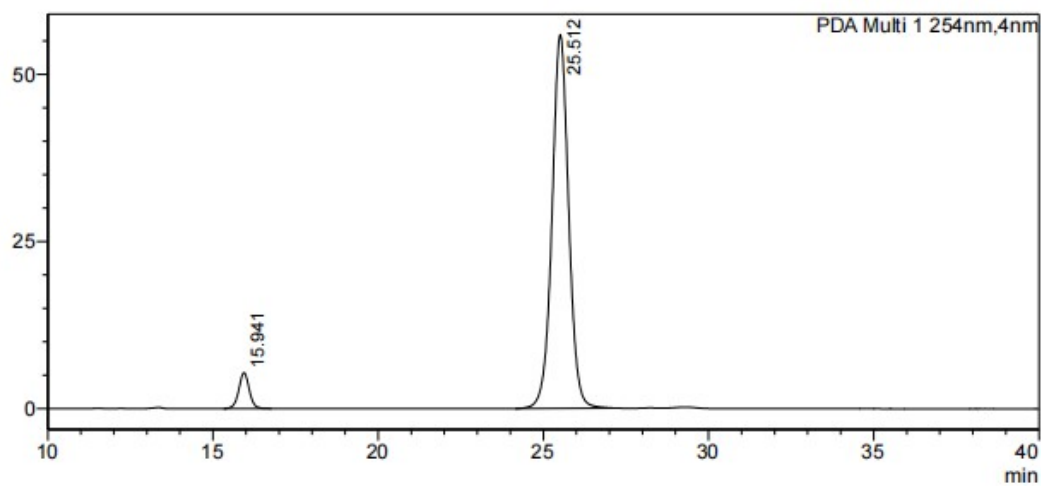

**<Peak Table>**

PDA Ch1 254nm

| Peak# | Ret. Time | Area    | Height | Area%   |
|-------|-----------|---------|--------|---------|
| 1     | 15.941    | 117491  | 5349   | 5.658   |
| 2     | 25.512    | 1958904 | 55831  | 94.342  |
| Total |           | 2076395 | 61180  | 100.000 |

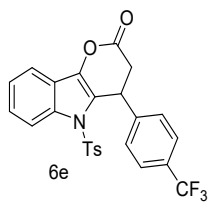

mAU

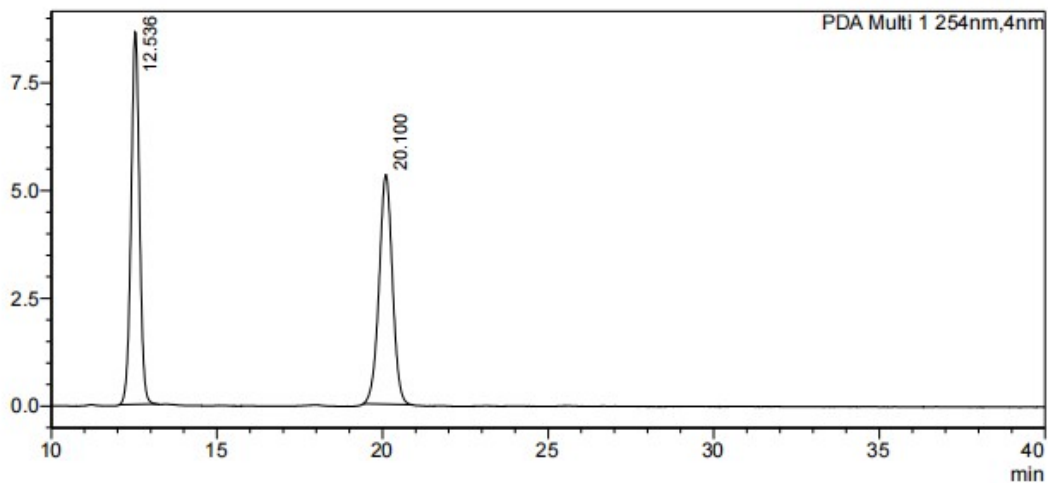

**<Peak Table>**

PDA Ch1 254nm

| Peak# | Ret. Time | Area   | Height | Area%   |
|-------|-----------|--------|--------|---------|
| 1     | 12.536    | 152227 | 8639   | 50.425  |
| 2     | 20.100    | 149664 | 5325   | 49.575  |
| Total |           | 301891 | 13964  | 100.000 |

mAU

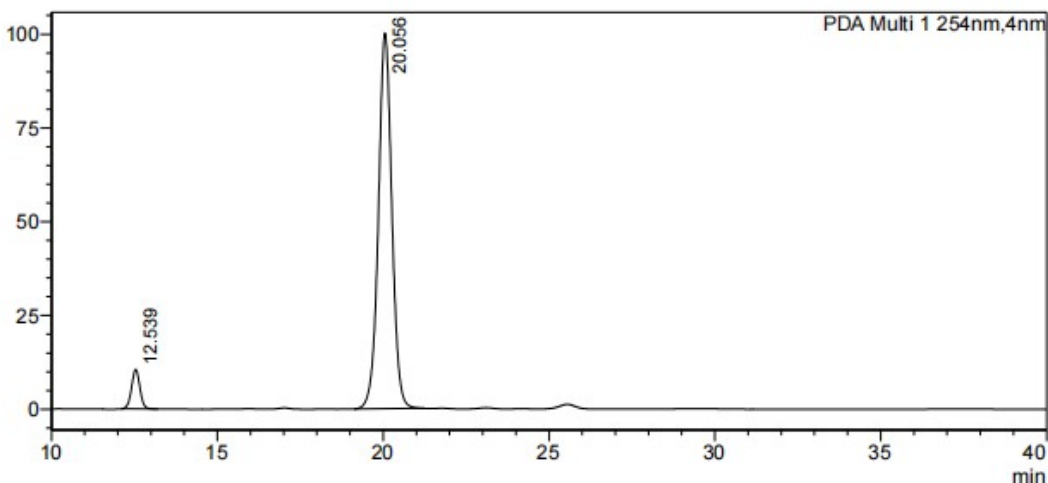

**<Peak Table>**

PDA Ch1 254nm

| Peak# | Ret. Time | Area    | Height | Area%   |
|-------|-----------|---------|--------|---------|
| 1     | 12.539    | 183356  | 10486  | 6.083   |
| 2     | 20.056    | 2830870 | 100091 | 93.917  |
| Total |           | 3014226 | 110577 | 100.000 |

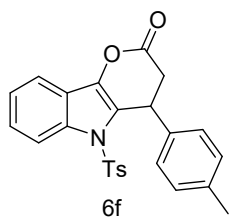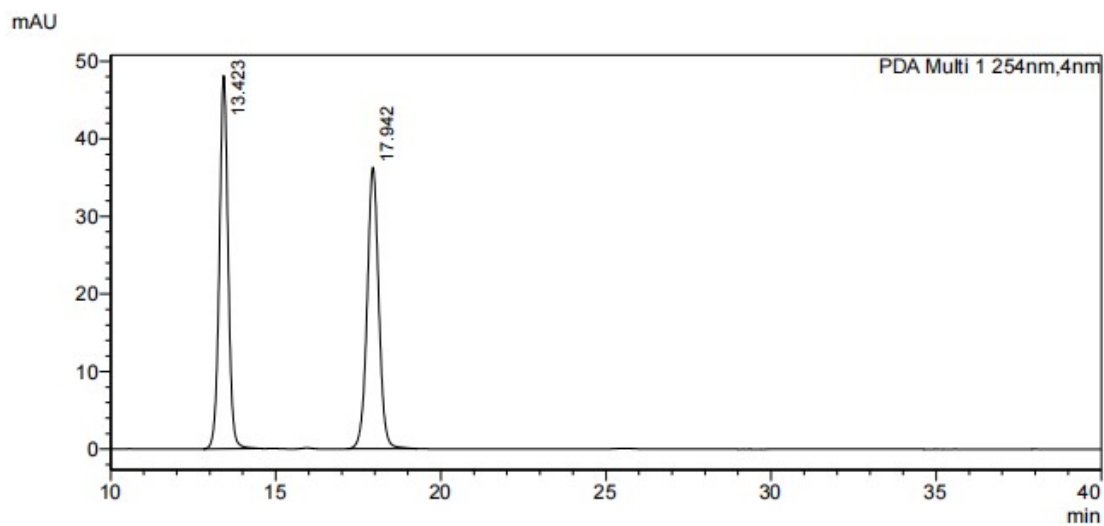

**<Peak Table>**

PDA Ch1 254nm

| Peak# | Ret. Time | Area    | Height | Area%   |
|-------|-----------|---------|--------|---------|
| 1     | 13.423    | 888098  | 48068  | 50.001  |
| 2     | 17.942    | 888057  | 36261  | 49.999  |
| Total |           | 1776155 | 84330  | 100.000 |

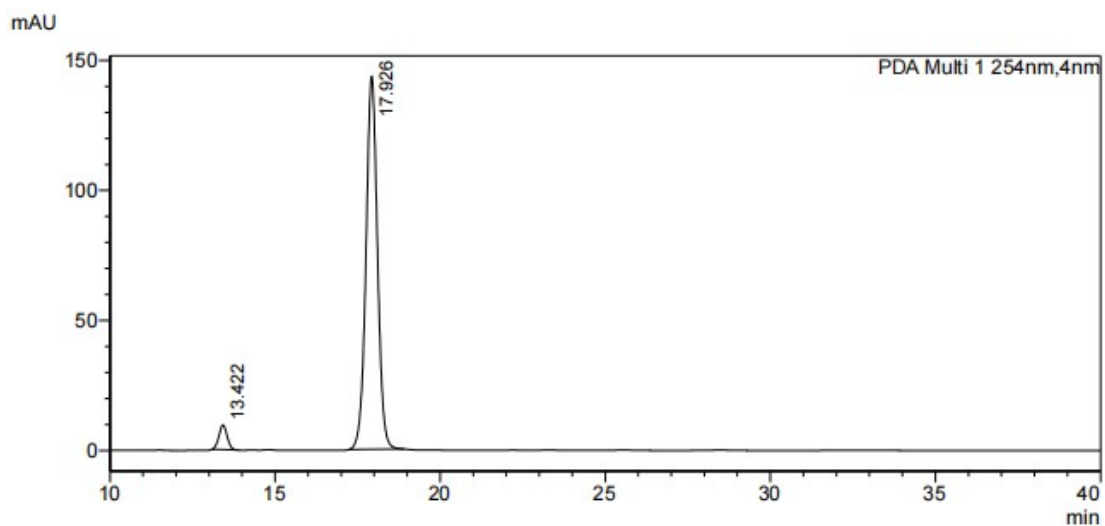

**<Peak Table>**

PDA Ch1 254nm

| Peak# | Ret. Time | Area    | Height | Area%   |
|-------|-----------|---------|--------|---------|
| 1     | 13.422    | 163499  | 9444   | 4.514   |
| 2     | 17.926    | 3458197 | 143217 | 95.486  |
| Total |           | 3621696 | 152661 | 100.000 |

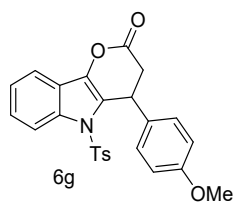

mAU

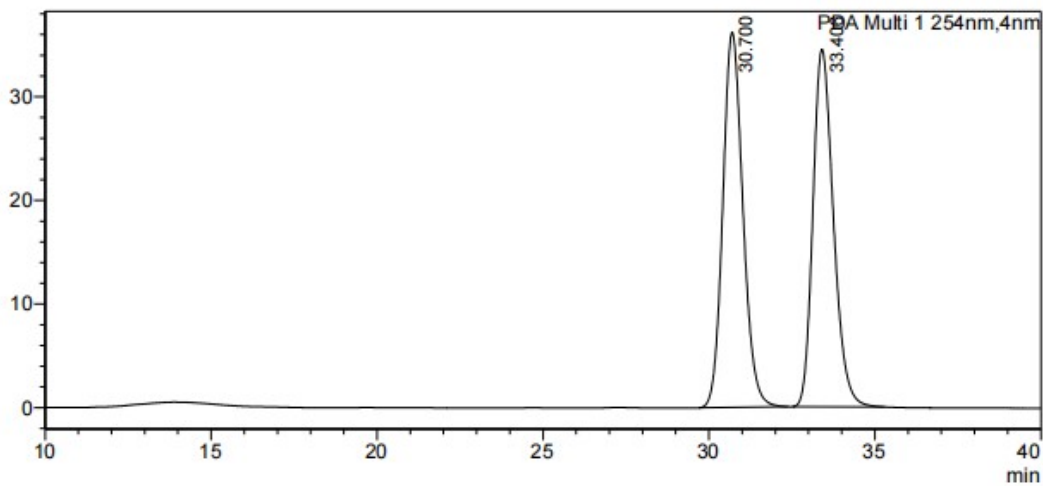

**<Peak Table>**

PDA Ch1 254nm

| Peak# | Ret. Time | Area    | Height | Area%   |
|-------|-----------|---------|--------|---------|
| 1     | 30.700    | 1522367 | 36190  | 50.711  |
| 2     | 33.406    | 1479671 | 34491  | 49.289  |
| Total |           | 3002037 | 70682  | 100.000 |

mAU

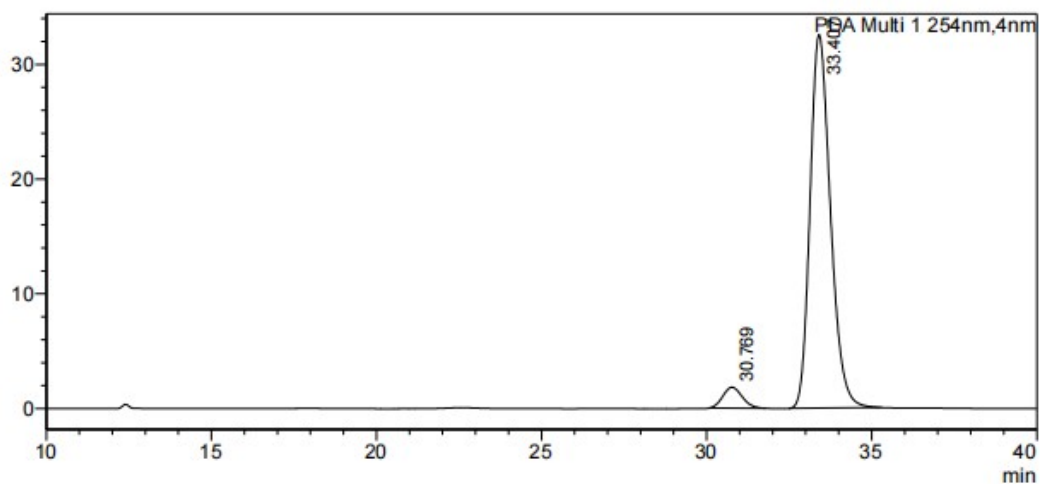

**<Peak Table>**

PDA Ch1 254nm

| Peak# | Ret. Time | Area    | Height | Area%   |
|-------|-----------|---------|--------|---------|
| 1     | 30.769    | 73763   | 1813   | 5.012   |
| 2     | 33.407    | 1398068 | 32546  | 94.988  |
| Total |           | 1471832 | 34359  | 100.000 |

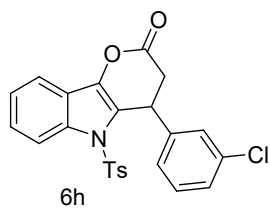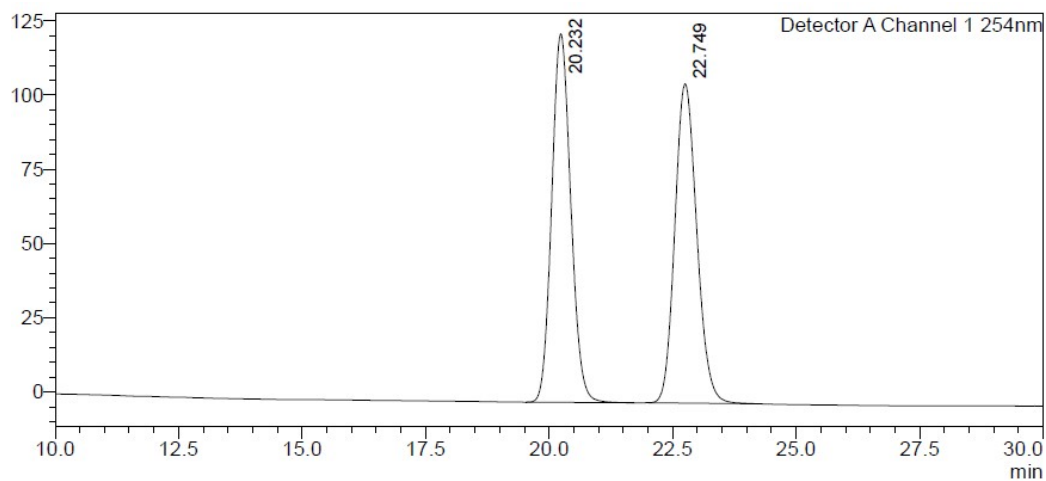

| Peak# | Ret. Time | Area    | Height | Area%   |
|-------|-----------|---------|--------|---------|
| 1     | 20.232    | 3338051 | 124113 | 50.083  |
| 2     | 22.749    | 3326948 | 107600 | 49.917  |
| Total |           | 6664998 | 231713 | 100.000 |

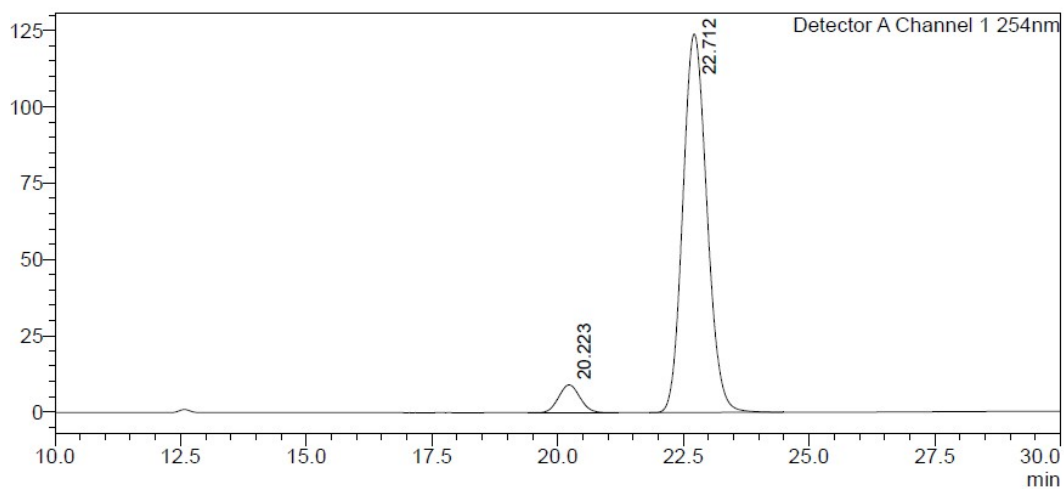

| Peak# | Ret. Time | Area    | Height | Area%   |
|-------|-----------|---------|--------|---------|
| 1     | 20.223    | 271239  | 9117   | 6.161   |
| 2     | 22.712    | 4131455 | 124025 | 93.839  |
| Total |           | 4402694 | 133143 | 100.000 |



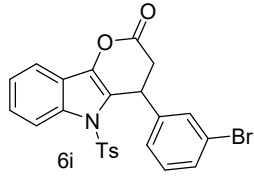

mAU

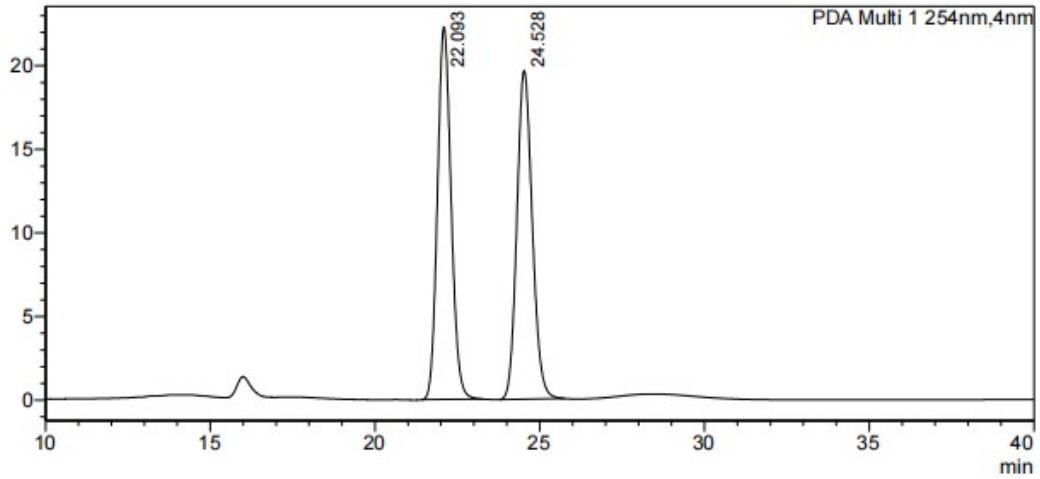

**<Peak Table>**

PDA Ch1 254nm

| Peak# | Ret. Time | Area    | Height | Area%   |
|-------|-----------|---------|--------|---------|
| 1     | 22.093    | 642001  | 22266  | 50.160  |
| 2     | 24.528    | 637900  | 19644  | 49.840  |
| Total |           | 1279901 | 41910  | 100.000 |

mAU

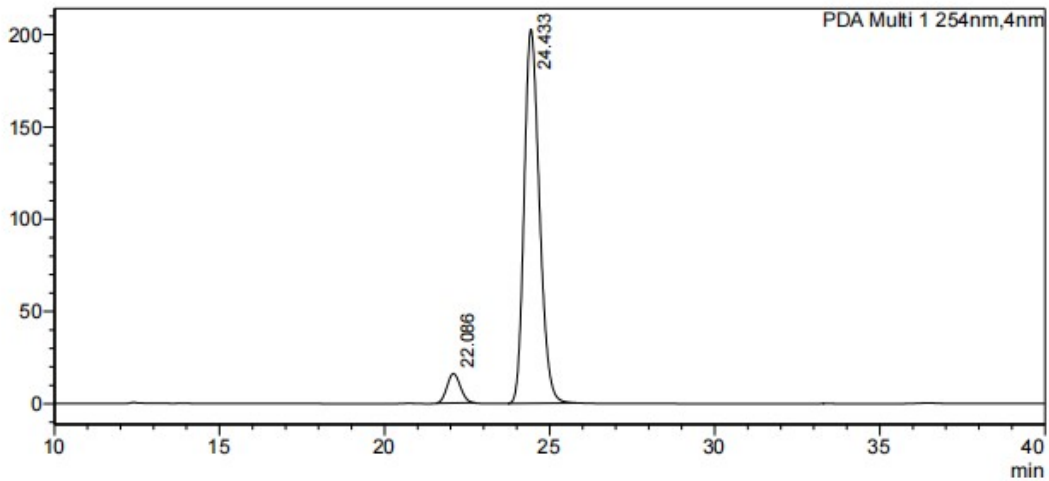

**<Peak Table>**

PDA Ch1 254nm

| Peak# | Ret. Time | Area    | Height | Area%   |
|-------|-----------|---------|--------|---------|
| 1     | 22.086    | 446468  | 15943  | 6.417   |
| 2     | 24.433    | 6511311 | 202521 | 93.583  |
| Total |           | 6957779 | 218464 | 100.000 |

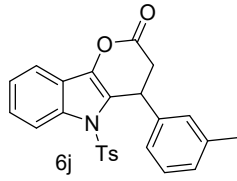

mAU

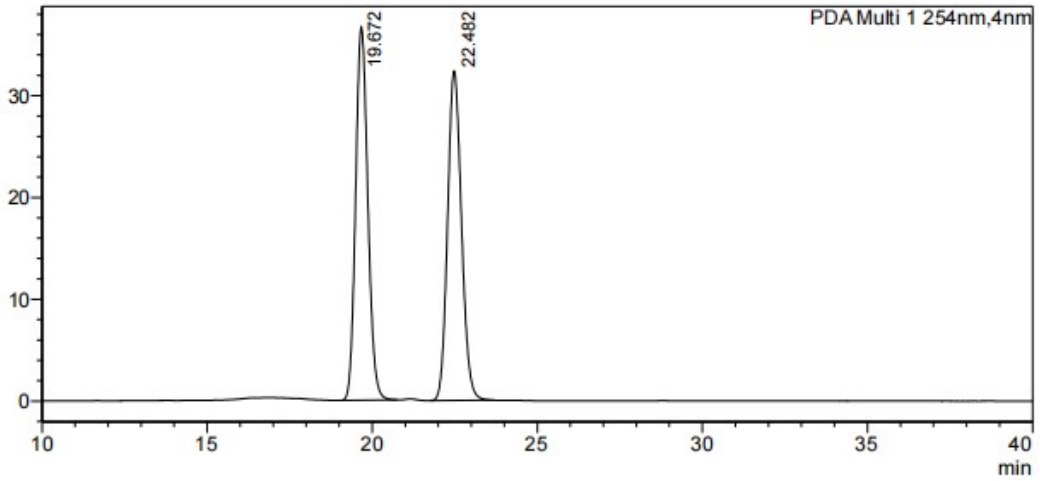

<Peak Table>

PDA Ch1 254nm

| Peak# | Ret. Time | Area    | Height | Area%   |
|-------|-----------|---------|--------|---------|
| 1     | 19.672    | 941312  | 36634  | 49.853  |
| 2     | 22.482    | 946847  | 32366  | 50.147  |
| Total |           | 1888159 | 69000  | 100.000 |

mAU

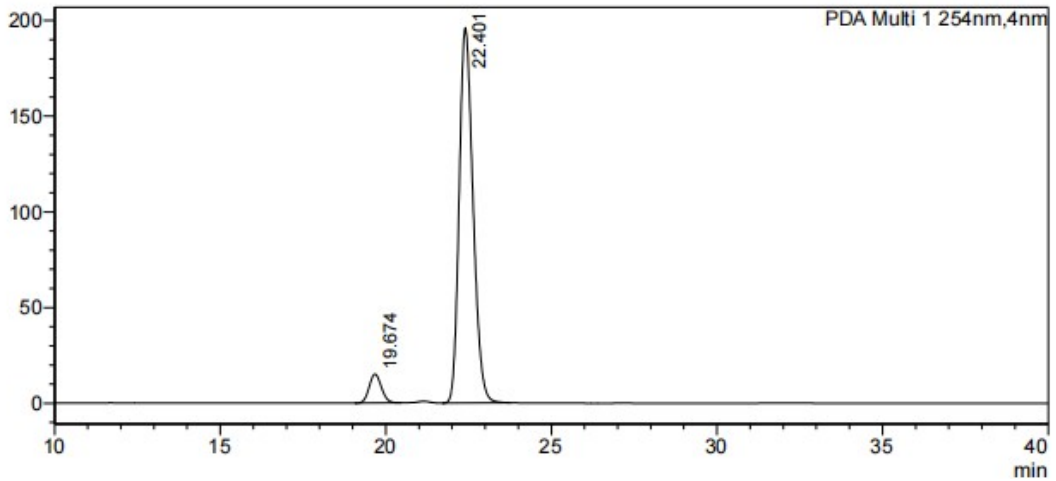

<Peak Table>

PDA Ch1 254nm

| Peak# | Ret. Time | Area    | Height | Area%   |
|-------|-----------|---------|--------|---------|
| 1     | 19.674    | 389218  | 15119  | 6.394   |
| 2     | 22.401    | 5697965 | 195819 | 93.606  |
| Total |           | 6087182 | 210938 | 100.000 |

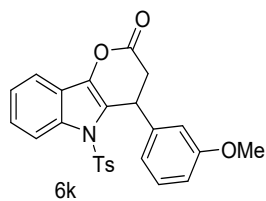

mAU

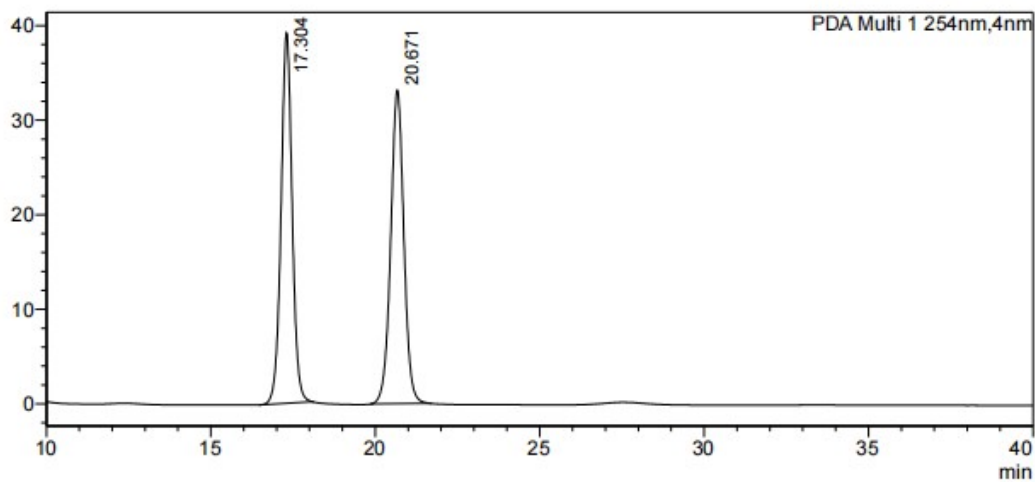

<Peak Table>

PDA Ch1 254nm

| Peak# | Ret. Time | Area    | Height | Area%   |
|-------|-----------|---------|--------|---------|
| 1     | 17.304    | 920783  | 39147  | 49.958  |
| 2     | 20.671    | 922334  | 33138  | 50.042  |
| Total |           | 1843117 | 72286  | 100.000 |

mAU

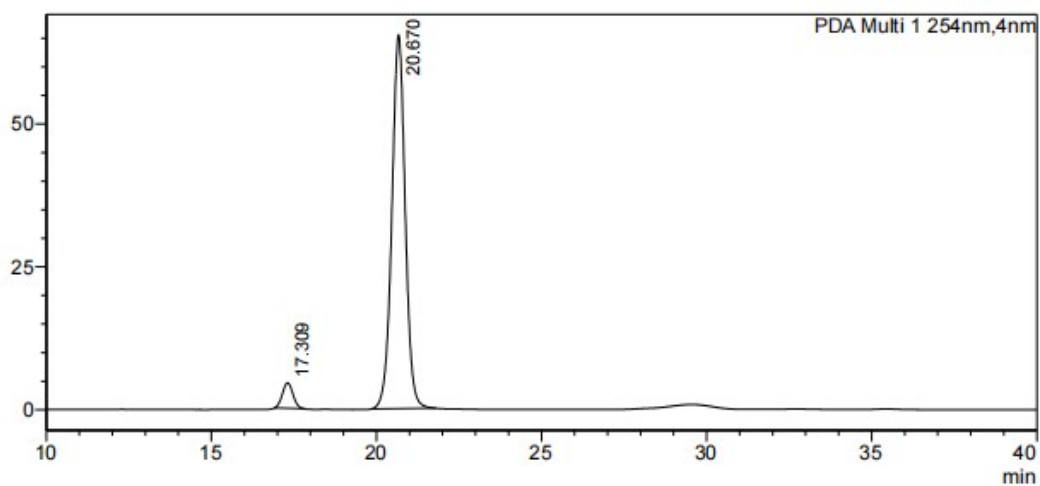

<Peak Table>

PDA Ch1 254nm

| Peak# | Ret. Time | Area    | Height | Area%   |
|-------|-----------|---------|--------|---------|
| 1     | 17.309    | 98666   | 4457   | 5.089   |
| 2     | 20.670    | 1840065 | 65304  | 94.911  |
| Total |           | 1938731 | 69761  | 100.000 |

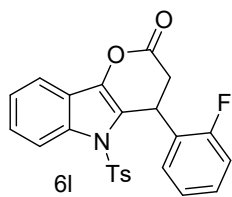

mAU

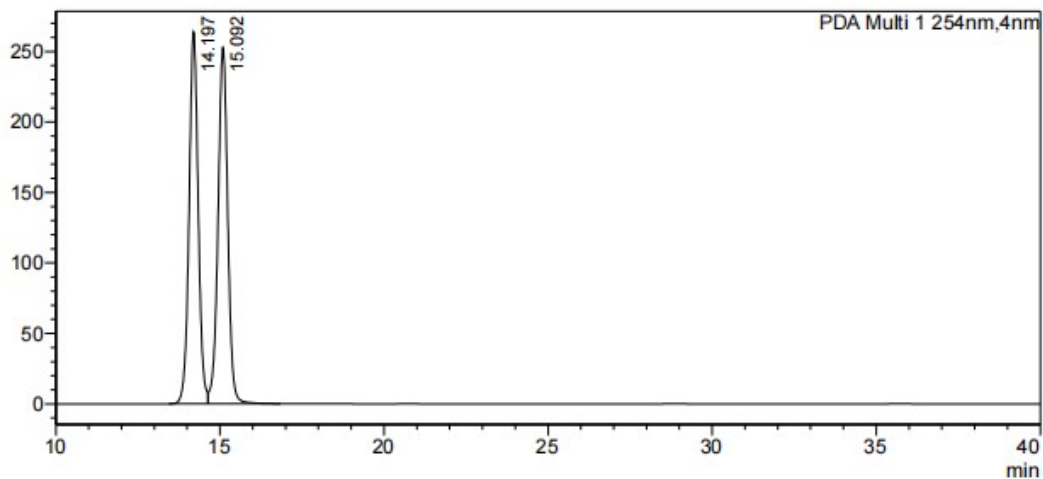

<Peak Table>

PDA Ch1 254nm

| Peak# | Ret. Time | Area     | Height | Area%   |
|-------|-----------|----------|--------|---------|
| 1     | 14.197    | 5117544  | 263706 | 49.504  |
| 2     | 15.092    | 5220097  | 252743 | 50.496  |
| Total |           | 10337641 | 516449 | 100.000 |

mAU

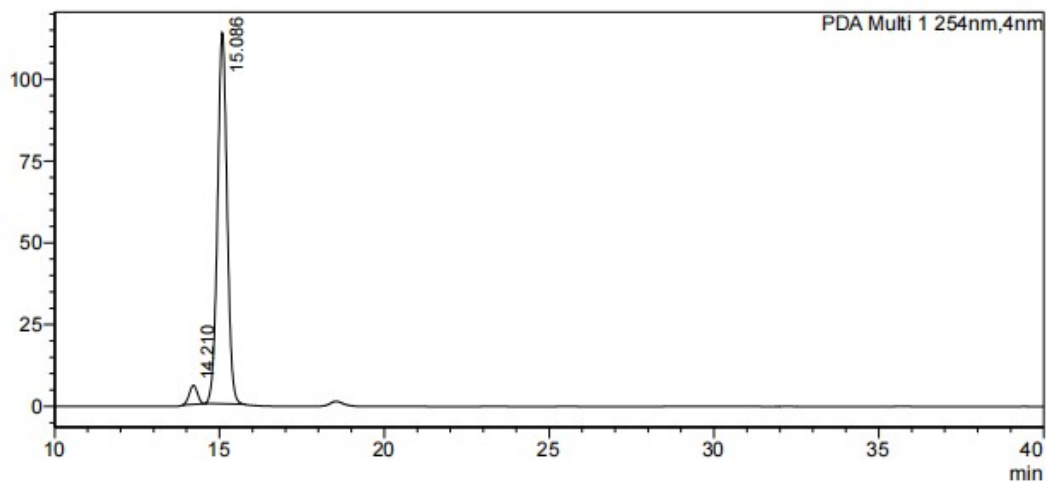

<Peak Table>

PDA Ch1 254nm

| Peak# | Ret. Time | Area    | Height | Area%   |
|-------|-----------|---------|--------|---------|
| 1     | 14.210    | 100463  | 5813   | 4.204   |
| 2     | 15.086    | 2289470 | 113379 | 95.796  |
| Total |           | 2389933 | 119192 | 100.000 |

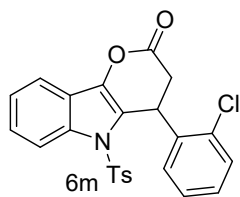

mAU

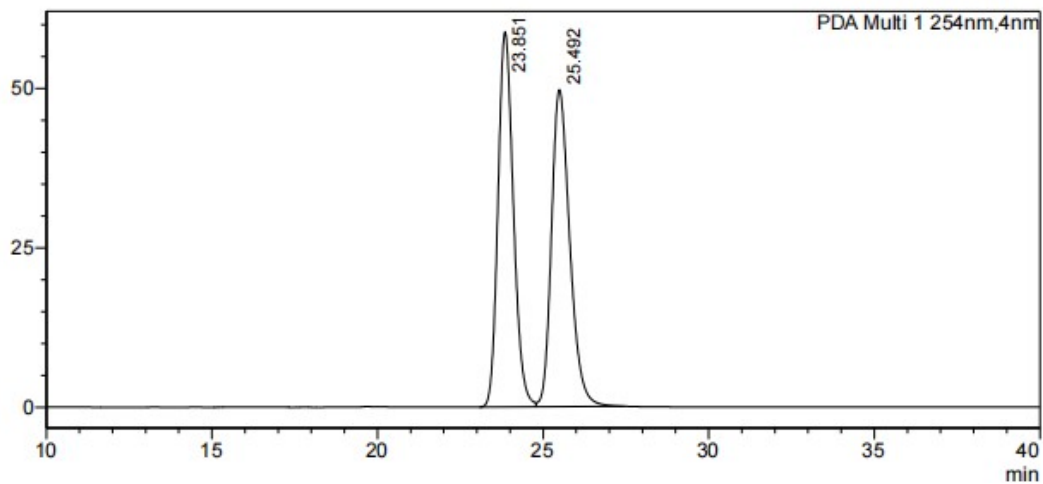

**<Peak Table>**

PDA Ch1 254nm

| Peak# | Ret. Time | Area    | Height | Area%   |
|-------|-----------|---------|--------|---------|
| 1     | 23.851    | 1902166 | 58765  | 49.909  |
| 2     | 25.492    | 1909135 | 49661  | 50.091  |
| Total |           | 3811300 | 108426 | 100.000 |

mAU

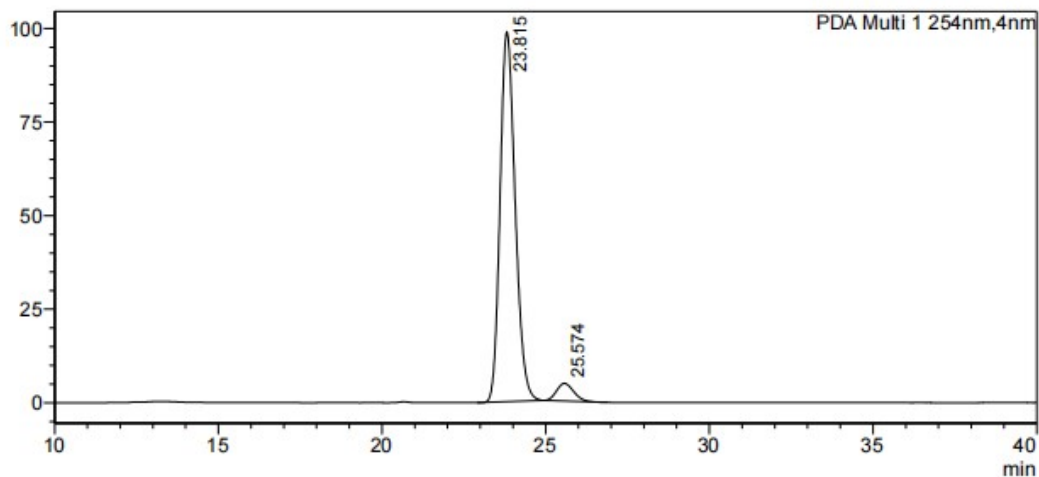

**<Peak Table>**

PDA Ch1 254nm

| Peak# | Ret. Time | Area    | Height | Area%   |
|-------|-----------|---------|--------|---------|
| 1     | 23.815    | 3171409 | 98702  | 94.916  |
| 2     | 25.574    | 169864  | 4694   | 5.084   |
| Total |           | 3341273 | 103397 | 100.000 |

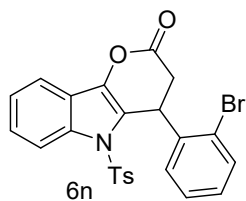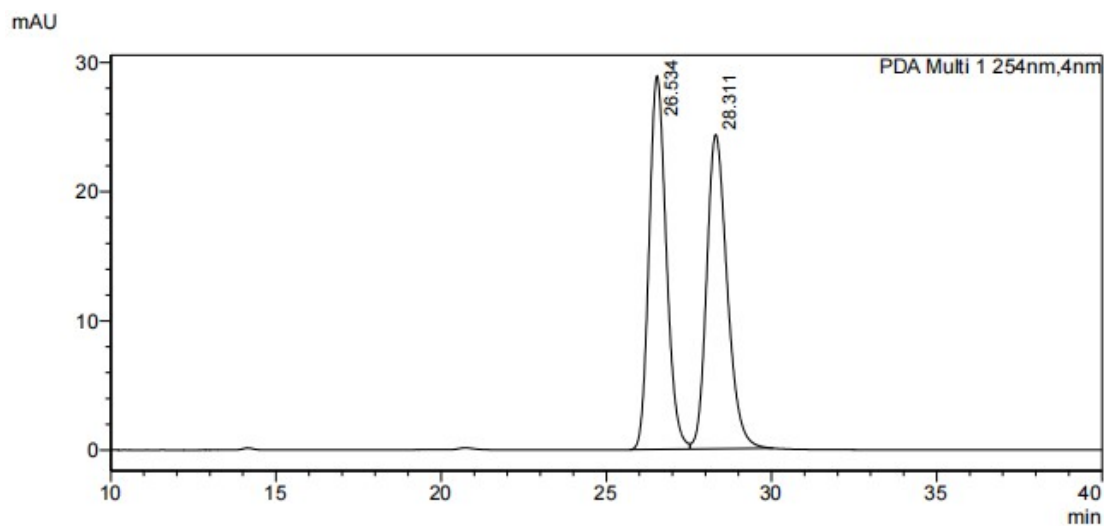

**<Peak Table>**

PDA Ch1 254nm

| Peak# | Ret. Time | Area    | Height | Area%   |
|-------|-----------|---------|--------|---------|
| 1     | 26.534    | 1046738 | 28886  | 49.947  |
| 2     | 28.311    | 1048980 | 24315  | 50.053  |
| Total |           | 2095718 | 53202  | 100.000 |

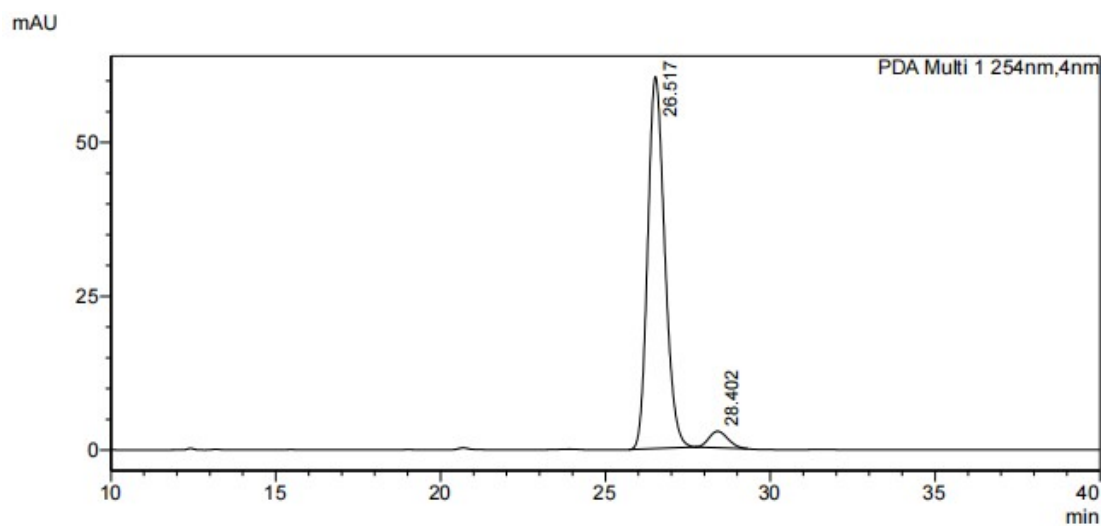

**<Peak Table>**

PDA Ch1 254nm

| Peak# | Ret. Time | Area    | Height | Area%   |
|-------|-----------|---------|--------|---------|
| 1     | 26.517    | 2169069 | 60415  | 95.304  |
| 2     | 28.402    | 106874  | 2678   | 4.696   |
| Total |           | 2275943 | 63093  | 100.000 |

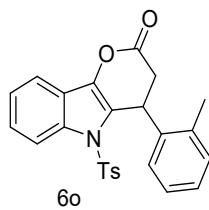

mAU

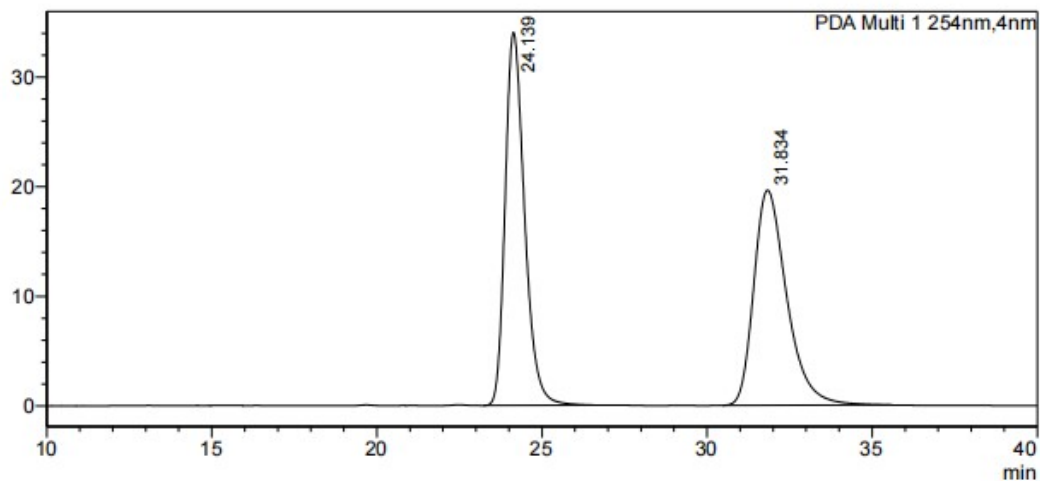

**<Peak Table>**

PDA Ch1 254nm

| Peak# | Ret. Time | Area    | Height | Area%   |
|-------|-----------|---------|--------|---------|
| 1     | 24.139    | 1389974 | 34042  | 50.529  |
| 2     | 31.834    | 1360878 | 19627  | 49.471  |
| Total |           | 2750852 | 53669  | 100.000 |

mAU

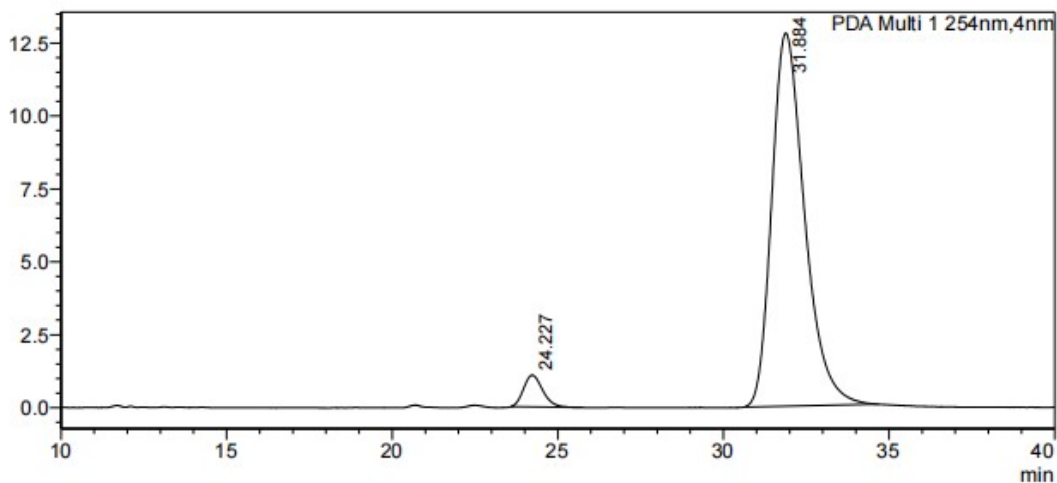

**<Peak Table>**

PDA Ch1 254nm

| Peak# | Ret. Time | Area   | Height | Area%   |
|-------|-----------|--------|--------|---------|
| 1     | 24.227    | 43675  | 1090   | 4.719   |
| 2     | 31.884    | 881908 | 12794  | 95.281  |
| Total |           | 925583 | 13883  | 100.000 |

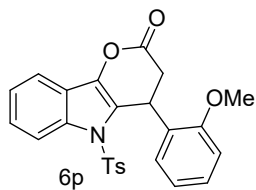

mAU

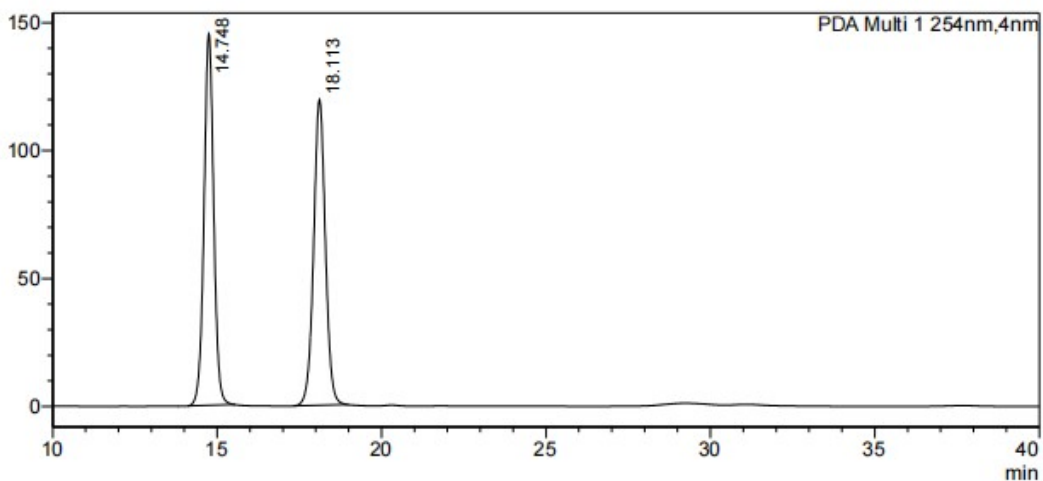

**<Peak Table>**

PDA Ch1 254nm

| Peak# | Ret. Time | Area    | Height | Area%   |
|-------|-----------|---------|--------|---------|
| 1     | 14.748    | 2974233 | 145224 | 50.065  |
| 2     | 18.113    | 2966494 | 119531 | 49.935  |
| Total |           | 5940727 | 264755 | 100.000 |

mAU

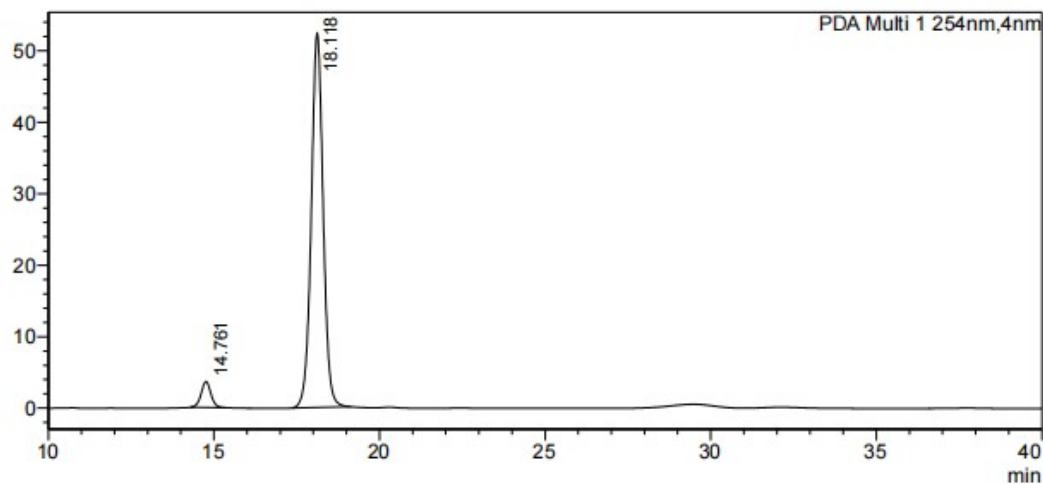

**<Peak Table>**

PDA Ch1 254nm

| Peak# | Ret. Time | Area    | Height | Area%   |
|-------|-----------|---------|--------|---------|
| 1     | 14.761    | 74088   | 3611   | 5.369   |
| 2     | 18.118    | 1305912 | 52353  | 94.631  |
| Total |           | 1380000 | 55964  | 100.000 |



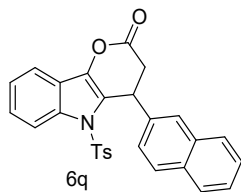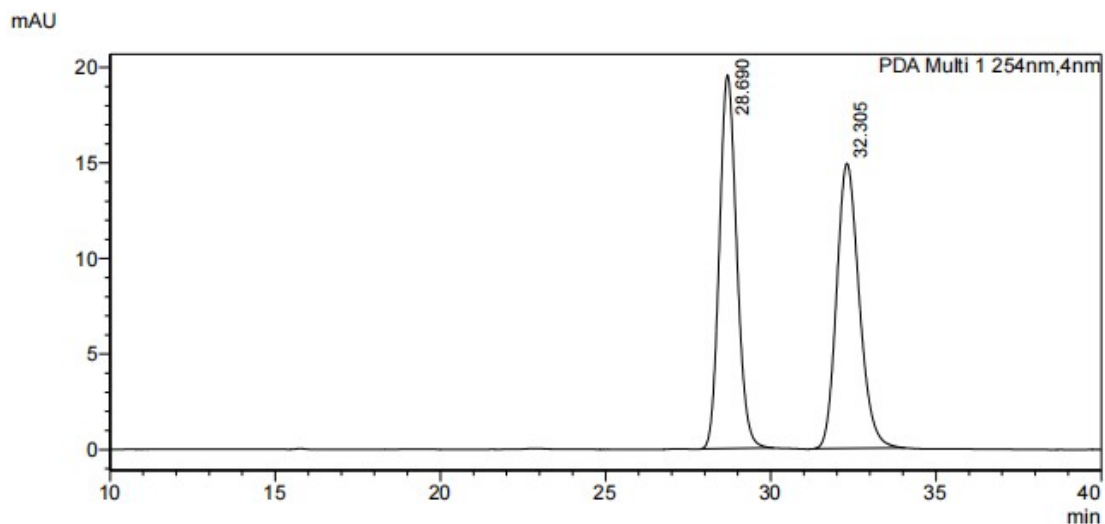

**<Peak Table>**

PDA Ch1 254nm

| Peak# | Ret. Time | Area    | Height | Area%   |
|-------|-----------|---------|--------|---------|
| 1     | 28.690    | 711972  | 19541  | 50.137  |
| 2     | 32.305    | 708084  | 14909  | 49.863  |
| Total |           | 1420056 | 34450  | 100.000 |

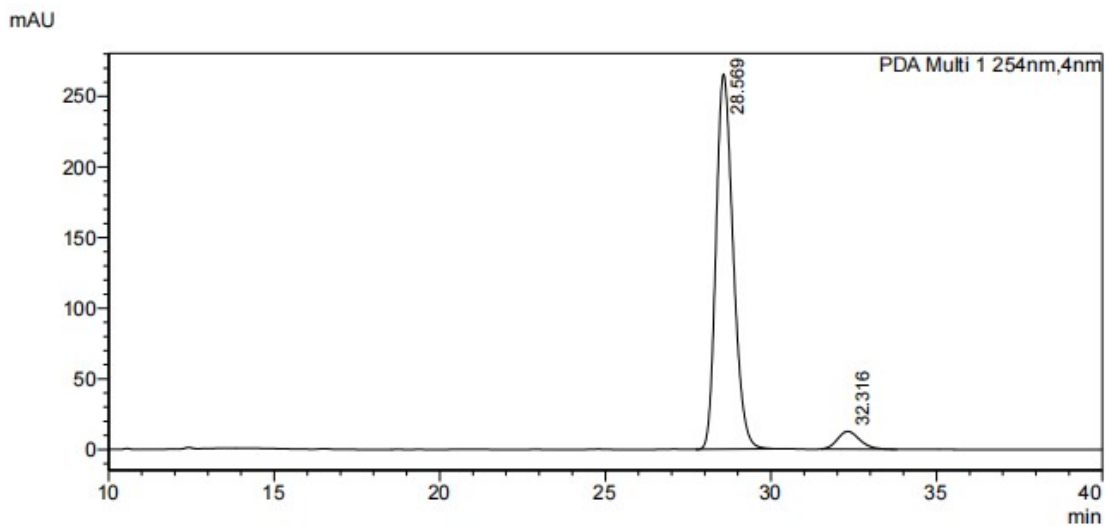

**<Peak Table>**

PDA Ch1 254nm

| Peak# | Ret. Time | Area     | Height | Area%   |
|-------|-----------|----------|--------|---------|
| 1     | 28.569    | 9553747  | 265368 | 94.235  |
| 2     | 32.316    | 584448   | 12525  | 5.765   |
| Total |           | 10138195 | 277893 | 100.000 |

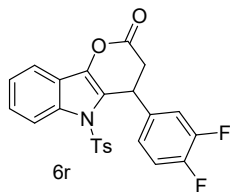

mAU

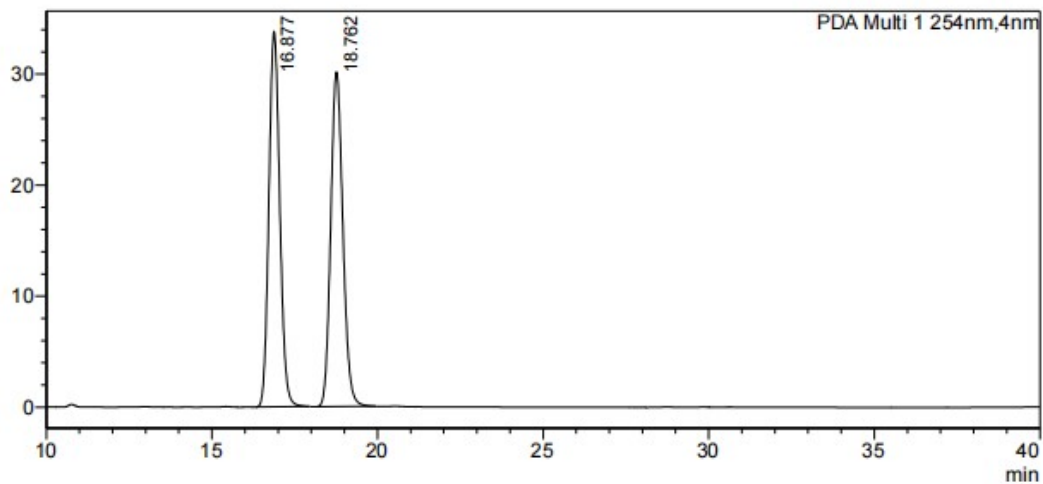

**<Peak Table>**

PDA Ch1 254nm

| Peak# | Ret. Time | Area    | Height | Area%   |
|-------|-----------|---------|--------|---------|
| 1     | 16.877    | 772733  | 33760  | 50.116  |
| 2     | 18.762    | 769144  | 30135  | 49.884  |
| Total |           | 1541877 | 63894  | 100.000 |

mAU

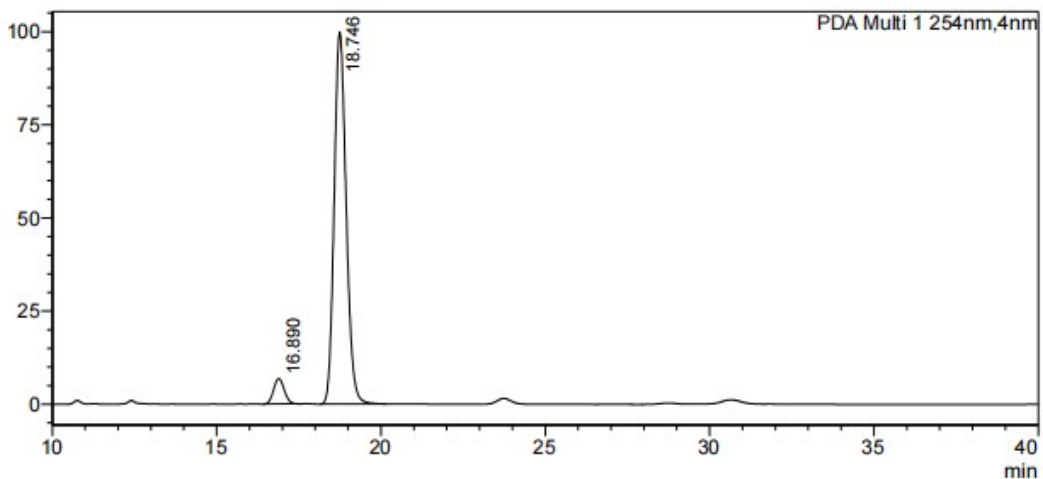

**<Peak Table>**

PDA Ch1 254nm

| Peak# | Ret. Time | Area    | Height | Area%   |
|-------|-----------|---------|--------|---------|
| 1     | 16.890    | 154026  | 6831   | 5.733   |
| 2     | 18.746    | 2532517 | 99732  | 94.267  |
| Total |           | 2686543 | 106563 | 100.000 |

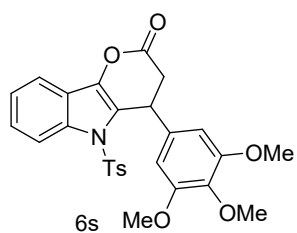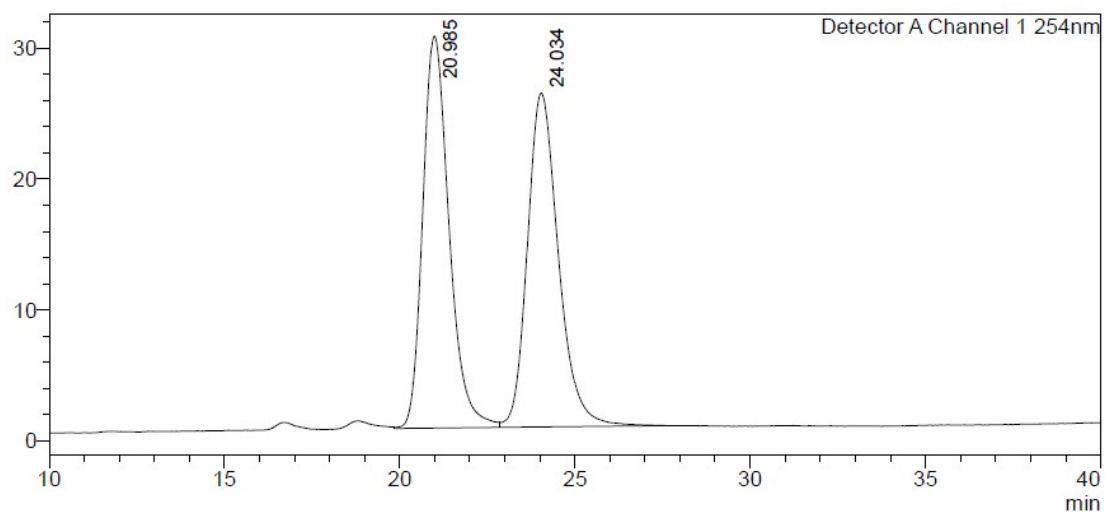

| Peak# | Ret. Time | Area    | Height | Area%   |
|-------|-----------|---------|--------|---------|
| 1     | 20.985    | 1561099 | 29932  | 49.849  |
| 2     | 24.034    | 1570559 | 25493  | 50.151  |
| Total |           | 3131657 | 55425  | 100.000 |

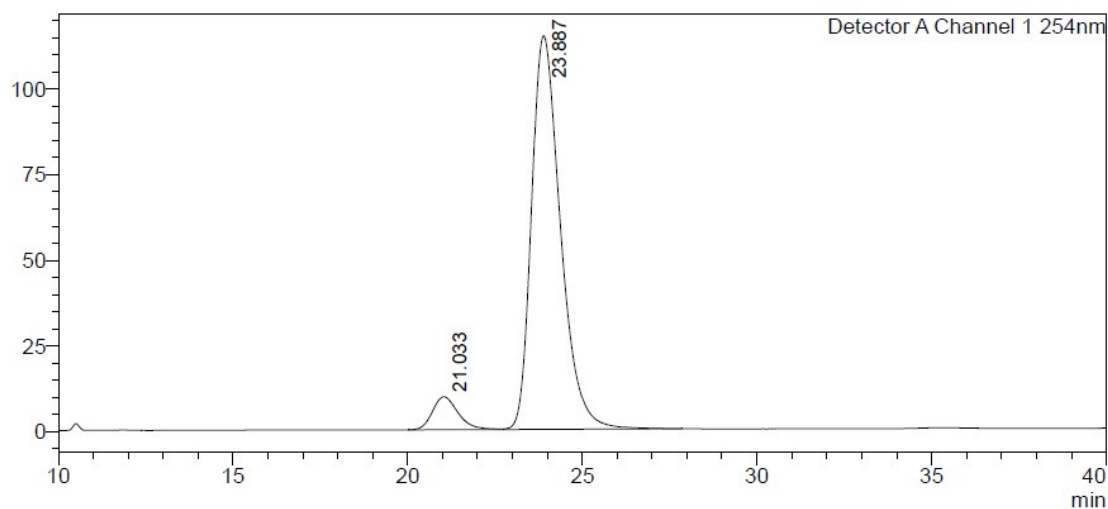

| Peak# | Ret. Time | Area    | Height | Area%   |
|-------|-----------|---------|--------|---------|
| 1     | 21.033    | 489244  | 9582   | 6.887   |
| 2     | 23.887    | 6614350 | 114777 | 93.113  |
| Total |           | 7103594 | 124359 | 100.000 |

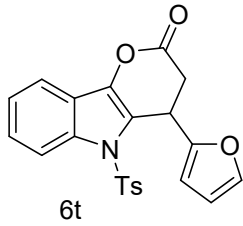

mAU

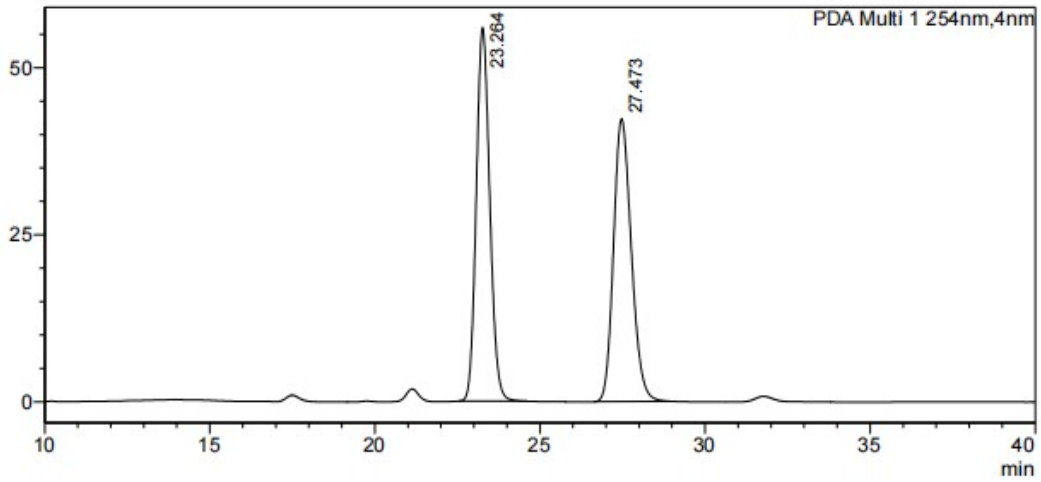

**<Peak Table>**

PDA Ch1 254nm

| Peak# | Ret. Time | Area    | Height | Area%   |
|-------|-----------|---------|--------|---------|
| 1     | 23.264    | 1591099 | 55821  | 50.065  |
| 2     | 27.473    | 1586979 | 42317  | 49.935  |
| Total |           | 3178078 | 98138  | 100.000 |

mAU

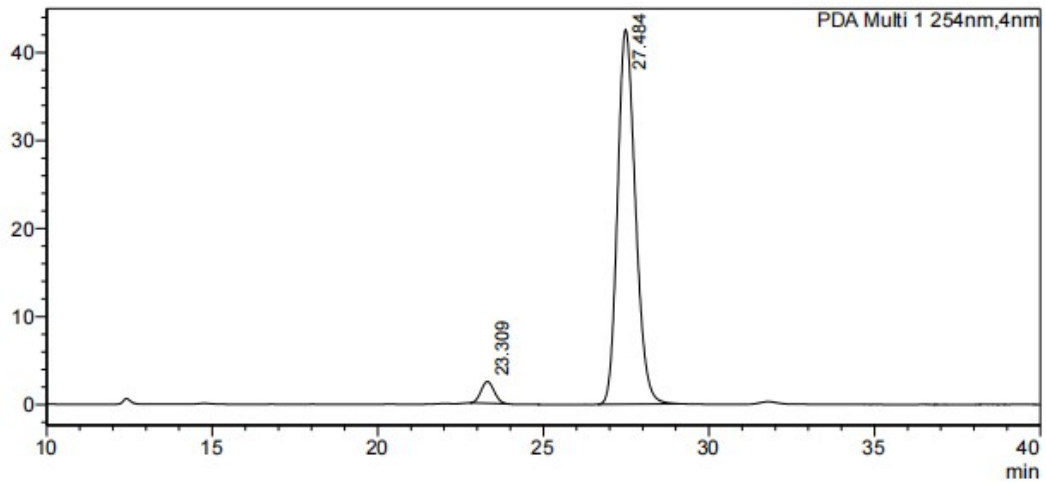

**<Peak Table>**

PDA Ch1 254nm

| Peak# | Ret. Time | Area    | Height | Area%   |
|-------|-----------|---------|--------|---------|
| 1     | 23.309    | 68458   | 2475   | 4.102   |
| 2     | 27.484    | 1600517 | 42557  | 95.898  |
| Total |           | 1668974 | 45032  | 100.000 |

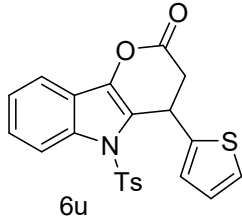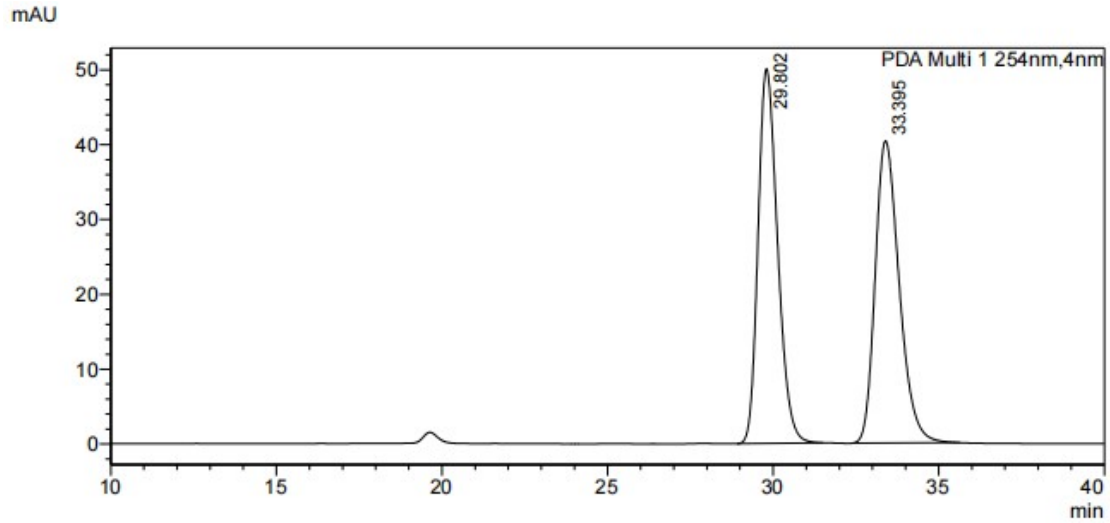

**<Peak Table>**

PDA Ch1 254nm

| Peak# | Ret. Time | Area    | Height | Area%   |
|-------|-----------|---------|--------|---------|
| 1     | 29.802    | 2050597 | 50034  | 50.124  |
| 2     | 33.395    | 2040469 | 40383  | 49.876  |
| Total |           | 4091066 | 90417  | 100.000 |

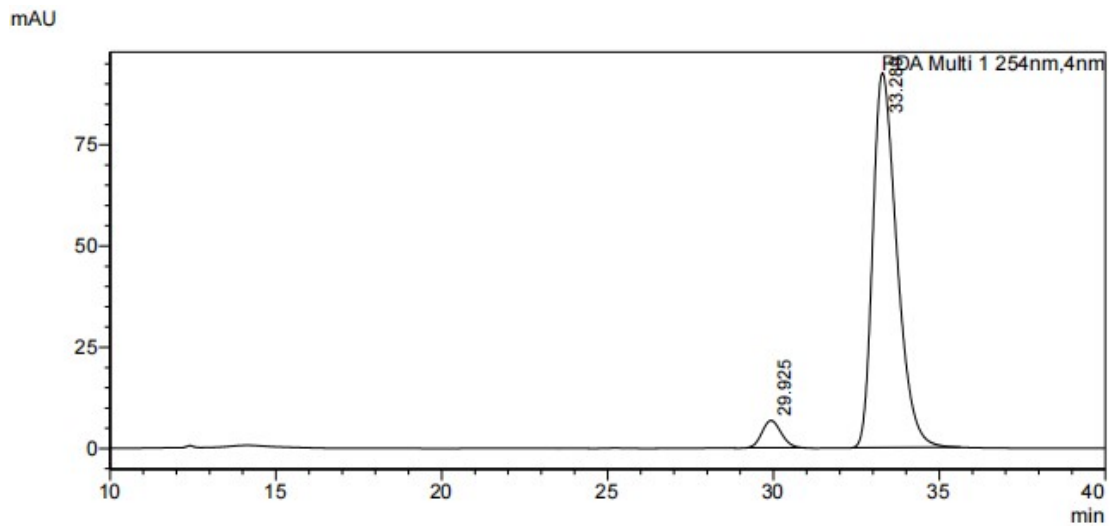

**<Peak Table>**

PDA Ch1 254nm

| Peak# | Ret. Time | Area    | Height | Area%   |
|-------|-----------|---------|--------|---------|
| 1     | 29.925    | 271472  | 6728   | 5.488   |
| 2     | 33.289    | 4674770 | 92513  | 94.512  |
| Total |           | 4946242 | 99241  | 100.000 |

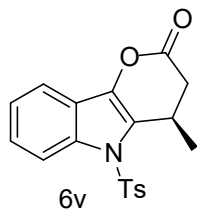

mAU

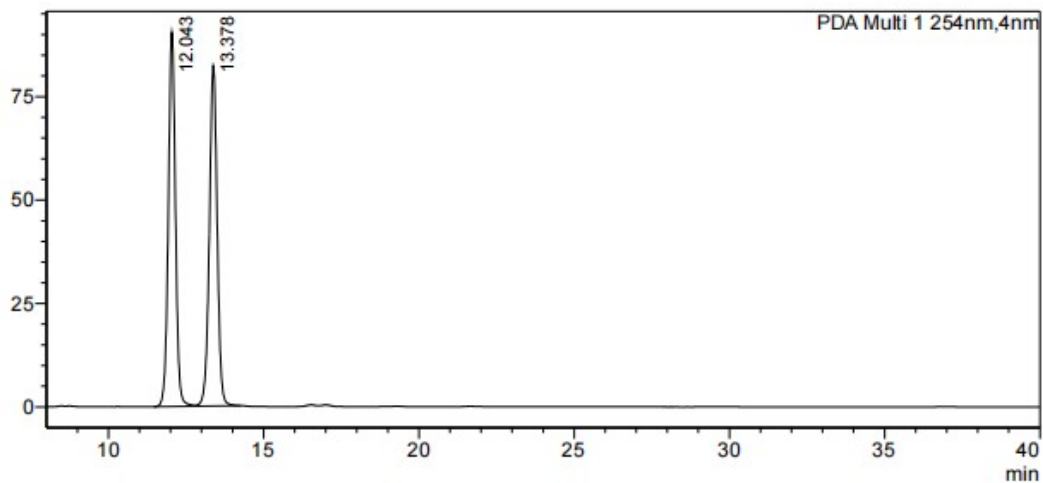

**<Peak Table>**

PDA Ch1 254nm

| Peak# | Ret. Time | Area    | Height | Area%   |
|-------|-----------|---------|--------|---------|
| 1     | 12.043    | 1443154 | 90430  | 49.981  |
| 2     | 13.378    | 1444243 | 82317  | 50.019  |
| Total |           | 2887397 | 172746 | 100.000 |

mAU

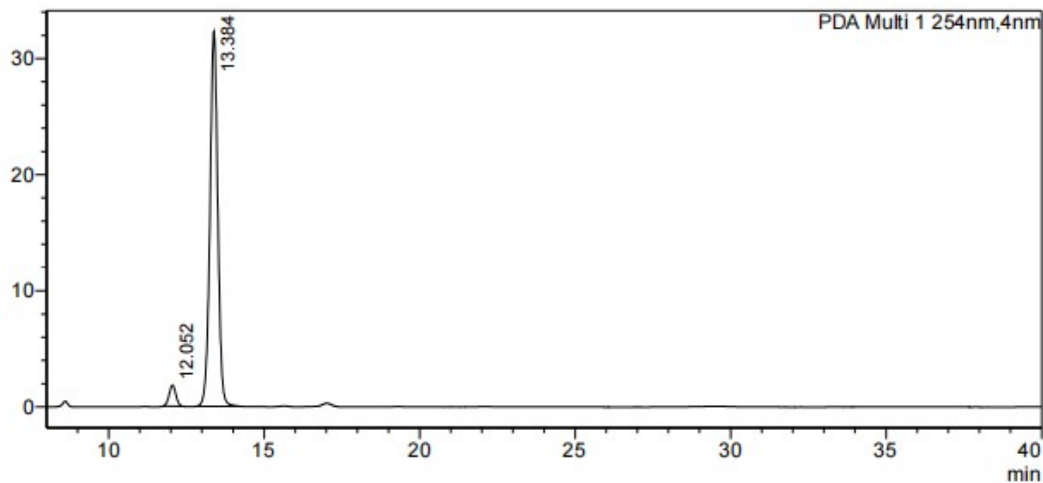

**<Peak Table>**

PDA Ch1 254nm

| Peak# | Ret. Time | Area   | Height | Area%   |
|-------|-----------|--------|--------|---------|
| 1     | 12.052    | 27194  | 1803   | 4.585   |
| 2     | 13.384    | 565957 | 32264  | 95.415  |
| Total |           | 593151 | 34068  | 100.000 |

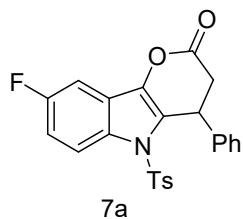

mAU

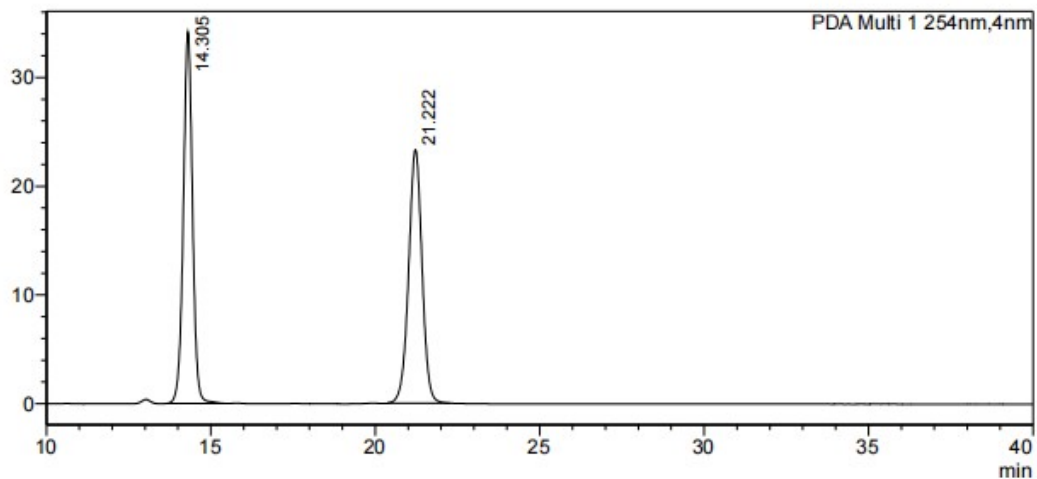

**<Peak Table>**

PDA Ch1 254nm

| Peak# | Ret. Time | Area    | Height | Area%   |
|-------|-----------|---------|--------|---------|
| 1     | 14.305    | 664448  | 34136  | 50.140  |
| 2     | 21.222    | 660728  | 23305  | 49.860  |
| Total |           | 1325175 | 57440  | 100.000 |

mAU

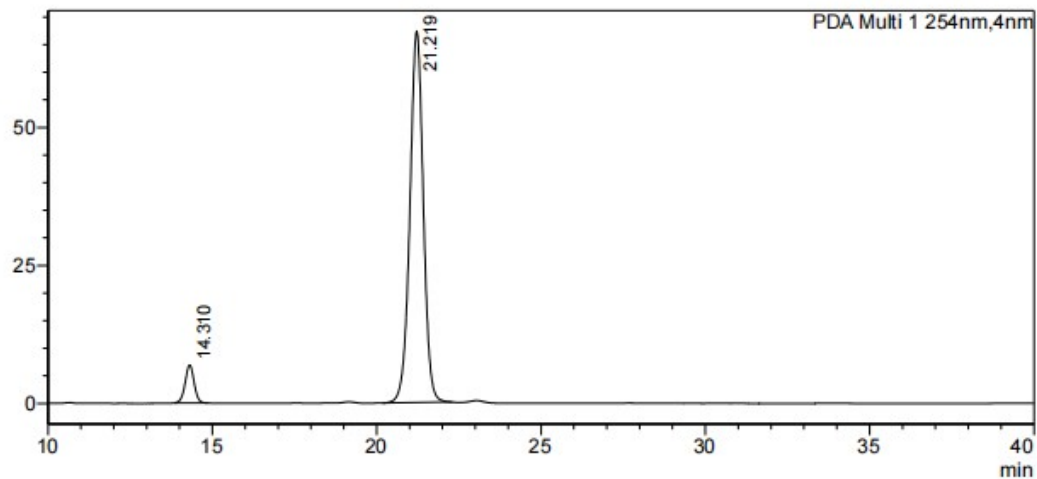

**<Peak Table>**

PDA Ch1 254nm

| Peak# | Ret. Time | Area    | Height | Area%   |
|-------|-----------|---------|--------|---------|
| 1     | 14.310    | 130452  | 6860   | 6.386   |
| 2     | 21.219    | 1912366 | 67249  | 93.614  |
| Total |           | 2042818 | 74109  | 100.000 |

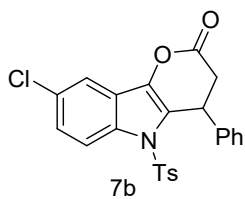

mAU

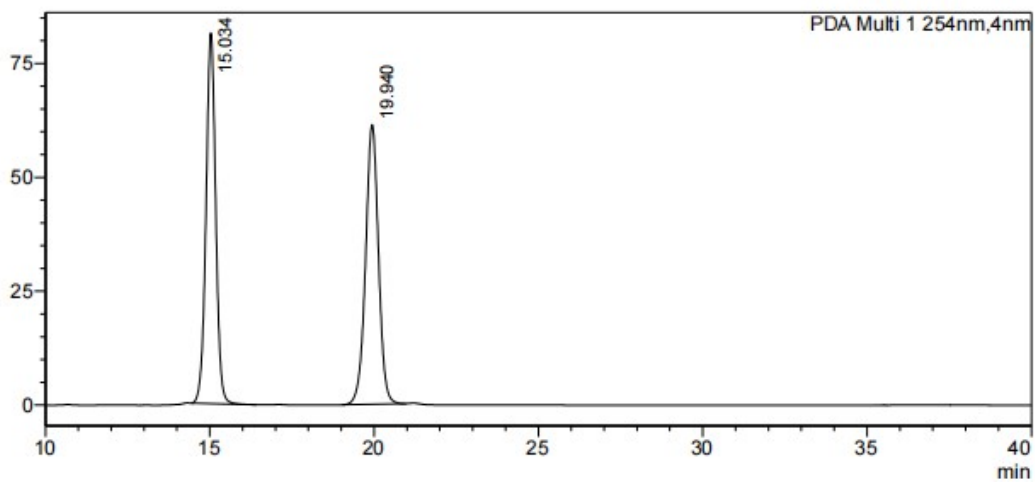

**<Peak Table>**

PDA Ch1 254nm

| Peak# | Ret. Time | Area    | Height | Area%   |
|-------|-----------|---------|--------|---------|
| 1     | 15.034    | 1671867 | 81287  | 49.916  |
| 2     | 19.940    | 1677480 | 61328  | 50.084  |
| Total |           | 3349347 | 142615 | 100.000 |

mAU

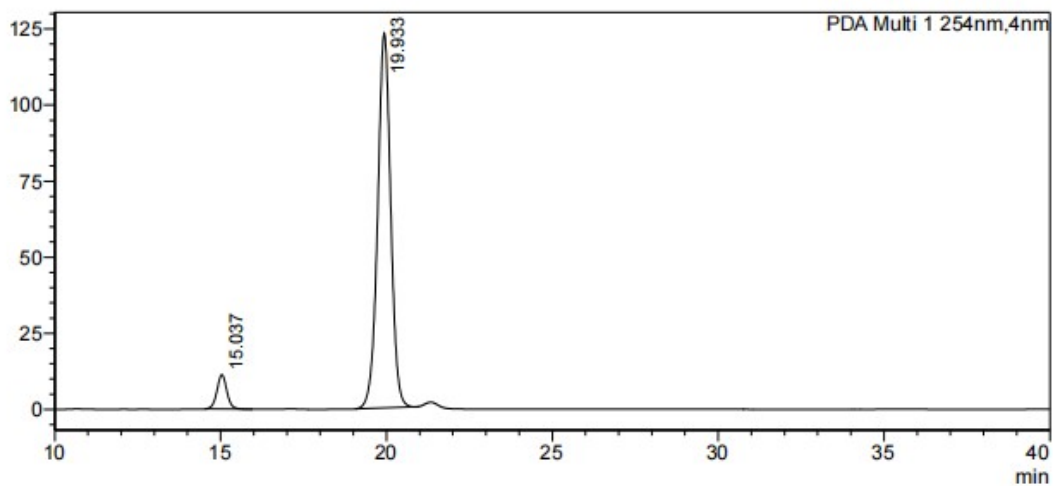

**<Peak Table>**

PDA Ch1 254nm

| Peak# | Ret. Time | Area    | Height | Area%   |
|-------|-----------|---------|--------|---------|
| 1     | 15.037    | 234967  | 11317  | 6.522   |
| 2     | 19.933    | 3367742 | 123064 | 93.478  |
| Total |           | 3602709 | 134381 | 100.000 |



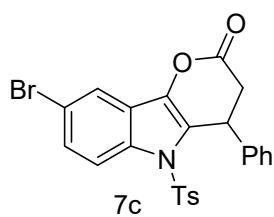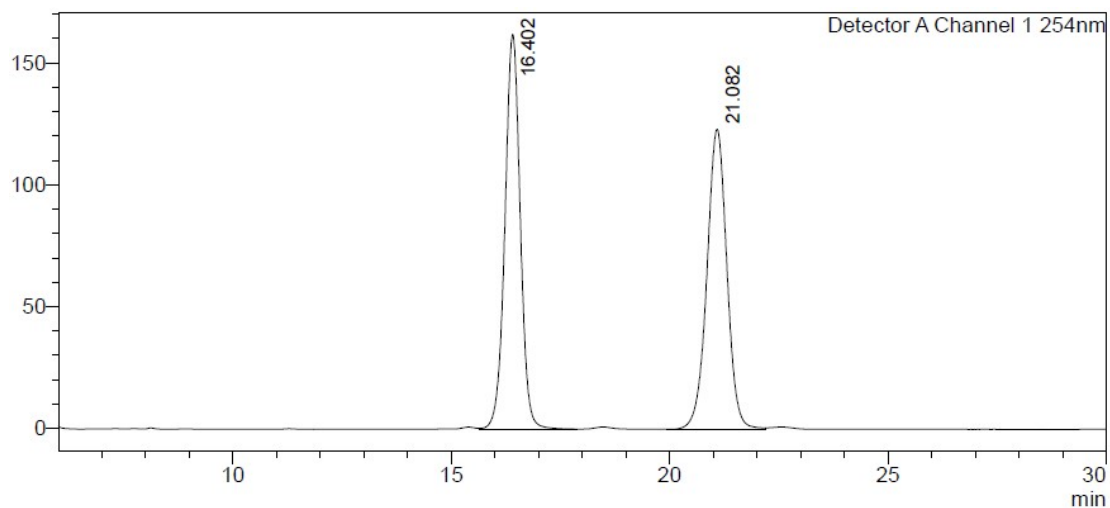

| Peak# | Ret. Time | Area    | Height | Area%   |
|-------|-----------|---------|--------|---------|
| 1     | 16.402    | 3971492 | 162076 | 50.347  |
| 2     | 21.082    | 3916706 | 123227 | 49.653  |
| Total |           | 7888198 | 285303 | 100.000 |

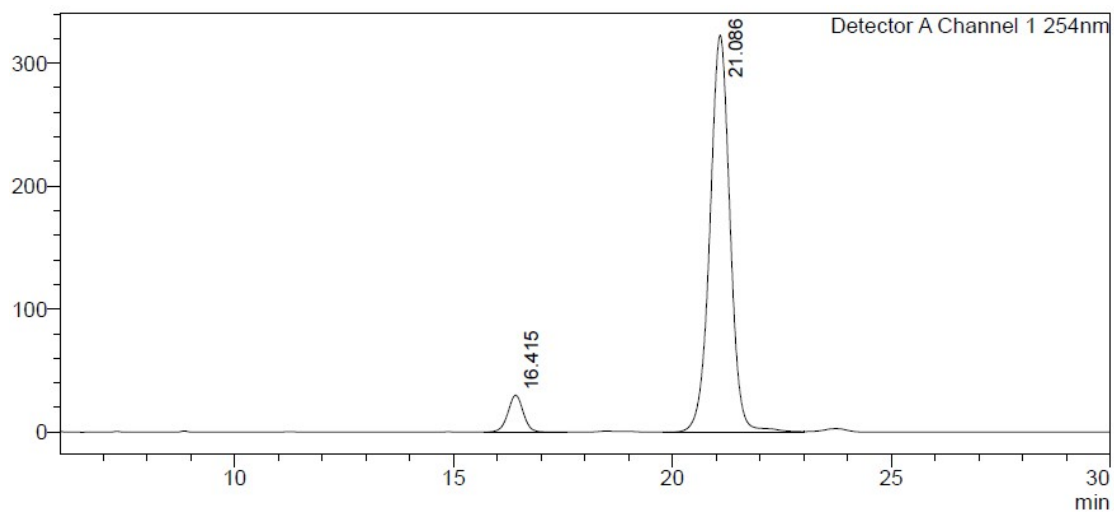

| Peak# | Ret. Time | Area     | Height | Area%   |
|-------|-----------|----------|--------|---------|
| 1     | 16.415    | 736794   | 29947  | 6.665   |
| 2     | 21.086    | 10317195 | 322541 | 93.335  |
| Total |           | 11053990 | 352488 | 100.000 |

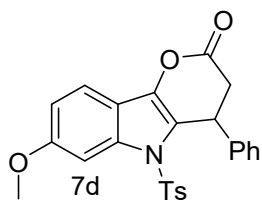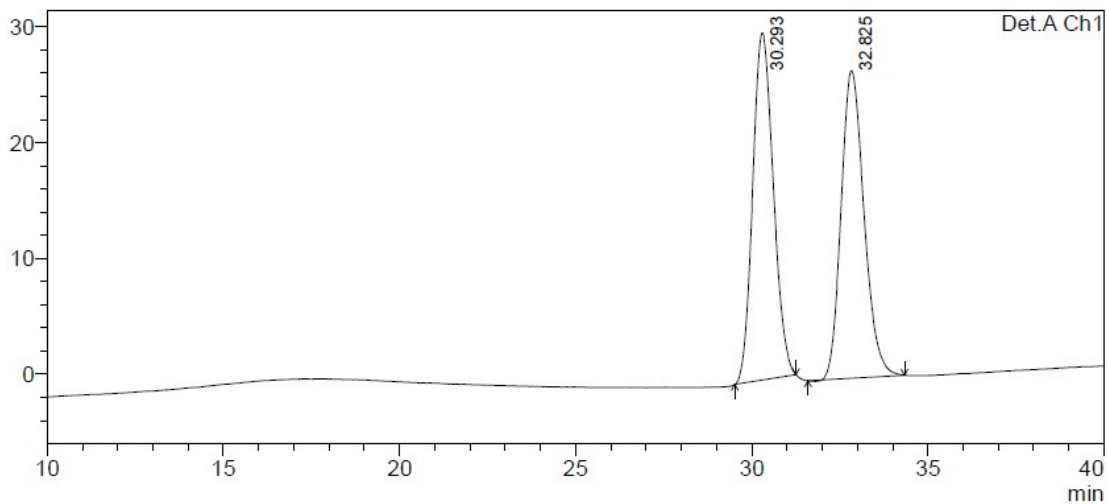

| Peak# | Ret. Time | Area    | Height | Area %  | Height % |
|-------|-----------|---------|--------|---------|----------|
| 1     | 30.293    | 1219916 | 29997  | 50.387  | 53.022   |
| 2     | 32.825    | 1201193 | 26578  | 49.613  | 46.978   |
| Total |           | 2421109 | 56575  | 100.000 | 100.000  |

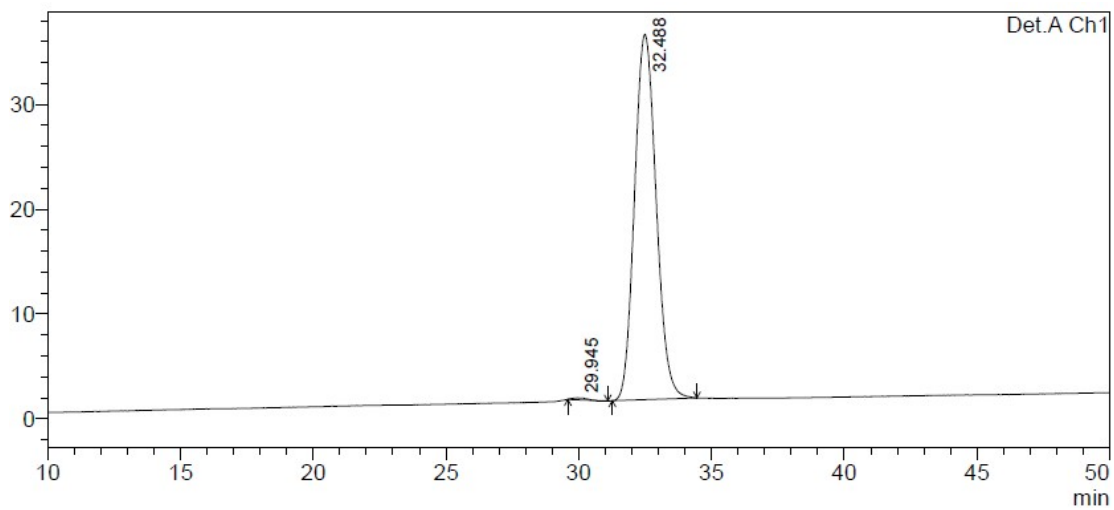

Detector A Ch1 254nm

| Peak# | Ret. Time | Area    | Height | Area %  | Height % |
|-------|-----------|---------|--------|---------|----------|
| 1     | 29.945    | 6217    | 188    | 0.314   | 0.537    |
| 2     | 32.488    | 1974146 | 34854  | 99.686  | 99.463   |
| Total |           | 1980363 | 35042  | 100.000 | 100.000  |

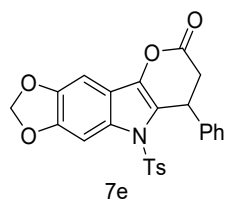

mAU

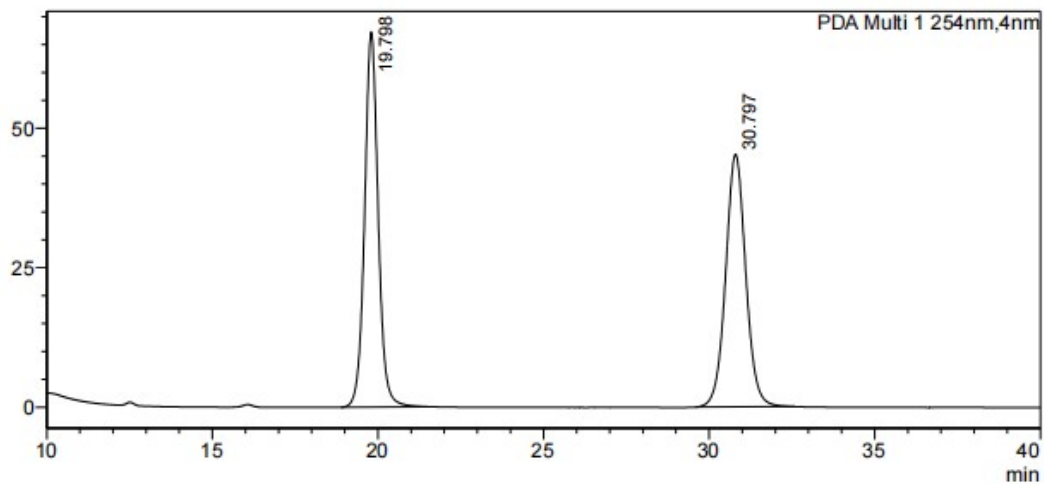

**<Peak Table>**

PDA Ch1 254nm

| Peak# | Ret. Time | Area    | Height | Area%   |
|-------|-----------|---------|--------|---------|
| 1     | 19.798    | 1915595 | 67179  | 50.019  |
| 2     | 30.797    | 1914127 | 45263  | 49.981  |
| Total |           | 3829723 | 112442 | 100.000 |

mAU

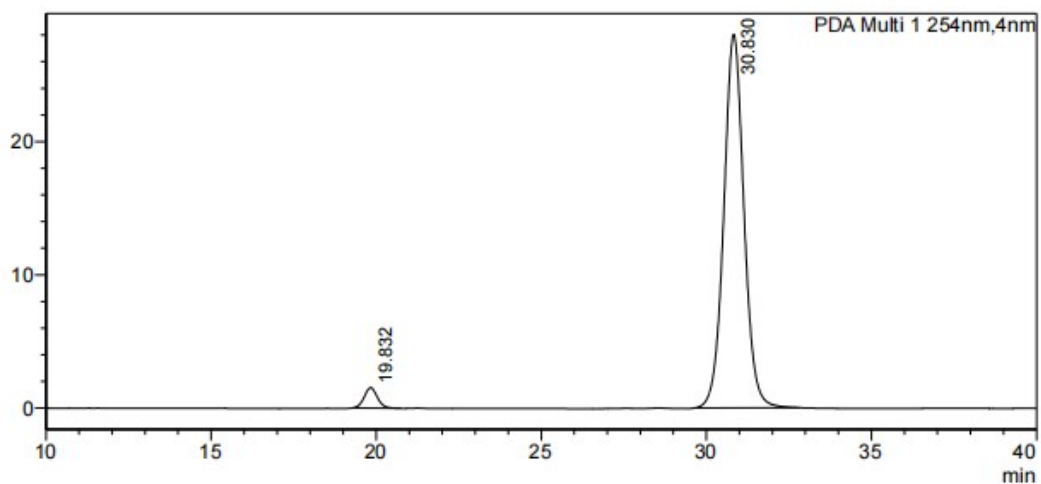

**<Peak Table>**

PDA Ch1 254nm

| Peak# | Ret. Time | Area    | Height | Area%   |
|-------|-----------|---------|--------|---------|
| 1     | 19.832    | 42921   | 1537   | 3.481   |
| 2     | 30.830    | 1190045 | 28024  | 96.519  |
| Total |           | 1232966 | 29561  | 100.000 |

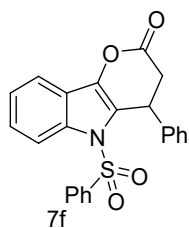

mAU

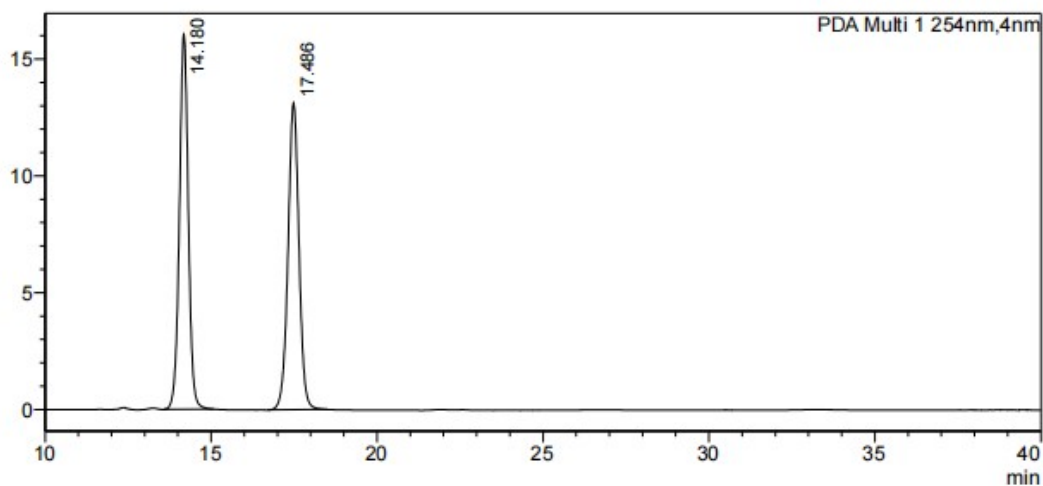

**<Peak Table>**

PDA Ch1 254nm

| Peak# | Ret. Time | Area   | Height | Area%   |
|-------|-----------|--------|--------|---------|
| 1     | 14.180    | 301063 | 16047  | 49.980  |
| 2     | 17.486    | 301301 | 13132  | 50.020  |
| Total |           | 602364 | 29178  | 100.000 |

mAU

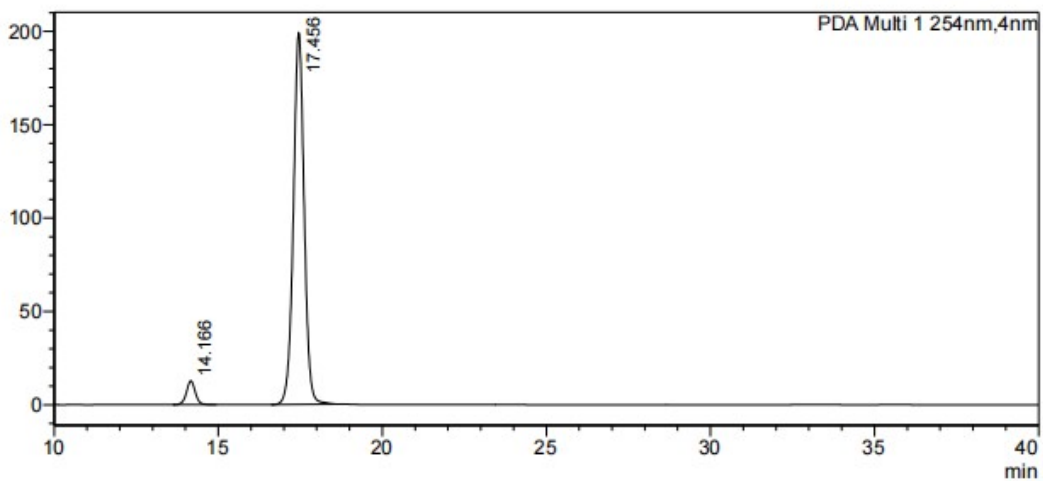

**<Peak Table>**

PDA Ch1 254nm

| Peak# | Ret. Time | Area    | Height | Area%   |
|-------|-----------|---------|--------|---------|
| 1     | 14.166    | 238538  | 12709  | 4.981   |
| 2     | 17.456    | 4550410 | 198938 | 95.019  |
| Total |           | 4788948 | 211647 | 100.000 |
